# Supplementary material for: Spontaneous Facial Mimicry Is Enhanced by the Goal of Inferring Emotional States: Evidence for Moderation of “Automatic” Mimicry by Higher Cognitive Processes
Source: PubMed Central journal article supplement (PMC4824486; doi:10.1371/journal.pone.0153128), 2016-04-07
Supplement: pone.0153128.s007.pdf [file pone.0153128.s007.pdf]

| Target's gender | Target's ID in the ATR Facial Expression Image Database DB99 | Emotional expressions       |
|-----------------|--------------------------------------------------------------|-----------------------------|
| Female          | f3                                                           | anger disgust fear surprise |
|                 | f10                                                          | happiness sadness surprise  |
|                 | f13                                                          | anger disgust fear          |
|                 | f16                                                          | happiness sadness           |
| Male            | m1                                                           | happiness sadness disgust   |
|                 | m6                                                           | happiness disgust           |
|                 | m9                                                           | sadness anger fear surprise |
|                 | m10                                                          | anger fear surprise         |
