# Supplementary material for: Spontaneous Facial Mimicry Is Enhanced by the Goal of Inferring Emotional States: Evidence for Moderation of “Automatic” Mimicry by Higher Cognitive Processes
Source: PubMed Central journal article supplement (PMC4824486; doi:10.1371/journal.pone.0153128), 2016-04-07
Supplement: pone.0153128.s008.pdf [file pone.0153128.s008.pdf]

| Model           | Random effects           | Fixed effects                             | $k$      | Deviance<br>$-2 \log L^*$ | Residual<br>deviance | AIC            | Rank <sub>AIC</sub> |
|-----------------|--------------------------|-------------------------------------------|----------|---------------------------|----------------------|----------------|---------------------|
| model 1         | Participants             | Null                                      | 1        | 9078.16                   | 62.71                | 9082.16        | 15                  |
| model 2         | Trials                   | Condition                                 | 2        | 9070.33                   | 54.88                | 9076.33        | 13                  |
| model 3         | (Same for all<br>models) | Muscle type                               | 2        | 9067.51                   | 52.06                | 9073.51        | 11                  |
| model 4         |                          | Emotion                                   | 6        | 9064.99                   | 49.54                | 9078.99        | 14                  |
| model 5         |                          | Condition    Muscle type                  | 3        | 9059.68                   | 44.23                | 9067.68        | 7                   |
| model 6         |                          | Muscle type    Emotion                    | 7        | 9054.53                   | 39.08                | 9070.53        | 8                   |
| model 7         |                          | Condition    Emotion                      | 7        | 9057.08                   | 41.63                | 9073.08        | 10                  |
| model 8         |                          | Condition    Muscle type    Emotion       | 8        | 9046.61                   | 31.16                | 9064.61        | 3                   |
| model 9         |                          | Condition x Muscle type                   | 4        | 9052.03                   | 36.58                | 9062.03        | 2                   |
| model 10        |                          | Emotion x Muscle type                     | 12       | 9044.78                   | 29.33                | 9070.78        | 9                   |
| model 11        |                          | Condition x Emotion                       | 12       | 9048.97                   | 33.52                | 9074.97        | 12                  |
| <b>model 12</b> |                          | <b>Condition x Muscle type    Emotion</b> | <b>9</b> | <b>9038.94</b>            | <b>23.49</b>         | <b>9058.94</b> | <b>1</b>            |
| model 13        |                          | Condition    Muscle type x Emotion        | 13       | 9036.84                   | 21.39                | 9064.84        | 4                   |
| model 14        |                          | Condition x Emotion    Muscle type        | 13       | 9038.47                   | 23.02                | 9066.47        | 6                   |
| model 15        |                          | Full                                      | 24       | 9015.45                   | 0                    | 9065.45        | 5                   |

*Note.* We have also conducted a GLMM analysis with participant's gender as an additional fixed effect. Because our hypothesis centered on the interaction effect between Condition and Muscle type, we tested whether there was a gender effect in relation to the Condition x Muscle type interaction. Two of the models that contained the effect of gender had slightly smaller AIC than model 12 (i.e., Model A: Condition x Muscle type, Emotion, Gender, AIC = 9057.90; Model B: Condition x Muscle type x Gender, Emotion, AIC = 9057.48). The contribution of the effect of gender in Model A was statistically marginal,  $F_{1,4580} = 3.05, p = .081$ , indicating that females tended to be more facially reactive to facial stimuli (but not selectively as implied by facial mimicry) than males. As seen in S1 Fig, the Condition x Muscle type x Gender effect in Model B was largely due to the negative mean EMG activity of the targeted muscles among males in the Passive condition. However, notice that the hypothesized Condition x Muscle type interaction is statistically robust for both males and females. Separate matched-pair T tests showed a significantly greater mean EMG activity of the targeted muscles than the non-targeted muscles in the Emotion-Inference condition (males:  $t_{11} = 2.71, p = 0.02$ ; females:  $t_{13} = 3.09, p = 0.01$ ) but not in the Passive condition (males:  $t_{12} = -1.76, p = 0.11$ ; females:  $t_{10} = 1.53, p = 0.16$ ). Thus, for the sake of simplicity, we did not include those models that incorporated participant's gender in S2 Table.
