# Supplementary material for: Spontaneous Facial Mimicry Is Enhanced by the Goal of Inferring Emotional States: Evidence for Moderation of “Automatic” Mimicry by Higher Cognitive Processes
Source: PubMed Central journal article supplement (PMC4824486; doi:10.1371/journal.pone.0153128), 2016-04-07
Supplement: pone.0153128.s009.pdf [file pone.0153128.s009.pdf]

model 12

| Parameters              |                   |               | Coefficient | SE   | 95% Confidence Limits |       | df   | F    | p       |
|-------------------------|-------------------|---------------|-------------|------|-----------------------|-------|------|------|---------|
| Intercept               |                   |               | 0.02        | 0.03 | -0.07                 | 0.10  | 3    |      |         |
| Condition x Muscle Type | (Condition)       | (Muscle Type) |             |      |                       |       |      | 8.71 | <0.0001 |
|                         | Emotion-Inference | Targeted      | 0.14        | 0.03 | 0.08                  | 0.20  | 4580 |      |         |
|                         |                   | Non-targeted  | 0.02        | 0.02 | -0.02                 | 0.06  | 4580 |      |         |
|                         | Passive           | Targeted      | 0.01        | 0.03 | -0.05                 | 0.07  | 4580 |      |         |
|                         |                   | Non-targeted  | 0.00        |      |                       |       |      |      |         |
| Emotion                 |                   |               |             |      |                       |       |      | 2.62 | 0.0225  |
|                         |                   | anger         | -0.03       | 0.03 | -0.10                 | 0.03  | 4580 |      |         |
|                         |                   | disgust       | -0.05       | 0.03 | -0.11                 | 0.02  | 4580 |      |         |
|                         |                   | fear          | -0.03       | 0.03 | -0.09                 | 0.04  | 4580 |      |         |
|                         |                   | happiness     | -0.11       | 0.03 | -0.18                 | -0.05 | 4580 |      |         |
|                         |                   | sadness       | -0.05       | 0.03 | -0.11                 | 0.01  | 4580 |      |         |
|                         |                   | surprise      | 0.00        |      |                       |       |      |      |         |
