# Supplementary material for: Spontaneous Facial Mimicry Is Enhanced by the Goal of Inferring Emotional States: Evidence for Moderation of “Automatic” Mimicry by Higher Cognitive Processes
Source: PubMed Central journal article supplement (PMC4824486; doi:10.1371/journal.pone.0153128), 2016-04-07
Supplement: pone.0153128.s010.pdf [file pone.0153128.s010.pdf]

| Condition         | Question (in Japanese)                     | Choices                                               |
|-------------------|--------------------------------------------|-------------------------------------------------------|
| Emotion-Inference | “How does this person feel? ”              | happy / sad / angry / disgusted / fearful / surprised |
|                   | “Is this person female or male?”           | female / male / hard to tell                          |
|                   | “How old is this person?”                  | 10's / 20's / 30's / 40's / 50's / 60's               |
| Trait-Judgment    | “What is this person’s ethnic background?” | European / Asian / African / Oceanian / Arabic        |
|                   | “What body shape does this person have?”   | tall and lean / average / stout / stocky              |
