# Supplementary material for: Spontaneous Facial Mimicry Is Enhanced by the Goal of Inferring Emotional States: Evidence for Moderation of “Automatic” Mimicry by Higher Cognitive Processes
Source: PubMed Central journal article supplement (PMC4824486; doi:10.1371/journal.pone.0153128), 2016-04-07
Supplement: pone.0153128.s011.pdf [file pone.0153128.s011.pdf]

| Model           | Random effects        | Fixed effects              |                   |         | $k$      | Deviance<br>$-2 \log L^*$ | Residual<br>deviance | AIC           | Rank <sub>AIC</sub> |
|-----------------|-----------------------|----------------------------|-------------------|---------|----------|---------------------------|----------------------|---------------|---------------------|
| model 1         | Participants          | Null                       |                   |         | 1        | 1018.78                   | 158.45               | 1022.78       | 13                  |
| model 2         | (Same for all models) | Condition                  |                   |         | 2        | 1015.13                   | 154.8                | 1021.13       | 12                  |
| model 3         |                       | AU Type                    |                   |         | 2        | 1034.53                   | 174.2                | 1038.53       | 15                  |
| model 4         |                       | Emotion                    |                   |         | 6        | 1002.98                   | 142.65               | 1016.98       | 11                  |
| model 5         |                       | Condition                  | AU Type           |         | 3        | 918.69                    | 58.36                | 926.69        | 9                   |
| model 6         |                       | AU Type                    | Emotion           |         | 7        | 897.12                    | 36.79                | 913.12        | 6                   |
| model 7         |                       | Condition                  | Emotion           |         | 7        | 999.37                    | 139.04               | 1015.37       | 10                  |
| model 8         |                       | Condition                  | AU Type           | Emotion | 8        | 893.42                    | 33.09                | 911.42        | 4                   |
| model 9         |                       | Condition x AU Type        |                   |         | 4        | 908.97                    | 48.64                | 918.97        | 7                   |
| model 10        |                       | Emotion x AU Type          |                   |         | 12       | 886.59                    | 26.26                | 912.59        | 5                   |
| model 11        |                       | Condition x Emotion        |                   |         | 12       | 997.14                    | 136.81               | 1023.14       | 14                  |
| <b>model 12</b> |                       | <b>Condition x AU Type</b> | <b>Emotion</b>    |         | <b>9</b> | <b>883.36</b>             | <b>23.03</b>         | <b>903.36</b> | <b>1</b>            |
| model 13        |                       | Condition                  | AU Type x Emotion |         | 13       | 882.88                    | 22.55                | 910.88        | 3                   |
| model 14        |                       | Condition x Emotion        | AU Type           |         | 13       | 891.07                    | 30.74                | 919.07        | 8                   |
| model 15        |                       | Full                       |                   |         | 24       | 860.33                    | 0                    | 910.33        | 2                   |

*Note.* We also conducted a GLMM analysis with participant's gender as an additional fixed effect. However, none of those models provided a better fit to the FACS data in terms of AIC than model 12 in the table. Thus, for the sake of simplicity, we did not include those models that incorporated participant's gender in S5 Table. We also conducted a GLMM analysis incorporating trials as random effects and treating FACS coding in each trial as a binary score. However, five of these models did not converge numerically to maximum likelihood estimates due to excessive zero frequencies. To solve this problem, we used the rate of AU movements in response to each emotional expression (out of 4 trials per emotion) as a measure of the degree of facial mimicry in the GLMM analysis.
