# Supplementary material for: Spontaneous Facial Mimicry Is Enhanced by the Goal of Inferring Emotional States: Evidence for Moderation of “Automatic” Mimicry by Higher Cognitive Processes
Source: PubMed Central journal article supplement (PMC4824486; doi:10.1371/journal.pone.0153128), 2016-04-07
Supplement: pone.0153128.s012.pdf [file pone.0153128.s012.pdf]

model 12

| Parameters          |                   |              | Coefficient | <i>SE</i> | 95% Confidence Limits |       | <i>df</i> | <i>F</i> | <i>p</i> |
|---------------------|-------------------|--------------|-------------|-----------|-----------------------|-------|-----------|----------|----------|
| Intercept           |                   |              | -4.87       | 0.41      | -5.69                 | -4.05 | 54        |          |          |
| Condition x AU Type | (Condition)       | (AU Type)    |             |           |                       |       |           | 36.49    | <.0001   |
|                     | Emotion-Inference | Targeted     | 2.29        | 0.44      | 1.40                  | 3.17  | 52        |          |          |
|                     |                   | Non-targeted | 0.10        | 0.46      | -0.83                 | 1.02  | 52        |          |          |
|                     | Trait-Judgment    | Targeted     | 1.06        | 0.28      | 0.49                  | 1.62  | 52        |          |          |
|                     |                   | Non-targeted | 0.00        |           |                       |       |           |          |          |
| Emotion             |                   |              |             |           |                       |       |           | 4.95     | .0002    |
|                     | anger             |              | 0.27        | 0.28      | -0.29                 | 0.83  | 266       |          |          |
|                     | disgust           |              | -0.63       | 0.31      | -1.23                 | -0.02 | 266       |          |          |
|                     | fear              |              | -0.55       | 0.34      | -1.21                 | 0.11  | 266       |          |          |
|                     | happiness         |              | -0.08       | 0.30      | -0.67                 | 0.52  | 266       |          |          |
|                     | sadness           |              | 0.57        | 0.27      | 0.03                  | 1.10  | 266       |          |          |
|                     | surprise          |              | 0.00        |           |                       |       |           |          |          |
