# Supplementary material for: Spontaneous Facial Mimicry Is Enhanced by the Goal of Inferring Emotional States: Evidence for Moderation of “Automatic” Mimicry by Higher Cognitive Processes
Source: PLoS One. 2016 Apr 7;11(4):e0153128. doi: 10.1371/journal.pone.0153128 (PMC4824486; doi:10.1371/journal.pone.0153128)
Supplement: S2 Dataset — (XLSX) [file pone.0153128.s002.xlsx]

## Sheet: Dataset STUDY2
Participant's ID	Condition	Gender	Age	Emotion	Trial (4 trials per each emotion)	Target's ID	Occurrence of AUs	AU	AU-Type	Question	Response	Recognition accuracy (1:correct_x0008_; 0:incorrect) *Responses to the questions about ethnicity, gender and age were used to calculate recognition accuracy. Responses to the question about body-shape, for which no objective criterion was available, were not included.
1064092	Emotion-Inference	female	18	anger	1	f3	0	AU2	non-targeted	Emotion-Inference	disgust	0
1064092	Emotion-Inference	female	18	anger	1	f3	0	AU10	non-targeted	Emotion-Inference	disgust	0
1064092	Emotion-Inference	female	18	anger	1	f3	0	AU12	non-targeted	Emotion-Inference	disgust	0
1064092	Emotion-Inference	female	18	anger	1	f3	0	AU4	targeted	Emotion-Inference	disgust	0
1064092	Emotion-Inference	female	18	disgust	1	m6	0	AU2	non-targeted	Emotion-Inference	anger	0
1064092	Emotion-Inference	female	18	disgust	1	m6	0	AU12	non-targeted	Emotion-Inference	anger	0
1064092	Emotion-Inference	female	18	disgust	1	m6	0	AU4	targeted	Emotion-Inference	anger	0
1064092	Emotion-Inference	female	18	disgust	1	m6	0	AU10	targeted	Emotion-Inference	anger	0
1064092	Emotion-Inference	female	18	fear	1	f3	0	AU2	non-targeted	Emotion-Inference	surprise	0
1064092	Emotion-Inference	female	18	fear	1	f3	0	AU10	non-targeted	Emotion-Inference	surprise	0
1064092	Emotion-Inference	female	18	fear	1	f3	0	AU12	non-targeted	Emotion-Inference	surprise	0
1064092	Emotion-Inference	female	18	fear	1	f3	0	AU4	targeted	Emotion-Inference	surprise	0
1064092	Emotion-Inference	female	18	happiness	1	m6	0	AU2	non-targeted	Emotion-Inference	fear	0
1064092	Emotion-Inference	female	18	happiness	1	m6	0	AU4	non-targeted	Emotion-Inference	fear	0
1064092	Emotion-Inference	female	18	happiness	1	m6	0	AU10	non-targeted	Emotion-Inference	fear	0
1064092	Emotion-Inference	female	18	happiness	1	m6	0	AU12	targeted	Emotion-Inference	fear	0
1064092	Emotion-Inference	female	18	sadness	1	f16	0	AU2	non-targeted	Emotion-Inference	sadness	1
1064092	Emotion-Inference	female	18	sadness	1	f16	0	AU10	non-targeted	Emotion-Inference	sadness	1
1064092	Emotion-Inference	female	18	sadness	1	f16	0	AU12	non-targeted	Emotion-Inference	sadness	1
1064092	Emotion-Inference	female	18	sadness	1	f16	0	AU4	targeted	Emotion-Inference	sadness	1
1064092	Emotion-Inference	female	18	surprise	1	f3	0	AU4	non-targeted	Emotion-Inference	surprise	1
1064092	Emotion-Inference	female	18	surprise	1	f3	0	AU10	non-targeted	Emotion-Inference	surprise	1
1064092	Emotion-Inference	female	18	surprise	1	f3	0	AU12	non-targeted	Emotion-Inference	surprise	1
1064092	Emotion-Inference	female	18	surprise	1	f3	0	AU2	targeted	Emotion-Inference	surprise	1
1064092	Emotion-Inference	female	18	anger	2	m9	0	AU2	non-targeted	Emotion-Inference	anger	1
1064092	Emotion-Inference	female	18	anger	2	m9	0	AU10	non-targeted	Emotion-Inference	anger	1
1064092	Emotion-Inference	female	18	anger	2	m9	0	AU12	non-targeted	Emotion-Inference	anger	1
1064092	Emotion-Inference	female	18	anger	2	m9	0	AU4	targeted	Emotion-Inference	anger	1
1064092	Emotion-Inference	female	18	disgust	2	f3	0	AU2	non-targeted	Emotion-Inference	disgust	1
1064092	Emotion-Inference	female	18	disgust	2	f3	0	AU12	non-targeted	Emotion-Inference	disgust	1
1064092	Emotion-Inference	female	18	disgust	2	f3	0	AU4	targeted	Emotion-Inference	disgust	1
1064092	Emotion-Inference	female	18	disgust	2	f3	0	AU10	targeted	Emotion-Inference	disgust	1
1064092	Emotion-Inference	female	18	fear	2	m9	0	AU2	non-targeted	Emotion-Inference	disgust	0
1064092	Emotion-Inference	female	18	fear	2	m9	0	AU10	non-targeted	Emotion-Inference	disgust	0
1064092	Emotion-Inference	female	18	fear	2	m9	0	AU12	non-targeted	Emotion-Inference	disgust	0
1064092	Emotion-Inference	female	18	fear	2	m9	0	AU4	targeted	Emotion-Inference	disgust	0
1064092	Emotion-Inference	female	18	happiness	2	f16	0	AU2	non-targeted	Emotion-Inference	happiness	1
1064092	Emotion-Inference	female	18	happiness	2	f16	0	AU4	non-targeted	Emotion-Inference	happiness	1
1064092	Emotion-Inference	female	18	happiness	2	f16	0	AU10	non-targeted	Emotion-Inference	happiness	1
1064092	Emotion-Inference	female	18	happiness	2	f16	0	AU12	targeted	Emotion-Inference	happiness	1
1064092	Emotion-Inference	female	18	sadness	2	m9	0	AU2	non-targeted	Emotion-Inference	fear	0
1064092	Emotion-Inference	female	18	sadness	2	m9	0	AU10	non-targeted	Emotion-Inference	fear	0
1064092	Emotion-Inference	female	18	sadness	2	m9	0	AU12	non-targeted	Emotion-Inference	fear	0
1064092	Emotion-Inference	female	18	sadness	2	m9	0	AU4	targeted	Emotion-Inference	fear	0
1064092	Emotion-Inference	female	18	surprise	2	m9	0	AU4	non-targeted	Emotion-Inference	surprise	1
1064092	Emotion-Inference	female	18	surprise	2	m9	0	AU10	non-targeted	Emotion-Inference	surprise	1
1064092	Emotion-Inference	female	18	surprise	2	m9	0	AU12	non-targeted	Emotion-Inference	surprise	1
1064092	Emotion-Inference	female	18	surprise	2	m9	0	AU2	targeted	Emotion-Inference	surprise	1
1064092	Emotion-Inference	female	18	anger	3	f13	0	AU2	non-targeted	Emotion-Inference	anger	1
1064092	Emotion-Inference	female	18	anger	3	f13	0	AU10	non-targeted	Emotion-Inference	anger	1
1064092	Emotion-Inference	female	18	anger	3	f13	0	AU12	non-targeted	Emotion-Inference	anger	1
1064092	Emotion-Inference	female	18	anger	3	f13	0	AU4	targeted	Emotion-Inference	anger	1
1064092	Emotion-Inference	female	18	disgust	3	m1	0	AU2	non-targeted	Emotion-Inference	anger	0
1064092	Emotion-Inference	female	18	disgust	3	m1	0	AU12	non-targeted	Emotion-Inference	anger	0
1064092	Emotion-Inference	female	18	disgust	3	m1	0	AU4	targeted	Emotion-Inference	anger	0
1064092	Emotion-Inference	female	18	disgust	3	m1	0	AU10	targeted	Emotion-Inference	anger	0
1064092	Emotion-Inference	female	18	fear	3	f13		AU2	non-targeted	Emotion-Inference	fear	1
1064092	Emotion-Inference	female	18	fear	3	f13		AU10	non-targeted	Emotion-Inference	fear	1
1064092	Emotion-Inference	female	18	fear	3	f13		AU12	non-targeted	Emotion-Inference	fear	1
1064092	Emotion-Inference	female	18	fear	3	f13		AU4	targeted	Emotion-Inference	fear	1
1064092	Emotion-Inference	female	18	happiness	3	f10	0	AU2	non-targeted	Emotion-Inference	happiness	1
1064092	Emotion-Inference	female	18	happiness	3	f10	0	AU4	non-targeted	Emotion-Inference	happiness	1
1064092	Emotion-Inference	female	18	happiness	3	f10	0	AU10	non-targeted	Emotion-Inference	happiness	1
1064092	Emotion-Inference	female	18	happiness	3	f10	0	AU12	targeted	Emotion-Inference	happiness	1
1064092	Emotion-Inference	female	18	sadness	3	f10	0	AU2	non-targeted	Emotion-Inference	disgust	0
1064092	Emotion-Inference	female	18	sadness	3	f10	0	AU10	non-targeted	Emotion-Inference	disgust	0
1064092	Emotion-Inference	female	18	sadness	3	f10	0	AU12	non-targeted	Emotion-Inference	disgust	0
1064092	Emotion-Inference	female	18	sadness	3	f10	0	AU4	targeted	Emotion-Inference	disgust	0
1064092	Emotion-Inference	female	18	surprise	3	f10		AU4	non-targeted	Emotion-Inference	surprise	1
1064092	Emotion-Inference	female	18	surprise	3	f10	0	AU10	non-targeted	Emotion-Inference	surprise	1
1064092	Emotion-Inference	female	18	surprise	3	f10	0	AU12	non-targeted	Emotion-Inference	surprise	1
1064092	Emotion-Inference	female	18	surprise	3	f10	0	AU2	targeted	Emotion-Inference	surprise	1
1064092	Emotion-Inference	female	18	anger	4	m10	0	AU2	non-targeted	Emotion-Inference	anger	1
1064092	Emotion-Inference	female	18	anger	4	m10	0	AU10	non-targeted	Emotion-Inference	anger	1
1064092	Emotion-Inference	female	18	anger	4	m10	0	AU12	non-targeted	Emotion-Inference	anger	1
1064092	Emotion-Inference	female	18	anger	4	m10	0	AU4	targeted	Emotion-Inference	anger	1
1064092	Emotion-Inference	female	18	disgust	4	f13	0	AU2	non-targeted	Emotion-Inference	fear	0
1064092	Emotion-Inference	female	18	disgust	4	f13	0	AU12	non-targeted	Emotion-Inference	fear	0
1064092	Emotion-Inference	female	18	disgust	4	f13	0	AU4	targeted	Emotion-Inference	fear	0
1064092	Emotion-Inference	female	18	disgust	4	f13	0	AU10	targeted	Emotion-Inference	fear	0
1064092	Emotion-Inference	female	18	fear	4	m10	0	AU2	non-targeted	Emotion-Inference	fear	1
1064092	Emotion-Inference	female	18	fear	4	m10	0	AU10	non-targeted	Emotion-Inference	fear	1
1064092	Emotion-Inference	female	18	fear	4	m10	0	AU12	non-targeted	Emotion-Inference	fear	1
1064092	Emotion-Inference	female	18	fear	4	m10	0	AU4	targeted	Emotion-Inference	fear	1
1064092	Emotion-Inference	female	18	happiness	4	m1	0	AU2	non-targeted	Emotion-Inference	happiness	1
1064092	Emotion-Inference	female	18	happiness	4	m1	0	AU4	non-targeted	Emotion-Inference	happiness	1
1064092	Emotion-Inference	female	18	happiness	4	m1	0	AU10	non-targeted	Emotion-Inference	happiness	1
1064092	Emotion-Inference	female	18	happiness	4	m1	0	AU12	targeted	Emotion-Inference	happiness	1
1064092	Emotion-Inference	female	18	sadness	4	m1	0	AU2	non-targeted	Emotion-Inference	sadness	1
1064092	Emotion-Inference	female	18	sadness	4	m1	0	AU10	non-targeted	Emotion-Inference	sadness	1
1064092	Emotion-Inference	female	18	sadness	4	m1	0	AU12	non-targeted	Emotion-Inference	sadness	1
1064092	Emotion-Inference	female	18	sadness	4	m1	0	AU4	targeted	Emotion-Inference	sadness	1
1064092	Emotion-Inference	female	18	surprise	4	m10	0	AU4	non-targeted	Emotion-Inference	surprise	1
1064092	Emotion-Inference	female	18	surprise	4	m10	0	AU10	non-targeted	Emotion-Inference	surprise	1
1064092	Emotion-Inference	female	18	surprise	4	m10	0	AU12	non-targeted	Emotion-Inference	surprise	1
1064092	Emotion-Inference	female	18	surprise	4	m10	0	AU2	targeted	Emotion-Inference	surprise	1
1064258	Emotion-Inference	male	19	anger	1	f3	0	AU2	non-targeted	Emotion-Inference	disgust	0
1064258	Emotion-Inference	male	19	anger	1	f3	0	AU10	non-targeted	Emotion-Inference	disgust	0
1064258	Emotion-Inference	male	19	anger	1	f3	0	AU12	non-targeted	Emotion-Inference	disgust	0
1064258	Emotion-Inference	male	19	anger	1	f3	0	AU4	targeted	Emotion-Inference	disgust	0
1064258	Emotion-Inference	male	19	disgust	1	m6	0	AU2	non-targeted	Emotion-Inference	sadness	0
1064258	Emotion-Inference	male	19	disgust	1	m6	0	AU12	non-targeted	Emotion-Inference	sadness	0
1064258	Emotion-Inference	male	19	disgust	1	m6	0	AU4	targeted	Emotion-Inference	sadness	0
1064258	Emotion-Inference	male	19	disgust	1	m6	0	AU10	targeted	Emotion-Inference	sadness	0
1064258	Emotion-Inference	male	19	fear	1	f3	0	AU2	non-targeted	Emotion-Inference	fear	1
1064258	Emotion-Inference	male	19	fear	1	f3	0	AU10	non-targeted	Emotion-Inference	fear	1
1064258	Emotion-Inference	male	19	fear	1	f3	0	AU12	non-targeted	Emotion-Inference	fear	1
1064258	Emotion-Inference	male	19	fear	1	f3	0	AU4	targeted	Emotion-Inference	fear	1
1064258	Emotion-Inference	male	19	happiness	1	m6	0	AU2	non-targeted	Emotion-Inference	happiness	1
1064258	Emotion-Inference	male	19	happiness	1	m6	0	AU4	non-targeted	Emotion-Inference	happiness	1
1064258	Emotion-Inference	male	19	happiness	1	m6	0	AU10	non-targeted	Emotion-Inference	happiness	1
1064258	Emotion-Inference	male	19	happiness	1	m6	0	AU12	targeted	Emotion-Inference	happiness	1
1064258	Emotion-Inference	male	19	sadness	1	f16	0	AU2	non-targeted	Emotion-Inference	sadness	1
1064258	Emotion-Inference	male	19	sadness	1	f16	0	AU10	non-targeted	Emotion-Inference	sadness	1
1064258	Emotion-Inference	male	19	sadness	1	f16	0	AU12	non-targeted	Emotion-Inference	sadness	1
1064258	Emotion-Inference	male	19	sadness	1	f16	0	AU4	targeted	Emotion-Inference	sadness	1
1064258	Emotion-Inference	male	19	surprise	1	f3	0	AU4	non-targeted	Emotion-Inference	surprise	1
1064258	Emotion-Inference	male	19	surprise	1	f3	0	AU10	non-targeted	Emotion-Inference	surprise	1
1064258	Emotion-Inference	male	19	surprise	1	f3	0	AU12	non-targeted	Emotion-Inference	surprise	1
1064258	Emotion-Inference	male	19	surprise	1	f3	0	AU2	targeted	Emotion-Inference	surprise	1
1064258	Emotion-Inference	male	19	anger	2	m9	0	AU2	non-targeted	Emotion-Inference	anger	1
1064258	Emotion-Inference	male	19	anger	2	m9	0	AU10	non-targeted	Emotion-Inference	anger	1
1064258	Emotion-Inference	male	19	anger	2	m9	0	AU12	non-targeted	Emotion-Inference	anger	1
1064258	Emotion-Inference	male	19	anger	2	m9	0	AU4	targeted	Emotion-Inference	anger	1
1064258	Emotion-Inference	male	19	disgust	2	f3	0	AU2	non-targeted	Emotion-Inference	disgust	1
1064258	Emotion-Inference	male	19	disgust	2	f3	0	AU12	non-targeted	Emotion-Inference	disgust	1
1064258	Emotion-Inference	male	19	disgust	2	f3	0	AU4	targeted	Emotion-Inference	disgust	1
1064258	Emotion-Inference	male	19	disgust	2	f3	0	AU10	targeted	Emotion-Inference	disgust	1
1064258	Emotion-Inference	male	19	fear	2	m9	0	AU2	non-targeted	Emotion-Inference	fear	1
1064258	Emotion-Inference	male	19	fear	2	m9	0	AU10	non-targeted	Emotion-Inference	fear	1
1064258	Emotion-Inference	male	19	fear	2	m9	0	AU12	non-targeted	Emotion-Inference	fear	1
1064258	Emotion-Inference	male	19	fear	2	m9	0	AU4	targeted	Emotion-Inference	fear	1
1064258	Emotion-Inference	male	19	happiness	2	f16	0	AU2	non-targeted	Emotion-Inference	happiness	1
1064258	Emotion-Inference	male	19	happiness	2	f16	0	AU4	non-targeted	Emotion-Inference	happiness	1
1064258	Emotion-Inference	male	19	happiness	2	f16	0	AU10	non-targeted	Emotion-Inference	happiness	1
1064258	Emotion-Inference	male	19	happiness	2	f16	0	AU12	targeted	Emotion-Inference	happiness	1
1064258	Emotion-Inference	male	19	sadness	2	m9	0	AU2	non-targeted	Emotion-Inference	sadness	1
1064258	Emotion-Inference	male	19	sadness	2	m9	0	AU10	non-targeted	Emotion-Inference	sadness	1
1064258	Emotion-Inference	male	19	sadness	2	m9	0	AU12	non-targeted	Emotion-Inference	sadness	1
1064258	Emotion-Inference	male	19	sadness	2	m9	0	AU4	targeted	Emotion-Inference	sadness	1
1064258	Emotion-Inference	male	19	surprise	2	m9	0	AU4	non-targeted	Emotion-Inference	surprise	1
1064258	Emotion-Inference	male	19	surprise	2	m9	0	AU10	non-targeted	Emotion-Inference	surprise	1
1064258	Emotion-Inference	male	19	surprise	2	m9	0	AU12	non-targeted	Emotion-Inference	surprise	1
1064258	Emotion-Inference	male	19	surprise	2	m9	0	AU2	targeted	Emotion-Inference	surprise	1
1064258	Emotion-Inference	male	19	anger	3	f13	0	AU2	non-targeted	Emotion-Inference	anger	1
1064258	Emotion-Inference	male	19	anger	3	f13	0	AU10	non-targeted	Emotion-Inference	anger	1
1064258	Emotion-Inference	male	19	anger	3	f13	0	AU12	non-targeted	Emotion-Inference	anger	1
1064258	Emotion-Inference	male	19	anger	3	f13	0	AU4	targeted	Emotion-Inference	anger	1
1064258	Emotion-Inference	male	19	disgust	3	m1	0	AU2	non-targeted	Emotion-Inference	disgust	1
1064258	Emotion-Inference	male	19	disgust	3	m1	0	AU12	non-targeted	Emotion-Inference	disgust	1
1064258	Emotion-Inference	male	19	disgust	3	m1	0	AU4	targeted	Emotion-Inference	disgust	1
1064258	Emotion-Inference	male	19	disgust	3	m1	0	AU10	targeted	Emotion-Inference	disgust	1
1064258	Emotion-Inference	male	19	fear	3	f13	0	AU2	non-targeted	Emotion-Inference	fear	1
1064258	Emotion-Inference	male	19	fear	3	f13	0	AU10	non-targeted	Emotion-Inference	fear	1
1064258	Emotion-Inference	male	19	fear	3	f13	0	AU12	non-targeted	Emotion-Inference	fear	1
1064258	Emotion-Inference	male	19	fear	3	f13	0	AU4	targeted	Emotion-Inference	fear	1
1064258	Emotion-Inference	male	19	happiness	3	f10	0	AU2	non-targeted	Emotion-Inference	happiness	1
1064258	Emotion-Inference	male	19	happiness	3	f10	0	AU4	non-targeted	Emotion-Inference	happiness	1
1064258	Emotion-Inference	male	19	happiness	3	f10	0	AU10	non-targeted	Emotion-Inference	happiness	1
1064258	Emotion-Inference	male	19	happiness	3	f10	0	AU12	targeted	Emotion-Inference	happiness	1
1064258	Emotion-Inference	male	19	sadness	3	f10	0	AU2	non-targeted	Emotion-Inference	sadness	1
1064258	Emotion-Inference	male	19	sadness	3	f10	0	AU10	non-targeted	Emotion-Inference	sadness	1
1064258	Emotion-Inference	male	19	sadness	3	f10	0	AU12	non-targeted	Emotion-Inference	sadness	1
1064258	Emotion-Inference	male	19	sadness	3	f10	0	AU4	targeted	Emotion-Inference	sadness	1
1064258	Emotion-Inference	male	19	surprise	3	f10	0	AU4	non-targeted	Emotion-Inference	surprise	1
1064258	Emotion-Inference	male	19	surprise	3	f10	0	AU10	non-targeted	Emotion-Inference	surprise	1
1064258	Emotion-Inference	male	19	surprise	3	f10	0	AU12	non-targeted	Emotion-Inference	surprise	1
1064258	Emotion-Inference	male	19	surprise	3	f10	0	AU2	targeted	Emotion-Inference	surprise	1
1064258	Emotion-Inference	male	19	anger	4	m10	0	AU2	non-targeted	Emotion-Inference	anger	1
1064258	Emotion-Inference	male	19	anger	4	m10	0	AU10	non-targeted	Emotion-Inference	anger	1
1064258	Emotion-Inference	male	19	anger	4	m10	0	AU12	non-targeted	Emotion-Inference	anger	1
1064258	Emotion-Inference	male	19	anger	4	m10	0	AU4	targeted	Emotion-Inference	anger	1
1064258	Emotion-Inference	male	19	disgust	4	f13	0	AU2	non-targeted	Emotion-Inference	disgust	1
1064258	Emotion-Inference	male	19	disgust	4	f13	0	AU12	non-targeted	Emotion-Inference	disgust	1
1064258	Emotion-Inference	male	19	disgust	4	f13	0	AU4	targeted	Emotion-Inference	disgust	1
1064258	Emotion-Inference	male	19	disgust	4	f13	0	AU10	targeted	Emotion-Inference	disgust	1
1064258	Emotion-Inference	male	19	fear	4	m10	0	AU2	non-targeted	Emotion-Inference	fear	1
1064258	Emotion-Inference	male	19	fear	4	m10	0	AU10	non-targeted	Emotion-Inference	fear	1
1064258	Emotion-Inference	male	19	fear	4	m10	0	AU12	non-targeted	Emotion-Inference	fear	1
1064258	Emotion-Inference	male	19	fear	4	m10	0	AU4	targeted	Emotion-Inference	fear	1
1064258	Emotion-Inference	male	19	happiness	4	m1	0	AU2	non-targeted	Emotion-Inference	happiness	1
1064258	Emotion-Inference	male	19	happiness	4	m1	0	AU4	non-targeted	Emotion-Inference	happiness	1
1064258	Emotion-Inference	male	19	happiness	4	m1	0	AU10	non-targeted	Emotion-Inference	happiness	1
1064258	Emotion-Inference	male	19	happiness	4	m1	0	AU12	targeted	Emotion-Inference	happiness	1
1064258	Emotion-Inference	male	19	sadness	4	m1	0	AU2	non-targeted	Emotion-Inference	sadness	1
1064258	Emotion-Inference	male	19	sadness	4	m1	0	AU10	non-targeted	Emotion-Inference	sadness	1
1064258	Emotion-Inference	male	19	sadness	4	m1	0	AU12	non-targeted	Emotion-Inference	sadness	1
1064258	Emotion-Inference	male	19	sadness	4	m1	0	AU4	targeted	Emotion-Inference	sadness	1
1064258	Emotion-Inference	male	19	surprise	4	m10	0	AU4	non-targeted	Emotion-Inference	surprise	1
1064258	Emotion-Inference	male	19	surprise	4	m10	0	AU10	non-targeted	Emotion-Inference	surprise	1
1064258	Emotion-Inference	male	19	surprise	4	m10	0	AU12	non-targeted	Emotion-Inference	surprise	1
1064258	Emotion-Inference	male	19	surprise	4	m10	0	AU2	targeted	Emotion-Inference	surprise	1
1064265	Emotion-Inference	male	18	anger	1	m10	0	AU2	non-targeted	Emotion-Inference	anger	1
1064265	Emotion-Inference	male	18	anger	1	m10	0	AU10	non-targeted	Emotion-Inference	anger	1
1064265	Emotion-Inference	male	18	anger	1	m10	0	AU12	non-targeted	Emotion-Inference	anger	1
1064265	Emotion-Inference	male	18	anger	1	m10	0	AU4	targeted	Emotion-Inference	anger	1
1064265	Emotion-Inference	male	18	disgust	1	f13	0	AU2	non-targeted	Emotion-Inference	disgust	1
1064265	Emotion-Inference	male	18	disgust	1	f13	0	AU12	non-targeted	Emotion-Inference	disgust	1
1064265	Emotion-Inference	male	18	disgust	1	f13	1	AU4	targeted	Emotion-Inference	disgust	1
1064265	Emotion-Inference	male	18	disgust	1	f13	0	AU10	targeted	Emotion-Inference	disgust	1
1064265	Emotion-Inference	male	18	fear	1	m10	0	AU2	non-targeted	Emotion-Inference	surprise	0
1064265	Emotion-Inference	male	18	fear	1	m10	0	AU10	non-targeted	Emotion-Inference	surprise	0
1064265	Emotion-Inference	male	18	fear	1	m10	0	AU12	non-targeted	Emotion-Inference	surprise	0
1064265	Emotion-Inference	male	18	fear	1	m10	0	AU4	targeted	Emotion-Inference	surprise	0
1064265	Emotion-Inference	male	18	happiness	1	m1	0	AU2	non-targeted	Emotion-Inference	happiness	1
1064265	Emotion-Inference	male	18	happiness	1	m1	0	AU4	non-targeted	Emotion-Inference	happiness	1
1064265	Emotion-Inference	male	18	happiness	1	m1	0	AU10	non-targeted	Emotion-Inference	happiness	1
1064265	Emotion-Inference	male	18	happiness	1	m1	1	AU12	targeted	Emotion-Inference	happiness	1
1064265	Emotion-Inference	male	18	sadness	1	m1	0	AU2	non-targeted	Emotion-Inference	sadness	1
1064265	Emotion-Inference	male	18	sadness	1	m1	0	AU10	non-targeted	Emotion-Inference	sadness	1
1064265	Emotion-Inference	male	18	sadness	1	m1	1	AU12	non-targeted	Emotion-Inference	sadness	1
1064265	Emotion-Inference	male	18	sadness	1	m1	0	AU4	targeted	Emotion-Inference	sadness	1
1064265	Emotion-Inference	male	18	surprise	1	m10	0	AU4	non-targeted	Emotion-Inference	anger	0
1064265	Emotion-Inference	male	18	surprise	1	m10	0	AU10	non-targeted	Emotion-Inference	anger	0
1064265	Emotion-Inference	male	18	surprise	1	m10	0	AU12	non-targeted	Emotion-Inference	anger	0
1064265	Emotion-Inference	male	18	surprise	1	m10	1	AU2	targeted	Emotion-Inference	anger	0
1064265	Emotion-Inference	male	18	anger	2	f13	0	AU2	non-targeted	Emotion-Inference	anger	1
1064265	Emotion-Inference	male	18	anger	2	f13	0	AU10	non-targeted	Emotion-Inference	anger	1
1064265	Emotion-Inference	male	18	anger	2	f13	0	AU12	non-targeted	Emotion-Inference	anger	1
1064265	Emotion-Inference	male	18	anger	2	f13	1	AU4	targeted	Emotion-Inference	anger	1
1064265	Emotion-Inference	male	18	disgust	2	m1	0	AU2	non-targeted	Emotion-Inference	anger	0
1064265	Emotion-Inference	male	18	disgust	2	m1	0	AU12	non-targeted	Emotion-Inference	anger	0
1064265	Emotion-Inference	male	18	disgust	2	m1	0	AU4	targeted	Emotion-Inference	anger	0
1064265	Emotion-Inference	male	18	disgust	2	m1	0	AU10	targeted	Emotion-Inference	anger	0
1064265	Emotion-Inference	male	18	fear	2	f13	1	AU2	non-targeted	Emotion-Inference	disgust	0
1064265	Emotion-Inference	male	18	fear	2	f13	0	AU10	non-targeted	Emotion-Inference	disgust	0
1064265	Emotion-Inference	male	18	fear	2	f13	0	AU12	non-targeted	Emotion-Inference	disgust	0
1064265	Emotion-Inference	male	18	fear	2	f13	0	AU4	targeted	Emotion-Inference	disgust	0
1064265	Emotion-Inference	male	18	happiness	2	f10	0	AU2	non-targeted	Emotion-Inference	happiness	1
1064265	Emotion-Inference	male	18	happiness	2	f10	0	AU4	non-targeted	Emotion-Inference	happiness	1
1064265	Emotion-Inference	male	18	happiness	2	f10	0	AU10	non-targeted	Emotion-Inference	happiness	1
1064265	Emotion-Inference	male	18	happiness	2	f10	0	AU12	targeted	Emotion-Inference	happiness	1
1064265	Emotion-Inference	male	18	sadness	2	f10	1	AU2	non-targeted	Emotion-Inference	disgust	0
1064265	Emotion-Inference	male	18	sadness	2	f10	0	AU10	non-targeted	Emotion-Inference	disgust	0
1064265	Emotion-Inference	male	18	sadness	2	f10	0	AU12	non-targeted	Emotion-Inference	disgust	0
1064265	Emotion-Inference	male	18	sadness	2	f10	0	AU4	targeted	Emotion-Inference	disgust	0
1064265	Emotion-Inference	male	18	surprise	2	f10	0	AU4	non-targeted	Emotion-Inference	surprise	1
1064265	Emotion-Inference	male	18	surprise	2	f10	0	AU10	non-targeted	Emotion-Inference	surprise	1
1064265	Emotion-Inference	male	18	surprise	2	f10	0	AU12	non-targeted	Emotion-Inference	surprise	1
1064265	Emotion-Inference	male	18	surprise	2	f10	1	AU2	targeted	Emotion-Inference	surprise	1
1064265	Emotion-Inference	male	18	anger	3	m9	1	AU2	non-targeted	Emotion-Inference	anger	1
1064265	Emotion-Inference	male	18	anger	3	m9	0	AU10	non-targeted	Emotion-Inference	anger	1
1064265	Emotion-Inference	male	18	anger	3	m9	0	AU12	non-targeted	Emotion-Inference	anger	1
1064265	Emotion-Inference	male	18	anger	3	m9	0	AU4	targeted	Emotion-Inference	anger	1
1064265	Emotion-Inference	male	18	disgust	3	f3	1	AU2	non-targeted	Emotion-Inference	anger	0
1064265	Emotion-Inference	male	18	disgust	3	f3	0	AU12	non-targeted	Emotion-Inference	anger	0
1064265	Emotion-Inference	male	18	disgust	3	f3	0	AU4	targeted	Emotion-Inference	anger	0
1064265	Emotion-Inference	male	18	disgust	3	f3	0	AU10	targeted	Emotion-Inference	anger	0
1064265	Emotion-Inference	male	18	fear	3	m9	1	AU2	non-targeted	Emotion-Inference	fear	1
1064265	Emotion-Inference	male	18	fear	3	m9	0	AU10	non-targeted	Emotion-Inference	fear	1
1064265	Emotion-Inference	male	18	fear	3	m9	0	AU12	non-targeted	Emotion-Inference	fear	1
1064265	Emotion-Inference	male	18	fear	3	m9	0	AU4	targeted	Emotion-Inference	fear	1
1064265	Emotion-Inference	male	18	happiness	3	f16	0	AU2	non-targeted	Emotion-Inference	happiness	1
1064265	Emotion-Inference	male	18	happiness	3	f16	0	AU4	non-targeted	Emotion-Inference	happiness	1
1064265	Emotion-Inference	male	18	happiness	3	f16	0	AU10	non-targeted	Emotion-Inference	happiness	1
1064265	Emotion-Inference	male	18	happiness	3	f16	1	AU12	targeted	Emotion-Inference	happiness	1
1064265	Emotion-Inference	male	18	sadness	3	m9	1	AU2	non-targeted	Emotion-Inference	disgust	0
1064265	Emotion-Inference	male	18	sadness	3	m9	1	AU10	non-targeted	Emotion-Inference	disgust	0
1064265	Emotion-Inference	male	18	sadness	3	m9	0	AU12	non-targeted	Emotion-Inference	disgust	0
1064265	Emotion-Inference	male	18	sadness	3	m9	0	AU4	targeted	Emotion-Inference	disgust	0
1064265	Emotion-Inference	male	18	surprise	3	m9	0	AU4	non-targeted	Emotion-Inference	surprise	1
1064265	Emotion-Inference	male	18	surprise	3	m9	0	AU10	non-targeted	Emotion-Inference	surprise	1
1064265	Emotion-Inference	male	18	surprise	3	m9	0	AU12	non-targeted	Emotion-Inference	surprise	1
1064265	Emotion-Inference	male	18	surprise	3	m9	1	AU2	targeted	Emotion-Inference	surprise	1
1064265	Emotion-Inference	male	18	anger	4	f3	1	AU2	non-targeted	Emotion-Inference	anger	1
1064265	Emotion-Inference	male	18	anger	4	f3	0	AU10	non-targeted	Emotion-Inference	anger	1
1064265	Emotion-Inference	male	18	anger	4	f3	0	AU12	non-targeted	Emotion-Inference	anger	1
1064265	Emotion-Inference	male	18	anger	4	f3	0	AU4	targeted	Emotion-Inference	anger	1
1064265	Emotion-Inference	male	18	disgust	4	m6	0	AU2	non-targeted	Emotion-Inference	disgust	1
1064265	Emotion-Inference	male	18	disgust	4	m6	0	AU12	non-targeted	Emotion-Inference	disgust	1
1064265	Emotion-Inference	male	18	disgust	4	m6	1	AU4	targeted	Emotion-Inference	disgust	1
1064265	Emotion-Inference	male	18	disgust	4	m6	0	AU10	targeted	Emotion-Inference	disgust	1
1064265	Emotion-Inference	male	18	fear	4	f3	0	AU2	non-targeted	Emotion-Inference	anger	0
1064265	Emotion-Inference	male	18	fear	4	f3	0	AU10	non-targeted	Emotion-Inference	anger	0
1064265	Emotion-Inference	male	18	fear	4	f3	0	AU12	non-targeted	Emotion-Inference	anger	0
1064265	Emotion-Inference	male	18	fear	4	f3	1	AU4	targeted	Emotion-Inference	anger	0
1064265	Emotion-Inference	male	18	happiness	4	m6	0	AU2	non-targeted	Emotion-Inference	happiness	1
1064265	Emotion-Inference	male	18	happiness	4	m6	0	AU4	non-targeted	Emotion-Inference	happiness	1
1064265	Emotion-Inference	male	18	happiness	4	m6	0	AU10	non-targeted	Emotion-Inference	happiness	1
1064265	Emotion-Inference	male	18	happiness	4	m6	1	AU12	targeted	Emotion-Inference	happiness	1
1064265	Emotion-Inference	male	18	sadness	4	f16	1	AU2	non-targeted	Emotion-Inference	disgust	0
1064265	Emotion-Inference	male	18	sadness	4	f16	0	AU10	non-targeted	Emotion-Inference	disgust	0
1064265	Emotion-Inference	male	18	sadness	4	f16	0	AU12	non-targeted	Emotion-Inference	disgust	0
1064265	Emotion-Inference	male	18	sadness	4	f16	1	AU4	targeted	Emotion-Inference	disgust	0
1064265	Emotion-Inference	male	18	surprise	4	f3	0	AU4	non-targeted	Emotion-Inference	surprise	1
1064265	Emotion-Inference	male	18	surprise	4	f3	0	AU10	non-targeted	Emotion-Inference	surprise	1
1064265	Emotion-Inference	male	18	surprise	4	f3	0	AU12	non-targeted	Emotion-Inference	surprise	1
1064265	Emotion-Inference	male	18	surprise	4	f3	1	AU2	targeted	Emotion-Inference	surprise	1
1064297	Emotion-Inference	male	18	anger	1	f3	0	AU2	non-targeted	Emotion-Inference	anger	1
1064297	Emotion-Inference	male	18	anger	1	f3	0	AU10	non-targeted	Emotion-Inference	anger	1
1064297	Emotion-Inference	male	18	anger	1	f3	0	AU12	non-targeted	Emotion-Inference	anger	1
1064297	Emotion-Inference	male	18	anger	1	f3	0	AU4	targeted	Emotion-Inference	anger	1
1064297	Emotion-Inference	male	18	disgust	1	m6	0	AU2	non-targeted	Emotion-Inference	disgust	1
1064297	Emotion-Inference	male	18	disgust	1	m6	0	AU12	non-targeted	Emotion-Inference	disgust	1
1064297	Emotion-Inference	male	18	disgust	1	m6	0	AU4	targeted	Emotion-Inference	disgust	1
1064297	Emotion-Inference	male	18	disgust	1	m6	0	AU10	targeted	Emotion-Inference	disgust	1
1064297	Emotion-Inference	male	18	fear	1	f3	0	AU2	non-targeted	Emotion-Inference	surprise	0
1064297	Emotion-Inference	male	18	fear	1	f3	0	AU10	non-targeted	Emotion-Inference	surprise	0
1064297	Emotion-Inference	male	18	fear	1	f3	0	AU12	non-targeted	Emotion-Inference	surprise	0
1064297	Emotion-Inference	male	18	fear	1	f3	0	AU4	targeted	Emotion-Inference	surprise	0
1064297	Emotion-Inference	male	18	happiness	1	m6	0	AU2	non-targeted	Emotion-Inference	happiness	1
1064297	Emotion-Inference	male	18	happiness	1	m6	0	AU4	non-targeted	Emotion-Inference	happiness	1
1064297	Emotion-Inference	male	18	happiness	1	m6	0	AU10	non-targeted	Emotion-Inference	happiness	1
1064297	Emotion-Inference	male	18	happiness	1	m6	0	AU12	targeted	Emotion-Inference	happiness	1
1064297	Emotion-Inference	male	18	sadness	1	f16		AU2	non-targeted	Emotion-Inference	disgust	0
1064297	Emotion-Inference	male	18	sadness	1	f16	0	AU10	non-targeted	Emotion-Inference	disgust	0
1064297	Emotion-Inference	male	18	sadness	1	f16	0	AU12	non-targeted	Emotion-Inference	disgust	0
1064297	Emotion-Inference	male	18	sadness	1	f16		AU4	targeted	Emotion-Inference	disgust	0
1064297	Emotion-Inference	male	18	surprise	1	f3	0	AU4	non-targeted	Emotion-Inference	surprise	1
1064297	Emotion-Inference	male	18	surprise	1	f3		AU10	non-targeted	Emotion-Inference	surprise	1
1064297	Emotion-Inference	male	18	surprise	1	f3	1	AU12	non-targeted	Emotion-Inference	surprise	1
1064297	Emotion-Inference	male	18	surprise	1	f3	0	AU2	targeted	Emotion-Inference	surprise	1
1064297	Emotion-Inference	male	18	anger	2	m9		AU2	non-targeted	Emotion-Inference	anger	1
1064297	Emotion-Inference	male	18	anger	2	m9	0	AU10	non-targeted	Emotion-Inference	anger	1
1064297	Emotion-Inference	male	18	anger	2	m9	0	AU12	non-targeted	Emotion-Inference	anger	1
1064297	Emotion-Inference	male	18	anger	2	m9	0	AU4	targeted	Emotion-Inference	anger	1
1064297	Emotion-Inference	male	18	disgust	2	f3	0	AU2	non-targeted	Emotion-Inference	disgust	1
1064297	Emotion-Inference	male	18	disgust	2	f3	0	AU12	non-targeted	Emotion-Inference	disgust	1
1064297	Emotion-Inference	male	18	disgust	2	f3	0	AU4	targeted	Emotion-Inference	disgust	1
1064297	Emotion-Inference	male	18	disgust	2	f3	0	AU10	targeted	Emotion-Inference	disgust	1
1064297	Emotion-Inference	male	18	fear	2	m9	0	AU2	non-targeted	Emotion-Inference	fear	1
1064297	Emotion-Inference	male	18	fear	2	m9	0	AU10	non-targeted	Emotion-Inference	fear	1
1064297	Emotion-Inference	male	18	fear	2	m9	0	AU12	non-targeted	Emotion-Inference	fear	1
1064297	Emotion-Inference	male	18	fear	2	m9	0	AU4	targeted	Emotion-Inference	fear	1
1064297	Emotion-Inference	male	18	happiness	2	f16	0	AU2	non-targeted	Emotion-Inference	happiness	1
1064297	Emotion-Inference	male	18	happiness	2	f16	0	AU4	non-targeted	Emotion-Inference	happiness	1
1064297	Emotion-Inference	male	18	happiness	2	f16		AU10	non-targeted	Emotion-Inference	happiness	1
1064297	Emotion-Inference	male	18	happiness	2	f16	0	AU12	targeted	Emotion-Inference	happiness	1
1064297	Emotion-Inference	male	18	sadness	2	m9	0	AU2	non-targeted	Emotion-Inference	sadness	1
1064297	Emotion-Inference	male	18	sadness	2	m9	0	AU10	non-targeted	Emotion-Inference	sadness	1
1064297	Emotion-Inference	male	18	sadness	2	m9	0	AU12	non-targeted	Emotion-Inference	sadness	1
1064297	Emotion-Inference	male	18	sadness	2	m9	1	AU4	targeted	Emotion-Inference	sadness	1
1064297	Emotion-Inference	male	18	surprise	2	m9	0	AU4	non-targeted	Emotion-Inference	surprise	1
1064297	Emotion-Inference	male	18	surprise	2	m9	0	AU10	non-targeted	Emotion-Inference	surprise	1
1064297	Emotion-Inference	male	18	surprise	2	m9	0	AU12	non-targeted	Emotion-Inference	surprise	1
1064297	Emotion-Inference	male	18	surprise	2	m9	0	AU2	targeted	Emotion-Inference	surprise	1
1064297	Emotion-Inference	male	18	anger	3	f13	0	AU2	non-targeted	Emotion-Inference	anger	1
1064297	Emotion-Inference	male	18	anger	3	f13	0	AU10	non-targeted	Emotion-Inference	anger	1
1064297	Emotion-Inference	male	18	anger	3	f13	0	AU12	non-targeted	Emotion-Inference	anger	1
1064297	Emotion-Inference	male	18	anger	3	f13	0	AU4	targeted	Emotion-Inference	anger	1
1064297	Emotion-Inference	male	18	disgust	3	m1	0	AU2	non-targeted	Emotion-Inference	disgust	1
1064297	Emotion-Inference	male	18	disgust	3	m1	0	AU12	non-targeted	Emotion-Inference	disgust	1
1064297	Emotion-Inference	male	18	disgust	3	m1	0	AU4	targeted	Emotion-Inference	disgust	1
1064297	Emotion-Inference	male	18	disgust	3	m1	0	AU10	targeted	Emotion-Inference	disgust	1
1064297	Emotion-Inference	male	18	fear	3	f13	0	AU2	non-targeted	Emotion-Inference	fear	1
1064297	Emotion-Inference	male	18	fear	3	f13	0	AU10	non-targeted	Emotion-Inference	fear	1
1064297	Emotion-Inference	male	18	fear	3	f13	0	AU12	non-targeted	Emotion-Inference	fear	1
1064297	Emotion-Inference	male	18	fear	3	f13	0	AU4	targeted	Emotion-Inference	fear	1
1064297	Emotion-Inference	male	18	happiness	3	f10		AU2	non-targeted	Emotion-Inference	happiness	1
1064297	Emotion-Inference	male	18	happiness	3	f10	0	AU4	non-targeted	Emotion-Inference	happiness	1
1064297	Emotion-Inference	male	18	happiness	3	f10	0	AU10	non-targeted	Emotion-Inference	happiness	1
1064297	Emotion-Inference	male	18	happiness	3	f10	0	AU12	targeted	Emotion-Inference	happiness	1
1064297	Emotion-Inference	male	18	sadness	3	f10	0	AU2	non-targeted	Emotion-Inference	disgust	0
1064297	Emotion-Inference	male	18	sadness	3	f10	0	AU10	non-targeted	Emotion-Inference	disgust	0
1064297	Emotion-Inference	male	18	sadness	3	f10	0	AU12	non-targeted	Emotion-Inference	disgust	0
1064297	Emotion-Inference	male	18	sadness	3	f10	1	AU4	targeted	Emotion-Inference	disgust	0
1064297	Emotion-Inference	male	18	surprise	3	f10	0	AU4	non-targeted	Emotion-Inference	surprise	1
1064297	Emotion-Inference	male	18	surprise	3	f10	0	AU10	non-targeted	Emotion-Inference	surprise	1
1064297	Emotion-Inference	male	18	surprise	3	f10	0	AU12	non-targeted	Emotion-Inference	surprise	1
1064297	Emotion-Inference	male	18	surprise	3	f10	0	AU2	targeted	Emotion-Inference	surprise	1
1064297	Emotion-Inference	male	18	anger	4	m10	0	AU2	non-targeted	Emotion-Inference	anger	1
1064297	Emotion-Inference	male	18	anger	4	m10	1	AU10	non-targeted	Emotion-Inference	anger	1
1064297	Emotion-Inference	male	18	anger	4	m10	0	AU12	non-targeted	Emotion-Inference	anger	1
1064297	Emotion-Inference	male	18	anger	4	m10	0	AU4	targeted	Emotion-Inference	anger	1
1064297	Emotion-Inference	male	18	disgust	4	f13	0	AU2	non-targeted	Emotion-Inference	disgust	1
1064297	Emotion-Inference	male	18	disgust	4	f13	0	AU12	non-targeted	Emotion-Inference	disgust	1
1064297	Emotion-Inference	male	18	disgust	4	f13	1	AU4	targeted	Emotion-Inference	disgust	1
1064297	Emotion-Inference	male	18	disgust	4	f13	0	AU10	targeted	Emotion-Inference	disgust	1
1064297	Emotion-Inference	male	18	fear	4	m10	0	AU2	non-targeted	Emotion-Inference	disgust	0
1064297	Emotion-Inference	male	18	fear	4	m10	0	AU10	non-targeted	Emotion-Inference	disgust	0
1064297	Emotion-Inference	male	18	fear	4	m10	0	AU12	non-targeted	Emotion-Inference	disgust	0
1064297	Emotion-Inference	male	18	fear	4	m10	0	AU4	targeted	Emotion-Inference	disgust	0
1064297	Emotion-Inference	male	18	happiness	4	m1	0	AU2	non-targeted	Emotion-Inference	happiness	1
1064297	Emotion-Inference	male	18	happiness	4	m1	0	AU4	non-targeted	Emotion-Inference	happiness	1
1064297	Emotion-Inference	male	18	happiness	4	m1	0	AU10	non-targeted	Emotion-Inference	happiness	1
1064297	Emotion-Inference	male	18	happiness	4	m1	0	AU12	targeted	Emotion-Inference	happiness	1
1064297	Emotion-Inference	male	18	sadness	4	m1	0	AU2	non-targeted	Emotion-Inference	sadness	1
1064297	Emotion-Inference	male	18	sadness	4	m1	0	AU10	non-targeted	Emotion-Inference	sadness	1
1064297	Emotion-Inference	male	18	sadness	4	m1	0	AU12	non-targeted	Emotion-Inference	sadness	1
1064297	Emotion-Inference	male	18	sadness	4	m1		AU4	targeted	Emotion-Inference	sadness	1
1064297	Emotion-Inference	male	18	surprise	4	m10	0	AU4	non-targeted	Emotion-Inference	surprise	1
1064297	Emotion-Inference	male	18	surprise	4	m10	0	AU10	non-targeted	Emotion-Inference	surprise	1
1064297	Emotion-Inference	male	18	surprise	4	m10	0	AU12	non-targeted	Emotion-Inference	surprise	1
1064297	Emotion-Inference	male	18	surprise	4	m10	0	AU2	targeted	Emotion-Inference	surprise	1
1064481	Emotion-Inference	male	19	anger	1	m10	0	AU2	non-targeted	Emotion-Inference	anger	1
1064481	Emotion-Inference	male	19	anger	1	m10	0	AU10	non-targeted	Emotion-Inference	anger	1
1064481	Emotion-Inference	male	19	anger	1	m10	0	AU12	non-targeted	Emotion-Inference	anger	1
1064481	Emotion-Inference	male	19	anger	1	m10	0	AU4	targeted	Emotion-Inference	anger	1
1064481	Emotion-Inference	male	19	disgust	1	f13	0	AU2	non-targeted	Emotion-Inference	sadness	0
1064481	Emotion-Inference	male	19	disgust	1	f13	0	AU12	non-targeted	Emotion-Inference	sadness	0
1064481	Emotion-Inference	male	19	disgust	1	f13	0	AU4	targeted	Emotion-Inference	sadness	0
1064481	Emotion-Inference	male	19	disgust	1	f13	0	AU10	targeted	Emotion-Inference	sadness	0
1064481	Emotion-Inference	male	19	fear	1	m10	0	AU2	non-targeted	Emotion-Inference	disgust	0
1064481	Emotion-Inference	male	19	fear	1	m10	0	AU10	non-targeted	Emotion-Inference	disgust	0
1064481	Emotion-Inference	male	19	fear	1	m10	0	AU12	non-targeted	Emotion-Inference	disgust	0
1064481	Emotion-Inference	male	19	fear	1	m10	0	AU4	targeted	Emotion-Inference	disgust	0
1064481	Emotion-Inference	male	19	happiness	1	m1	0	AU2	non-targeted	Emotion-Inference	happiness	1
1064481	Emotion-Inference	male	19	happiness	1	m1	0	AU4	non-targeted	Emotion-Inference	happiness	1
1064481	Emotion-Inference	male	19	happiness	1	m1	0	AU10	non-targeted	Emotion-Inference	happiness	1
1064481	Emotion-Inference	male	19	happiness	1	m1	0	AU12	targeted	Emotion-Inference	happiness	1
1064481	Emotion-Inference	male	19	sadness	1	m1	0	AU2	non-targeted	Emotion-Inference	sadness	1
1064481	Emotion-Inference	male	19	sadness	1	m1	0	AU10	non-targeted	Emotion-Inference	sadness	1
1064481	Emotion-Inference	male	19	sadness	1	m1	0	AU12	non-targeted	Emotion-Inference	sadness	1
1064481	Emotion-Inference	male	19	sadness	1	m1	0	AU4	targeted	Emotion-Inference	sadness	1
1064481	Emotion-Inference	male	19	surprise	1	m10	0	AU4	non-targeted	Emotion-Inference	surprise	1
1064481	Emotion-Inference	male	19	surprise	1	m10	0	AU10	non-targeted	Emotion-Inference	surprise	1
1064481	Emotion-Inference	male	19	surprise	1	m10	0	AU12	non-targeted	Emotion-Inference	surprise	1
1064481	Emotion-Inference	male	19	surprise	1	m10	0	AU2	targeted	Emotion-Inference	surprise	1
1064481	Emotion-Inference	male	19	anger	2	f13	0	AU2	non-targeted	Emotion-Inference	anger	1
1064481	Emotion-Inference	male	19	anger	2	f13	0	AU10	non-targeted	Emotion-Inference	anger	1
1064481	Emotion-Inference	male	19	anger	2	f13	0	AU12	non-targeted	Emotion-Inference	anger	1
1064481	Emotion-Inference	male	19	anger	2	f13	0	AU4	targeted	Emotion-Inference	anger	1
1064481	Emotion-Inference	male	19	disgust	2	m1	0	AU2	non-targeted	Emotion-Inference	anger	0
1064481	Emotion-Inference	male	19	disgust	2	m1	0	AU12	non-targeted	Emotion-Inference	anger	0
1064481	Emotion-Inference	male	19	disgust	2	m1	0	AU4	targeted	Emotion-Inference	anger	0
1064481	Emotion-Inference	male	19	disgust	2	m1	0	AU10	targeted	Emotion-Inference	anger	0
1064481	Emotion-Inference	male	19	fear	2	f13	0	AU2	non-targeted	Emotion-Inference	disgust	0
1064481	Emotion-Inference	male	19	fear	2	f13	0	AU10	non-targeted	Emotion-Inference	disgust	0
1064481	Emotion-Inference	male	19	fear	2	f13	0	AU12	non-targeted	Emotion-Inference	disgust	0
1064481	Emotion-Inference	male	19	fear	2	f13	0	AU4	targeted	Emotion-Inference	disgust	0
1064481	Emotion-Inference	male	19	happiness	2	f10	0	AU2	non-targeted	Emotion-Inference	happiness	1
1064481	Emotion-Inference	male	19	happiness	2	f10	0	AU4	non-targeted	Emotion-Inference	happiness	1
1064481	Emotion-Inference	male	19	happiness	2	f10	0	AU10	non-targeted	Emotion-Inference	happiness	1
1064481	Emotion-Inference	male	19	happiness	2	f10	0	AU12	targeted	Emotion-Inference	happiness	1
1064481	Emotion-Inference	male	19	sadness	2	f10	0	AU2	non-targeted	Emotion-Inference	disgust	0
1064481	Emotion-Inference	male	19	sadness	2	f10	0	AU10	non-targeted	Emotion-Inference	disgust	0
1064481	Emotion-Inference	male	19	sadness	2	f10	0	AU12	non-targeted	Emotion-Inference	disgust	0
1064481	Emotion-Inference	male	19	sadness	2	f10	0	AU4	targeted	Emotion-Inference	disgust	0
1064481	Emotion-Inference	male	19	surprise	2	f10	0	AU4	non-targeted	Emotion-Inference	surprise	1
1064481	Emotion-Inference	male	19	surprise	2	f10	0	AU10	non-targeted	Emotion-Inference	surprise	1
1064481	Emotion-Inference	male	19	surprise	2	f10	0	AU12	non-targeted	Emotion-Inference	surprise	1
1064481	Emotion-Inference	male	19	surprise	2	f10	0	AU2	targeted	Emotion-Inference	surprise	1
1064481	Emotion-Inference	male	19	anger	3	m9	0	AU2	non-targeted	Emotion-Inference	anger	1
1064481	Emotion-Inference	male	19	anger	3	m9	0	AU10	non-targeted	Emotion-Inference	anger	1
1064481	Emotion-Inference	male	19	anger	3	m9	0	AU12	non-targeted	Emotion-Inference	anger	1
1064481	Emotion-Inference	male	19	anger	3	m9	0	AU4	targeted	Emotion-Inference	anger	1
1064481	Emotion-Inference	male	19	disgust	3	f3	0	AU2	non-targeted	Emotion-Inference	disgust	1
1064481	Emotion-Inference	male	19	disgust	3	f3	0	AU12	non-targeted	Emotion-Inference	disgust	1
1064481	Emotion-Inference	male	19	disgust	3	f3	0	AU4	targeted	Emotion-Inference	disgust	1
1064481	Emotion-Inference	male	19	disgust	3	f3	0	AU10	targeted	Emotion-Inference	disgust	1
1064481	Emotion-Inference	male	19	fear	3	m9	0	AU2	non-targeted	Emotion-Inference	fear	1
1064481	Emotion-Inference	male	19	fear	3	m9	0	AU10	non-targeted	Emotion-Inference	fear	1
1064481	Emotion-Inference	male	19	fear	3	m9	0	AU12	non-targeted	Emotion-Inference	fear	1
1064481	Emotion-Inference	male	19	fear	3	m9	0	AU4	targeted	Emotion-Inference	fear	1
1064481	Emotion-Inference	male	19	happiness	3	f16	0	AU2	non-targeted	Emotion-Inference	happiness	1
1064481	Emotion-Inference	male	19	happiness	3	f16	0	AU4	non-targeted	Emotion-Inference	happiness	1
1064481	Emotion-Inference	male	19	happiness	3	f16	0	AU10	non-targeted	Emotion-Inference	happiness	1
1064481	Emotion-Inference	male	19	happiness	3	f16	0	AU12	targeted	Emotion-Inference	happiness	1
1064481	Emotion-Inference	male	19	sadness	3	m9	0	AU2	non-targeted	Emotion-Inference	sadness	1
1064481	Emotion-Inference	male	19	sadness	3	m9	0	AU10	non-targeted	Emotion-Inference	sadness	1
1064481	Emotion-Inference	male	19	sadness	3	m9	0	AU12	non-targeted	Emotion-Inference	sadness	1
1064481	Emotion-Inference	male	19	sadness	3	m9	0	AU4	targeted	Emotion-Inference	sadness	1
1064481	Emotion-Inference	male	19	surprise	3	m9	0	AU4	non-targeted	Emotion-Inference	surprise	1
1064481	Emotion-Inference	male	19	surprise	3	m9	0	AU10	non-targeted	Emotion-Inference	surprise	1
1064481	Emotion-Inference	male	19	surprise	3	m9	0	AU12	non-targeted	Emotion-Inference	surprise	1
1064481	Emotion-Inference	male	19	surprise	3	m9	0	AU2	targeted	Emotion-Inference	surprise	1
1064481	Emotion-Inference	male	19	anger	4	f3	0	AU2	non-targeted	Emotion-Inference	anger	1
1064481	Emotion-Inference	male	19	anger	4	f3	0	AU10	non-targeted	Emotion-Inference	anger	1
1064481	Emotion-Inference	male	19	anger	4	f3	0	AU12	non-targeted	Emotion-Inference	anger	1
1064481	Emotion-Inference	male	19	anger	4	f3	0	AU4	targeted	Emotion-Inference	anger	1
1064481	Emotion-Inference	male	19	disgust	4	m6	0	AU2	non-targeted	Emotion-Inference	sadness	0
1064481	Emotion-Inference	male	19	disgust	4	m6	0	AU12	non-targeted	Emotion-Inference	sadness	0
1064481	Emotion-Inference	male	19	disgust	4	m6		AU4	targeted	Emotion-Inference	sadness	0
1064481	Emotion-Inference	male	19	disgust	4	m6	0	AU10	targeted	Emotion-Inference	sadness	0
1064481	Emotion-Inference	male	19	fear	4	f3	0	AU2	non-targeted	Emotion-Inference	fear	1
1064481	Emotion-Inference	male	19	fear	4	f3	0	AU10	non-targeted	Emotion-Inference	fear	1
1064481	Emotion-Inference	male	19	fear	4	f3	0	AU12	non-targeted	Emotion-Inference	fear	1
1064481	Emotion-Inference	male	19	fear	4	f3	0	AU4	targeted	Emotion-Inference	fear	1
1064481	Emotion-Inference	male	19	happiness	4	m6	0	AU2	non-targeted	Emotion-Inference	happiness	1
1064481	Emotion-Inference	male	19	happiness	4	m6	0	AU4	non-targeted	Emotion-Inference	happiness	1
1064481	Emotion-Inference	male	19	happiness	4	m6	0	AU10	non-targeted	Emotion-Inference	happiness	1
1064481	Emotion-Inference	male	19	happiness	4	m6	1	AU12	targeted	Emotion-Inference	happiness	1
1064481	Emotion-Inference	male	19	sadness	4	f16	0	AU2	non-targeted	Emotion-Inference	sadness	1
1064481	Emotion-Inference	male	19	sadness	4	f16	0	AU10	non-targeted	Emotion-Inference	sadness	1
1064481	Emotion-Inference	male	19	sadness	4	f16	0	AU12	non-targeted	Emotion-Inference	sadness	1
1064481	Emotion-Inference	male	19	sadness	4	f16	1	AU4	targeted	Emotion-Inference	sadness	1
1064481	Emotion-Inference	male	19	surprise	4	f3	0	AU4	non-targeted	Emotion-Inference	surprise	1
1064481	Emotion-Inference	male	19	surprise	4	f3	0	AU10	non-targeted	Emotion-Inference	surprise	1
1064481	Emotion-Inference	male	19	surprise	4	f3	0	AU12	non-targeted	Emotion-Inference	surprise	1
1064481	Emotion-Inference	male	19	surprise	4	f3	0	AU2	targeted	Emotion-Inference	surprise	1
1064565	Emotion-Inference	male	25	anger	1	m10	0	AU2	non-targeted	Emotion-Inference	anger	1
1064565	Emotion-Inference	male	25	anger	1	m10	0	AU10	non-targeted	Emotion-Inference	anger	1
1064565	Emotion-Inference	male	25	anger	1	m10	0	AU12	non-targeted	Emotion-Inference	anger	1
1064565	Emotion-Inference	male	25	anger	1	m10	0	AU4	targeted	Emotion-Inference	anger	1
1064565	Emotion-Inference	male	25	disgust	1	f13	0	AU2	non-targeted	Emotion-Inference	disgust	1
1064565	Emotion-Inference	male	25	disgust	1	f13	0	AU12	non-targeted	Emotion-Inference	disgust	1
1064565	Emotion-Inference	male	25	disgust	1	f13	0	AU4	targeted	Emotion-Inference	disgust	1
1064565	Emotion-Inference	male	25	disgust	1	f13	0	AU10	targeted	Emotion-Inference	disgust	1
1064565	Emotion-Inference	male	25	fear	1	m10	0	AU2	non-targeted	Emotion-Inference	surprise	0
1064565	Emotion-Inference	male	25	fear	1	m10	0	AU10	non-targeted	Emotion-Inference	surprise	0
1064565	Emotion-Inference	male	25	fear	1	m10	0	AU12	non-targeted	Emotion-Inference	surprise	0
1064565	Emotion-Inference	male	25	fear	1	m10	0	AU4	targeted	Emotion-Inference	surprise	0
1064565	Emotion-Inference	male	25	happiness	1	m1	0	AU2	non-targeted	Emotion-Inference	happiness	1
1064565	Emotion-Inference	male	25	happiness	1	m1	0	AU4	non-targeted	Emotion-Inference	happiness	1
1064565	Emotion-Inference	male	25	happiness	1	m1	0	AU10	non-targeted	Emotion-Inference	happiness	1
1064565	Emotion-Inference	male	25	happiness	1	m1	0	AU12	targeted	Emotion-Inference	happiness	1
1064565	Emotion-Inference	male	25	sadness	1	m1	0	AU2	non-targeted	Emotion-Inference	sadness	1
1064565	Emotion-Inference	male	25	sadness	1	m1	0	AU10	non-targeted	Emotion-Inference	sadness	1
1064565	Emotion-Inference	male	25	sadness	1	m1	0	AU12	non-targeted	Emotion-Inference	sadness	1
1064565	Emotion-Inference	male	25	sadness	1	m1	0	AU4	targeted	Emotion-Inference	sadness	1
1064565	Emotion-Inference	male	25	surprise	1	m10	0	AU4	non-targeted	Emotion-Inference	surprise	1
1064565	Emotion-Inference	male	25	surprise	1	m10	0	AU10	non-targeted	Emotion-Inference	surprise	1
1064565	Emotion-Inference	male	25	surprise	1	m10	0	AU12	non-targeted	Emotion-Inference	surprise	1
1064565	Emotion-Inference	male	25	surprise	1	m10	0	AU2	targeted	Emotion-Inference	surprise	1
1064565	Emotion-Inference	male	25	anger	2	f13	0	AU2	non-targeted	Emotion-Inference	anger	1
1064565	Emotion-Inference	male	25	anger	2	f13	0	AU10	non-targeted	Emotion-Inference	anger	1
1064565	Emotion-Inference	male	25	anger	2	f13	0	AU12	non-targeted	Emotion-Inference	anger	1
1064565	Emotion-Inference	male	25	anger	2	f13	1	AU4	targeted	Emotion-Inference	anger	1
1064565	Emotion-Inference	male	25	disgust	2	m1	0	AU2	non-targeted	Emotion-Inference	disgust	1
1064565	Emotion-Inference	male	25	disgust	2	m1	0	AU12	non-targeted	Emotion-Inference	disgust	1
1064565	Emotion-Inference	male	25	disgust	2	m1	0	AU4	targeted	Emotion-Inference	disgust	1
1064565	Emotion-Inference	male	25	disgust	2	m1	0	AU10	targeted	Emotion-Inference	disgust	1
1064565	Emotion-Inference	male	25	fear	2	f13	0	AU2	non-targeted	Emotion-Inference	disgust	0
1064565	Emotion-Inference	male	25	fear	2	f13	0	AU10	non-targeted	Emotion-Inference	disgust	0
1064565	Emotion-Inference	male	25	fear	2	f13	0	AU12	non-targeted	Emotion-Inference	disgust	0
1064565	Emotion-Inference	male	25	fear	2	f13	0	AU4	targeted	Emotion-Inference	disgust	0
1064565	Emotion-Inference	male	25	happiness	2	f10	0	AU2	non-targeted	Emotion-Inference	happiness	1
1064565	Emotion-Inference	male	25	happiness	2	f10	0	AU4	non-targeted	Emotion-Inference	happiness	1
1064565	Emotion-Inference	male	25	happiness	2	f10	0	AU10	non-targeted	Emotion-Inference	happiness	1
1064565	Emotion-Inference	male	25	happiness	2	f10	0	AU12	targeted	Emotion-Inference	happiness	1
1064565	Emotion-Inference	male	25	sadness	2	f10	0	AU2	non-targeted	Emotion-Inference	disgust	0
1064565	Emotion-Inference	male	25	sadness	2	f10	1	AU10	non-targeted	Emotion-Inference	disgust	0
1064565	Emotion-Inference	male	25	sadness	2	f10	0	AU12	non-targeted	Emotion-Inference	disgust	0
1064565	Emotion-Inference	male	25	sadness	2	f10	1	AU4	targeted	Emotion-Inference	disgust	0
1064565	Emotion-Inference	male	25	surprise	2	f10	0	AU4	non-targeted	Emotion-Inference	surprise	1
1064565	Emotion-Inference	male	25	surprise	2	f10	0	AU10	non-targeted	Emotion-Inference	surprise	1
1064565	Emotion-Inference	male	25	surprise	2	f10	0	AU12	non-targeted	Emotion-Inference	surprise	1
1064565	Emotion-Inference	male	25	surprise	2	f10	0	AU2	targeted	Emotion-Inference	surprise	1
1064565	Emotion-Inference	male	25	anger	3	m9	0	AU2	non-targeted	Emotion-Inference	anger	1
1064565	Emotion-Inference	male	25	anger	3	m9	0	AU10	non-targeted	Emotion-Inference	anger	1
1064565	Emotion-Inference	male	25	anger	3	m9	0	AU12	non-targeted	Emotion-Inference	anger	1
1064565	Emotion-Inference	male	25	anger	3	m9	0	AU4	targeted	Emotion-Inference	anger	1
1064565	Emotion-Inference	male	25	disgust	3	f3	0	AU2	non-targeted	Emotion-Inference	disgust	1
1064565	Emotion-Inference	male	25	disgust	3	f3	0	AU12	non-targeted	Emotion-Inference	disgust	1
1064565	Emotion-Inference	male	25	disgust	3	f3	0	AU4	targeted	Emotion-Inference	disgust	1
1064565	Emotion-Inference	male	25	disgust	3	f3	0	AU10	targeted	Emotion-Inference	disgust	1
1064565	Emotion-Inference	male	25	fear	3	m9	0	AU2	non-targeted	Emotion-Inference	fear	1
1064565	Emotion-Inference	male	25	fear	3	m9	0	AU10	non-targeted	Emotion-Inference	fear	1
1064565	Emotion-Inference	male	25	fear	3	m9	0	AU12	non-targeted	Emotion-Inference	fear	1
1064565	Emotion-Inference	male	25	fear	3	m9	0	AU4	targeted	Emotion-Inference	fear	1
1064565	Emotion-Inference	male	25	happiness	3	f16	0	AU2	non-targeted	Emotion-Inference	happiness	1
1064565	Emotion-Inference	male	25	happiness	3	f16	0	AU4	non-targeted	Emotion-Inference	happiness	1
1064565	Emotion-Inference	male	25	happiness	3	f16	0	AU10	non-targeted	Emotion-Inference	happiness	1
1064565	Emotion-Inference	male	25	happiness	3	f16	0	AU12	targeted	Emotion-Inference	happiness	1
1064565	Emotion-Inference	male	25	sadness	3	m9	0	AU2	non-targeted	Emotion-Inference	sadness	1
1064565	Emotion-Inference	male	25	sadness	3	m9	0	AU10	non-targeted	Emotion-Inference	sadness	1
1064565	Emotion-Inference	male	25	sadness	3	m9	0	AU12	non-targeted	Emotion-Inference	sadness	1
1064565	Emotion-Inference	male	25	sadness	3	m9	0	AU4	targeted	Emotion-Inference	sadness	1
1064565	Emotion-Inference	male	25	surprise	3	m9	0	AU4	non-targeted	Emotion-Inference	surprise	1
1064565	Emotion-Inference	male	25	surprise	3	m9	0	AU10	non-targeted	Emotion-Inference	surprise	1
1064565	Emotion-Inference	male	25	surprise	3	m9	0	AU12	non-targeted	Emotion-Inference	surprise	1
1064565	Emotion-Inference	male	25	surprise	3	m9	0	AU2	targeted	Emotion-Inference	surprise	1
1064565	Emotion-Inference	male	25	anger	4	f3	0	AU2	non-targeted	Emotion-Inference	anger	1
1064565	Emotion-Inference	male	25	anger	4	f3	0	AU10	non-targeted	Emotion-Inference	anger	1
1064565	Emotion-Inference	male	25	anger	4	f3	0	AU12	non-targeted	Emotion-Inference	anger	1
1064565	Emotion-Inference	male	25	anger	4	f3	0	AU4	targeted	Emotion-Inference	anger	1
1064565	Emotion-Inference	male	25	disgust	4	m6	0	AU2	non-targeted	Emotion-Inference	disgust	1
1064565	Emotion-Inference	male	25	disgust	4	m6	0	AU12	non-targeted	Emotion-Inference	disgust	1
1064565	Emotion-Inference	male	25	disgust	4	m6	0	AU4	targeted	Emotion-Inference	disgust	1
1064565	Emotion-Inference	male	25	disgust	4	m6	0	AU10	targeted	Emotion-Inference	disgust	1
1064565	Emotion-Inference	male	25	fear	4	f3	0	AU2	non-targeted	Emotion-Inference	fear	1
1064565	Emotion-Inference	male	25	fear	4	f3	0	AU10	non-targeted	Emotion-Inference	fear	1
1064565	Emotion-Inference	male	25	fear	4	f3	0	AU12	non-targeted	Emotion-Inference	fear	1
1064565	Emotion-Inference	male	25	fear	4	f3	0	AU4	targeted	Emotion-Inference	fear	1
1064565	Emotion-Inference	male	25	happiness	4	m6	0	AU2	non-targeted	Emotion-Inference	happiness	1
1064565	Emotion-Inference	male	25	happiness	4	m6	0	AU4	non-targeted	Emotion-Inference	happiness	1
1064565	Emotion-Inference	male	25	happiness	4	m6	0	AU10	non-targeted	Emotion-Inference	happiness	1
1064565	Emotion-Inference	male	25	happiness	4	m6	0	AU12	targeted	Emotion-Inference	happiness	1
1064565	Emotion-Inference	male	25	sadness	4	f16	0	AU2	non-targeted	Emotion-Inference	disgust	0
1064565	Emotion-Inference	male	25	sadness	4	f16	0	AU10	non-targeted	Emotion-Inference	disgust	0
1064565	Emotion-Inference	male	25	sadness	4	f16	0	AU12	non-targeted	Emotion-Inference	disgust	0
1064565	Emotion-Inference	male	25	sadness	4	f16	0	AU4	targeted	Emotion-Inference	disgust	0
1064565	Emotion-Inference	male	25	surprise	4	f3	0	AU4	non-targeted	Emotion-Inference	surprise	1
1064565	Emotion-Inference	male	25	surprise	4	f3	0	AU10	non-targeted	Emotion-Inference	surprise	1
1064565	Emotion-Inference	male	25	surprise	4	f3	0	AU12	non-targeted	Emotion-Inference	surprise	1
1064565	Emotion-Inference	male	25	surprise	4	f3	0	AU2	targeted	Emotion-Inference	surprise	1
1064667	Emotion-Inference	female	19	anger	1	m10	0	AU2	non-targeted	Emotion-Inference	disgust	0
1064667	Emotion-Inference	female	19	anger	1	m10	0	AU10	non-targeted	Emotion-Inference	disgust	0
1064667	Emotion-Inference	female	19	anger	1	m10	0	AU12	non-targeted	Emotion-Inference	disgust	0
1064667	Emotion-Inference	female	19	anger	1	m10	0	AU4	targeted	Emotion-Inference	disgust	0
1064667	Emotion-Inference	female	19	disgust	1	f13	0	AU2	non-targeted	Emotion-Inference	sadness	0
1064667	Emotion-Inference	female	19	disgust	1	f13	0	AU12	non-targeted	Emotion-Inference	sadness	0
1064667	Emotion-Inference	female	19	disgust	1	f13	0	AU4	targeted	Emotion-Inference	sadness	0
1064667	Emotion-Inference	female	19	disgust	1	f13	0	AU10	targeted	Emotion-Inference	sadness	0
1064667	Emotion-Inference	female	19	fear	1	m10	0	AU2	non-targeted	Emotion-Inference	surprise	0
1064667	Emotion-Inference	female	19	fear	1	m10	0	AU10	non-targeted	Emotion-Inference	surprise	0
1064667	Emotion-Inference	female	19	fear	1	m10	0	AU12	non-targeted	Emotion-Inference	surprise	0
1064667	Emotion-Inference	female	19	fear	1	m10	0	AU4	targeted	Emotion-Inference	surprise	0
1064667	Emotion-Inference	female	19	happiness	1	m1	0	AU2	non-targeted	Emotion-Inference	happiness	1
1064667	Emotion-Inference	female	19	happiness	1	m1	0	AU4	non-targeted	Emotion-Inference	happiness	1
1064667	Emotion-Inference	female	19	happiness	1	m1	0	AU10	non-targeted	Emotion-Inference	happiness	1
1064667	Emotion-Inference	female	19	happiness	1	m1	0	AU12	targeted	Emotion-Inference	happiness	1
1064667	Emotion-Inference	female	19	sadness	1	m1	0	AU2	non-targeted	Emotion-Inference	sadness	1
1064667	Emotion-Inference	female	19	sadness	1	m1	0	AU10	non-targeted	Emotion-Inference	sadness	1
1064667	Emotion-Inference	female	19	sadness	1	m1	0	AU12	non-targeted	Emotion-Inference	sadness	1
1064667	Emotion-Inference	female	19	sadness	1	m1	0	AU4	targeted	Emotion-Inference	sadness	1
1064667	Emotion-Inference	female	19	surprise	1	m10	0	AU4	non-targeted	Emotion-Inference	surprise	1
1064667	Emotion-Inference	female	19	surprise	1	m10	0	AU10	non-targeted	Emotion-Inference	surprise	1
1064667	Emotion-Inference	female	19	surprise	1	m10	0	AU12	non-targeted	Emotion-Inference	surprise	1
1064667	Emotion-Inference	female	19	surprise	1	m10	0	AU2	targeted	Emotion-Inference	surprise	1
1064667	Emotion-Inference	female	19	anger	2	f13	0	AU2	non-targeted	Emotion-Inference	anger	1
1064667	Emotion-Inference	female	19	anger	2	f13	0	AU10	non-targeted	Emotion-Inference	anger	1
1064667	Emotion-Inference	female	19	anger	2	f13	0	AU12	non-targeted	Emotion-Inference	anger	1
1064667	Emotion-Inference	female	19	anger	2	f13	0	AU4	targeted	Emotion-Inference	anger	1
1064667	Emotion-Inference	female	19	disgust	2	m1	0	AU2	non-targeted	Emotion-Inference	disgust	1
1064667	Emotion-Inference	female	19	disgust	2	m1	0	AU12	non-targeted	Emotion-Inference	disgust	1
1064667	Emotion-Inference	female	19	disgust	2	m1	0	AU4	targeted	Emotion-Inference	disgust	1
1064667	Emotion-Inference	female	19	disgust	2	m1	0	AU10	targeted	Emotion-Inference	disgust	1
1064667	Emotion-Inference	female	19	fear	2	f13	0	AU2	non-targeted	Emotion-Inference	fear	1
1064667	Emotion-Inference	female	19	fear	2	f13	0	AU10	non-targeted	Emotion-Inference	fear	1
1064667	Emotion-Inference	female	19	fear	2	f13	0	AU12	non-targeted	Emotion-Inference	fear	1
1064667	Emotion-Inference	female	19	fear	2	f13	0	AU4	targeted	Emotion-Inference	fear	1
1064667	Emotion-Inference	female	19	happiness	2	f10	0	AU2	non-targeted	Emotion-Inference	happiness	1
1064667	Emotion-Inference	female	19	happiness	2	f10	0	AU4	non-targeted	Emotion-Inference	happiness	1
1064667	Emotion-Inference	female	19	happiness	2	f10	0	AU10	non-targeted	Emotion-Inference	happiness	1
1064667	Emotion-Inference	female	19	happiness	2	f10	0	AU12	targeted	Emotion-Inference	happiness	1
1064667	Emotion-Inference	female	19	sadness	2	f10	0	AU2	non-targeted	Emotion-Inference	sadness	1
1064667	Emotion-Inference	female	19	sadness	2	f10	0	AU10	non-targeted	Emotion-Inference	sadness	1
1064667	Emotion-Inference	female	19	sadness	2	f10	0	AU12	non-targeted	Emotion-Inference	sadness	1
1064667	Emotion-Inference	female	19	sadness	2	f10	0	AU4	targeted	Emotion-Inference	sadness	1
1064667	Emotion-Inference	female	19	surprise	2	f10	0	AU4	non-targeted	Emotion-Inference	surprise	1
1064667	Emotion-Inference	female	19	surprise	2	f10	0	AU10	non-targeted	Emotion-Inference	surprise	1
1064667	Emotion-Inference	female	19	surprise	2	f10	0	AU12	non-targeted	Emotion-Inference	surprise	1
1064667	Emotion-Inference	female	19	surprise	2	f10	0	AU2	targeted	Emotion-Inference	surprise	1
1064667	Emotion-Inference	female	19	anger	3	m9	0	AU2	non-targeted	Emotion-Inference	anger	1
1064667	Emotion-Inference	female	19	anger	3	m9	0	AU10	non-targeted	Emotion-Inference	anger	1
1064667	Emotion-Inference	female	19	anger	3	m9	0	AU12	non-targeted	Emotion-Inference	anger	1
1064667	Emotion-Inference	female	19	anger	3	m9	0	AU4	targeted	Emotion-Inference	anger	1
1064667	Emotion-Inference	female	19	disgust	3	f3	0	AU2	non-targeted	Emotion-Inference	disgust	1
1064667	Emotion-Inference	female	19	disgust	3	f3	0	AU12	non-targeted	Emotion-Inference	disgust	1
1064667	Emotion-Inference	female	19	disgust	3	f3	0	AU4	targeted	Emotion-Inference	disgust	1
1064667	Emotion-Inference	female	19	disgust	3	f3	0	AU10	targeted	Emotion-Inference	disgust	1
1064667	Emotion-Inference	female	19	fear	3	m9	0	AU2	non-targeted	Emotion-Inference	fear	1
1064667	Emotion-Inference	female	19	fear	3	m9	0	AU10	non-targeted	Emotion-Inference	fear	1
1064667	Emotion-Inference	female	19	fear	3	m9	0	AU12	non-targeted	Emotion-Inference	fear	1
1064667	Emotion-Inference	female	19	fear	3	m9	0	AU4	targeted	Emotion-Inference	fear	1
1064667	Emotion-Inference	female	19	happiness	3	f16	0	AU2	non-targeted	Emotion-Inference	happiness	1
1064667	Emotion-Inference	female	19	happiness	3	f16	0	AU4	non-targeted	Emotion-Inference	happiness	1
1064667	Emotion-Inference	female	19	happiness	3	f16	0	AU10	non-targeted	Emotion-Inference	happiness	1
1064667	Emotion-Inference	female	19	happiness	3	f16	1	AU12	targeted	Emotion-Inference	happiness	1
1064667	Emotion-Inference	female	19	sadness	3	m9	0	AU2	non-targeted	Emotion-Inference	sadness	1
1064667	Emotion-Inference	female	19	sadness	3	m9	0	AU10	non-targeted	Emotion-Inference	sadness	1
1064667	Emotion-Inference	female	19	sadness	3	m9	0	AU12	non-targeted	Emotion-Inference	sadness	1
1064667	Emotion-Inference	female	19	sadness	3	m9	0	AU4	targeted	Emotion-Inference	sadness	1
1064667	Emotion-Inference	female	19	surprise	3	m9	0	AU4	non-targeted	Emotion-Inference	surprise	1
1064667	Emotion-Inference	female	19	surprise	3	m9	0	AU10	non-targeted	Emotion-Inference	surprise	1
1064667	Emotion-Inference	female	19	surprise	3	m9	0	AU12	non-targeted	Emotion-Inference	surprise	1
1064667	Emotion-Inference	female	19	surprise	3	m9	0	AU2	targeted	Emotion-Inference	surprise	1
1064667	Emotion-Inference	female	19	anger	4	f3	0	AU2	non-targeted	Emotion-Inference	anger	1
1064667	Emotion-Inference	female	19	anger	4	f3	0	AU10	non-targeted	Emotion-Inference	anger	1
1064667	Emotion-Inference	female	19	anger	4	f3	0	AU12	non-targeted	Emotion-Inference	anger	1
1064667	Emotion-Inference	female	19	anger	4	f3	0	AU4	targeted	Emotion-Inference	anger	1
1064667	Emotion-Inference	female	19	disgust	4	m6	0	AU2	non-targeted	Emotion-Inference	sadness	0
1064667	Emotion-Inference	female	19	disgust	4	m6	0	AU12	non-targeted	Emotion-Inference	sadness	0
1064667	Emotion-Inference	female	19	disgust	4	m6	0	AU4	targeted	Emotion-Inference	sadness	0
1064667	Emotion-Inference	female	19	disgust	4	m6	0	AU10	targeted	Emotion-Inference	sadness	0
1064667	Emotion-Inference	female	19	fear	4	f3	1	AU2	non-targeted	Emotion-Inference	fear	1
1064667	Emotion-Inference	female	19	fear	4	f3	0	AU10	non-targeted	Emotion-Inference	fear	1
1064667	Emotion-Inference	female	19	fear	4	f3	0	AU12	non-targeted	Emotion-Inference	fear	1
1064667	Emotion-Inference	female	19	fear	4	f3	0	AU4	targeted	Emotion-Inference	fear	1
1064667	Emotion-Inference	female	19	happiness	4	m6	0	AU2	non-targeted	Emotion-Inference	happiness	1
1064667	Emotion-Inference	female	19	happiness	4	m6	0	AU4	non-targeted	Emotion-Inference	happiness	1
1064667	Emotion-Inference	female	19	happiness	4	m6	0	AU10	non-targeted	Emotion-Inference	happiness	1
1064667	Emotion-Inference	female	19	happiness	4	m6	0	AU12	targeted	Emotion-Inference	happiness	1
1064667	Emotion-Inference	female	19	sadness	4	f16	0	AU2	non-targeted	Emotion-Inference	sadness	1
1064667	Emotion-Inference	female	19	sadness	4	f16	0	AU10	non-targeted	Emotion-Inference	sadness	1
1064667	Emotion-Inference	female	19	sadness	4	f16	0	AU12	non-targeted	Emotion-Inference	sadness	1
1064667	Emotion-Inference	female	19	sadness	4	f16	0	AU4	targeted	Emotion-Inference	sadness	1
1064667	Emotion-Inference	female	19	surprise	4	f3	0	AU4	non-targeted	Emotion-Inference	surprise	1
1064667	Emotion-Inference	female	19	surprise	4	f3	0	AU10	non-targeted	Emotion-Inference	surprise	1
1064667	Emotion-Inference	female	19	surprise	4	f3	0	AU12	non-targeted	Emotion-Inference	surprise	1
1064667	Emotion-Inference	female	19	surprise	4	f3	0	AU2	targeted	Emotion-Inference	surprise	1
1064728	Emotion-Inference	male	20	anger	1	f3	0	AU2	non-targeted	Emotion-Inference	anger	1
1064728	Emotion-Inference	male	20	anger	1	f3	0	AU10	non-targeted	Emotion-Inference	anger	1
1064728	Emotion-Inference	male	20	anger	1	f3	0	AU12	non-targeted	Emotion-Inference	anger	1
1064728	Emotion-Inference	male	20	anger	1	f3	0	AU4	targeted	Emotion-Inference	anger	1
1064728	Emotion-Inference	male	20	disgust	1	m6	0	AU2	non-targeted	Emotion-Inference	sadness	0
1064728	Emotion-Inference	male	20	disgust	1	m6	0	AU12	non-targeted	Emotion-Inference	sadness	0
1064728	Emotion-Inference	male	20	disgust	1	m6	0	AU4	targeted	Emotion-Inference	sadness	0
1064728	Emotion-Inference	male	20	disgust	1	m6	0	AU10	targeted	Emotion-Inference	sadness	0
1064728	Emotion-Inference	male	20	fear	1	f3	0	AU2	non-targeted	Emotion-Inference	fear	1
1064728	Emotion-Inference	male	20	fear	1	f3	0	AU10	non-targeted	Emotion-Inference	fear	1
1064728	Emotion-Inference	male	20	fear	1	f3	0	AU12	non-targeted	Emotion-Inference	fear	1
1064728	Emotion-Inference	male	20	fear	1	f3	0	AU4	targeted	Emotion-Inference	fear	1
1064728	Emotion-Inference	male	20	happiness	1	m6	0	AU2	non-targeted	Emotion-Inference	happiness	1
1064728	Emotion-Inference	male	20	happiness	1	m6	0	AU4	non-targeted	Emotion-Inference	happiness	1
1064728	Emotion-Inference	male	20	happiness	1	m6	0	AU10	non-targeted	Emotion-Inference	happiness	1
1064728	Emotion-Inference	male	20	happiness	1	m6	0	AU12	targeted	Emotion-Inference	happiness	1
1064728	Emotion-Inference	male	20	sadness	1	f16	0	AU2	non-targeted	Emotion-Inference	disgust	0
1064728	Emotion-Inference	male	20	sadness	1	f16	0	AU10	non-targeted	Emotion-Inference	disgust	0
1064728	Emotion-Inference	male	20	sadness	1	f16	0	AU12	non-targeted	Emotion-Inference	disgust	0
1064728	Emotion-Inference	male	20	sadness	1	f16	0	AU4	targeted	Emotion-Inference	disgust	0
1064728	Emotion-Inference	male	20	surprise	1	f3	0	AU4	non-targeted	Emotion-Inference	surprise	1
1064728	Emotion-Inference	male	20	surprise	1	f3	0	AU10	non-targeted	Emotion-Inference	surprise	1
1064728	Emotion-Inference	male	20	surprise	1	f3	0	AU12	non-targeted	Emotion-Inference	surprise	1
1064728	Emotion-Inference	male	20	surprise	1	f3	0	AU2	targeted	Emotion-Inference	surprise	1
1064728	Emotion-Inference	male	20	anger	2	m9	0	AU2	non-targeted	Emotion-Inference	surprise	0
1064728	Emotion-Inference	male	20	anger	2	m9	0	AU10	non-targeted	Emotion-Inference	surprise	0
1064728	Emotion-Inference	male	20	anger	2	m9	0	AU12	non-targeted	Emotion-Inference	surprise	0
1064728	Emotion-Inference	male	20	anger	2	m9	0	AU4	targeted	Emotion-Inference	surprise	0
1064728	Emotion-Inference	male	20	disgust	2	f3	0	AU2	non-targeted	Emotion-Inference	disgust	1
1064728	Emotion-Inference	male	20	disgust	2	f3	0	AU12	non-targeted	Emotion-Inference	disgust	1
1064728	Emotion-Inference	male	20	disgust	2	f3	0	AU4	targeted	Emotion-Inference	disgust	1
1064728	Emotion-Inference	male	20	disgust	2	f3	0	AU10	targeted	Emotion-Inference	disgust	1
1064728	Emotion-Inference	male	20	fear	2	m9	0	AU2	non-targeted	Emotion-Inference	disgust	0
1064728	Emotion-Inference	male	20	fear	2	m9	0	AU10	non-targeted	Emotion-Inference	disgust	0
1064728	Emotion-Inference	male	20	fear	2	m9	0	AU12	non-targeted	Emotion-Inference	disgust	0
1064728	Emotion-Inference	male	20	fear	2	m9	0	AU4	targeted	Emotion-Inference	disgust	0
1064728	Emotion-Inference	male	20	happiness	2	f16	0	AU2	non-targeted	Emotion-Inference	happiness	1
1064728	Emotion-Inference	male	20	happiness	2	f16	0	AU4	non-targeted	Emotion-Inference	happiness	1
1064728	Emotion-Inference	male	20	happiness	2	f16	0	AU10	non-targeted	Emotion-Inference	happiness	1
1064728	Emotion-Inference	male	20	happiness	2	f16	0	AU12	targeted	Emotion-Inference	happiness	1
1064728	Emotion-Inference	male	20	sadness	2	m9	0	AU2	non-targeted	Emotion-Inference	sadness	1
1064728	Emotion-Inference	male	20	sadness	2	m9	0	AU10	non-targeted	Emotion-Inference	sadness	1
1064728	Emotion-Inference	male	20	sadness	2	m9	0	AU12	non-targeted	Emotion-Inference	sadness	1
1064728	Emotion-Inference	male	20	sadness	2	m9	0	AU4	targeted	Emotion-Inference	sadness	1
1064728	Emotion-Inference	male	20	surprise	2	m9	0	AU4	non-targeted	Emotion-Inference	surprise	1
1064728	Emotion-Inference	male	20	surprise	2	m9	0	AU10	non-targeted	Emotion-Inference	surprise	1
1064728	Emotion-Inference	male	20	surprise	2	m9	0	AU12	non-targeted	Emotion-Inference	surprise	1
1064728	Emotion-Inference	male	20	surprise	2	m9	0	AU2	targeted	Emotion-Inference	surprise	1
1064728	Emotion-Inference	male	20	anger	3	f13	0	AU2	non-targeted	Emotion-Inference	anger	1
1064728	Emotion-Inference	male	20	anger	3	f13	0	AU10	non-targeted	Emotion-Inference	anger	1
1064728	Emotion-Inference	male	20	anger	3	f13	0	AU12	non-targeted	Emotion-Inference	anger	1
1064728	Emotion-Inference	male	20	anger	3	f13	0	AU4	targeted	Emotion-Inference	anger	1
1064728	Emotion-Inference	male	20	disgust	3	m1	0	AU2	non-targeted	Emotion-Inference	disgust	1
1064728	Emotion-Inference	male	20	disgust	3	m1	0	AU12	non-targeted	Emotion-Inference	disgust	1
1064728	Emotion-Inference	male	20	disgust	3	m1	0	AU4	targeted	Emotion-Inference	disgust	1
1064728	Emotion-Inference	male	20	disgust	3	m1	0	AU10	targeted	Emotion-Inference	disgust	1
1064728	Emotion-Inference	male	20	fear	3	f13	0	AU2	non-targeted	Emotion-Inference	anger	0
1064728	Emotion-Inference	male	20	fear	3	f13	0	AU10	non-targeted	Emotion-Inference	anger	0
1064728	Emotion-Inference	male	20	fear	3	f13	0	AU12	non-targeted	Emotion-Inference	anger	0
1064728	Emotion-Inference	male	20	fear	3	f13	0	AU4	targeted	Emotion-Inference	anger	0
1064728	Emotion-Inference	male	20	happiness	3	f10	0	AU2	non-targeted	Emotion-Inference	happiness	1
1064728	Emotion-Inference	male	20	happiness	3	f10	0	AU4	non-targeted	Emotion-Inference	happiness	1
1064728	Emotion-Inference	male	20	happiness	3	f10	0	AU10	non-targeted	Emotion-Inference	happiness	1
1064728	Emotion-Inference	male	20	happiness	3	f10	0	AU12	targeted	Emotion-Inference	happiness	1
1064728	Emotion-Inference	male	20	sadness	3	f10	0	AU2	non-targeted	Emotion-Inference	disgust	0
1064728	Emotion-Inference	male	20	sadness	3	f10	0	AU10	non-targeted	Emotion-Inference	disgust	0
1064728	Emotion-Inference	male	20	sadness	3	f10	0	AU12	non-targeted	Emotion-Inference	disgust	0
1064728	Emotion-Inference	male	20	sadness	3	f10	0	AU4	targeted	Emotion-Inference	disgust	0
1064728	Emotion-Inference	male	20	surprise	3	f10	0	AU4	non-targeted	Emotion-Inference	surprise	1
1064728	Emotion-Inference	male	20	surprise	3	f10	0	AU10	non-targeted	Emotion-Inference	surprise	1
1064728	Emotion-Inference	male	20	surprise	3	f10	0	AU12	non-targeted	Emotion-Inference	surprise	1
1064728	Emotion-Inference	male	20	surprise	3	f10	0	AU2	targeted	Emotion-Inference	surprise	1
1064728	Emotion-Inference	male	20	anger	4	m10	0	AU2	non-targeted	Emotion-Inference	anger	1
1064728	Emotion-Inference	male	20	anger	4	m10	0	AU10	non-targeted	Emotion-Inference	anger	1
1064728	Emotion-Inference	male	20	anger	4	m10	0	AU12	non-targeted	Emotion-Inference	anger	1
1064728	Emotion-Inference	male	20	anger	4	m10	0	AU4	targeted	Emotion-Inference	anger	1
1064728	Emotion-Inference	male	20	disgust	4	f13	0	AU2	non-targeted	Emotion-Inference	disgust	1
1064728	Emotion-Inference	male	20	disgust	4	f13	0	AU12	non-targeted	Emotion-Inference	disgust	1
1064728	Emotion-Inference	male	20	disgust	4	f13	0	AU4	targeted	Emotion-Inference	disgust	1
1064728	Emotion-Inference	male	20	disgust	4	f13	0	AU10	targeted	Emotion-Inference	disgust	1
1064728	Emotion-Inference	male	20	fear	4	m10	0	AU2	non-targeted	Emotion-Inference	surprise	0
1064728	Emotion-Inference	male	20	fear	4	m10	0	AU10	non-targeted	Emotion-Inference	surprise	0
1064728	Emotion-Inference	male	20	fear	4	m10	0	AU12	non-targeted	Emotion-Inference	surprise	0
1064728	Emotion-Inference	male	20	fear	4	m10	0	AU4	targeted	Emotion-Inference	surprise	0
1064728	Emotion-Inference	male	20	happiness	4	m1	0	AU2	non-targeted	Emotion-Inference	happiness	1
1064728	Emotion-Inference	male	20	happiness	4	m1	0	AU4	non-targeted	Emotion-Inference	happiness	1
1064728	Emotion-Inference	male	20	happiness	4	m1	0	AU10	non-targeted	Emotion-Inference	happiness	1
1064728	Emotion-Inference	male	20	happiness	4	m1	0	AU12	targeted	Emotion-Inference	happiness	1
1064728	Emotion-Inference	male	20	sadness	4	m1	0	AU2	non-targeted	Emotion-Inference	disgust	0
1064728	Emotion-Inference	male	20	sadness	4	m1	0	AU10	non-targeted	Emotion-Inference	disgust	0
1064728	Emotion-Inference	male	20	sadness	4	m1	0	AU12	non-targeted	Emotion-Inference	disgust	0
1064728	Emotion-Inference	male	20	sadness	4	m1	0	AU4	targeted	Emotion-Inference	disgust	0
1064728	Emotion-Inference	male	20	surprise	4	m10	0	AU4	non-targeted	Emotion-Inference	surprise	1
1064728	Emotion-Inference	male	20	surprise	4	m10	0	AU10	non-targeted	Emotion-Inference	surprise	1
1064728	Emotion-Inference	male	20	surprise	4	m10	0	AU12	non-targeted	Emotion-Inference	surprise	1
1064728	Emotion-Inference	male	20	surprise	4	m10	0	AU2	targeted	Emotion-Inference	surprise	1
1064737	Emotion-Inference	female	18	anger	1	f3	0	AU2	non-targeted	Emotion-Inference	anger	1
1064737	Emotion-Inference	female	18	anger	1	f3	0	AU10	non-targeted	Emotion-Inference	anger	1
1064737	Emotion-Inference	female	18	anger	1	f3	0	AU12	non-targeted	Emotion-Inference	anger	1
1064737	Emotion-Inference	female	18	anger	1	f3	0	AU4	targeted	Emotion-Inference	anger	1
1064737	Emotion-Inference	female	18	disgust	1	m6	0	AU2	non-targeted	Emotion-Inference	disgust	1
1064737	Emotion-Inference	female	18	disgust	1	m6	0	AU12	non-targeted	Emotion-Inference	disgust	1
1064737	Emotion-Inference	female	18	disgust	1	m6	0	AU4	targeted	Emotion-Inference	disgust	1
1064737	Emotion-Inference	female	18	disgust	1	m6	0	AU10	targeted	Emotion-Inference	disgust	1
1064737	Emotion-Inference	female	18	fear	1	f3	0	AU2	non-targeted	Emotion-Inference	fear	1
1064737	Emotion-Inference	female	18	fear	1	f3	0	AU10	non-targeted	Emotion-Inference	fear	1
1064737	Emotion-Inference	female	18	fear	1	f3	0	AU12	non-targeted	Emotion-Inference	fear	1
1064737	Emotion-Inference	female	18	fear	1	f3	0	AU4	targeted	Emotion-Inference	fear	1
1064737	Emotion-Inference	female	18	happiness	1	m6	0	AU2	non-targeted	Emotion-Inference	happiness	1
1064737	Emotion-Inference	female	18	happiness	1	m6	0	AU4	non-targeted	Emotion-Inference	happiness	1
1064737	Emotion-Inference	female	18	happiness	1	m6	0	AU10	non-targeted	Emotion-Inference	happiness	1
1064737	Emotion-Inference	female	18	happiness	1	m6	0	AU12	targeted	Emotion-Inference	happiness	1
1064737	Emotion-Inference	female	18	sadness	1	f16	0	AU2	non-targeted	Emotion-Inference	sadness	1
1064737	Emotion-Inference	female	18	sadness	1	f16	0	AU10	non-targeted	Emotion-Inference	sadness	1
1064737	Emotion-Inference	female	18	sadness	1	f16	0	AU12	non-targeted	Emotion-Inference	sadness	1
1064737	Emotion-Inference	female	18	sadness	1	f16	0	AU4	targeted	Emotion-Inference	sadness	1
1064737	Emotion-Inference	female	18	surprise	1	f3	0	AU4	non-targeted	Emotion-Inference	surprise	1
1064737	Emotion-Inference	female	18	surprise	1	f3	0	AU10	non-targeted	Emotion-Inference	surprise	1
1064737	Emotion-Inference	female	18	surprise	1	f3	0	AU12	non-targeted	Emotion-Inference	surprise	1
1064737	Emotion-Inference	female	18	surprise	1	f3	1	AU2	targeted	Emotion-Inference	surprise	1
1064737	Emotion-Inference	female	18	anger	2	m9	0	AU2	non-targeted	Emotion-Inference	anger	1
1064737	Emotion-Inference	female	18	anger	2	m9	0	AU10	non-targeted	Emotion-Inference	anger	1
1064737	Emotion-Inference	female	18	anger	2	m9	0	AU12	non-targeted	Emotion-Inference	anger	1
1064737	Emotion-Inference	female	18	anger	2	m9	0	AU4	targeted	Emotion-Inference	anger	1
1064737	Emotion-Inference	female	18	disgust	2	f3	0	AU2	non-targeted	Emotion-Inference	disgust	1
1064737	Emotion-Inference	female	18	disgust	2	f3	0	AU12	non-targeted	Emotion-Inference	disgust	1
1064737	Emotion-Inference	female	18	disgust	2	f3	0	AU4	targeted	Emotion-Inference	disgust	1
1064737	Emotion-Inference	female	18	disgust	2	f3	0	AU10	targeted	Emotion-Inference	disgust	1
1064737	Emotion-Inference	female	18	fear	2	m9	0	AU2	non-targeted	Emotion-Inference	fear	1
1064737	Emotion-Inference	female	18	fear	2	m9	0	AU10	non-targeted	Emotion-Inference	fear	1
1064737	Emotion-Inference	female	18	fear	2	m9	0	AU12	non-targeted	Emotion-Inference	fear	1
1064737	Emotion-Inference	female	18	fear	2	m9	0	AU4	targeted	Emotion-Inference	fear	1
1064737	Emotion-Inference	female	18	happiness	2	f16	0	AU2	non-targeted	Emotion-Inference	happiness	1
1064737	Emotion-Inference	female	18	happiness	2	f16	0	AU4	non-targeted	Emotion-Inference	happiness	1
1064737	Emotion-Inference	female	18	happiness	2	f16	0	AU10	non-targeted	Emotion-Inference	happiness	1
1064737	Emotion-Inference	female	18	happiness	2	f16	0	AU12	targeted	Emotion-Inference	happiness	1
1064737	Emotion-Inference	female	18	sadness	2	m9	0	AU2	non-targeted	Emotion-Inference	disgust	0
1064737	Emotion-Inference	female	18	sadness	2	m9	0	AU10	non-targeted	Emotion-Inference	disgust	0
1064737	Emotion-Inference	female	18	sadness	2	m9	0	AU12	non-targeted	Emotion-Inference	disgust	0
1064737	Emotion-Inference	female	18	sadness	2	m9	0	AU4	targeted	Emotion-Inference	disgust	0
1064737	Emotion-Inference	female	18	surprise	2	m9	0	AU4	non-targeted	Emotion-Inference	surprise	1
1064737	Emotion-Inference	female	18	surprise	2	m9	0	AU10	non-targeted	Emotion-Inference	surprise	1
1064737	Emotion-Inference	female	18	surprise	2	m9	0	AU12	non-targeted	Emotion-Inference	surprise	1
1064737	Emotion-Inference	female	18	surprise	2	m9	0	AU2	targeted	Emotion-Inference	surprise	1
1064737	Emotion-Inference	female	18	anger	3	f13	0	AU2	non-targeted	Emotion-Inference	anger	1
1064737	Emotion-Inference	female	18	anger	3	f13	0	AU10	non-targeted	Emotion-Inference	anger	1
1064737	Emotion-Inference	female	18	anger	3	f13	0	AU12	non-targeted	Emotion-Inference	anger	1
1064737	Emotion-Inference	female	18	anger	3	f13	0	AU4	targeted	Emotion-Inference	anger	1
1064737	Emotion-Inference	female	18	disgust	3	m1	0	AU2	non-targeted	Emotion-Inference	disgust	1
1064737	Emotion-Inference	female	18	disgust	3	m1	0	AU12	non-targeted	Emotion-Inference	disgust	1
1064737	Emotion-Inference	female	18	disgust	3	m1	0	AU4	targeted	Emotion-Inference	disgust	1
1064737	Emotion-Inference	female	18	disgust	3	m1	0	AU10	targeted	Emotion-Inference	disgust	1
1064737	Emotion-Inference	female	18	fear	3	f13	0	AU2	non-targeted	Emotion-Inference	fear	1
1064737	Emotion-Inference	female	18	fear	3	f13	0	AU10	non-targeted	Emotion-Inference	fear	1
1064737	Emotion-Inference	female	18	fear	3	f13	0	AU12	non-targeted	Emotion-Inference	fear	1
1064737	Emotion-Inference	female	18	fear	3	f13	0	AU4	targeted	Emotion-Inference	fear	1
1064737	Emotion-Inference	female	18	happiness	3	f10	0	AU2	non-targeted	Emotion-Inference	happiness	1
1064737	Emotion-Inference	female	18	happiness	3	f10	0	AU4	non-targeted	Emotion-Inference	happiness	1
1064737	Emotion-Inference	female	18	happiness	3	f10	0	AU10	non-targeted	Emotion-Inference	happiness	1
1064737	Emotion-Inference	female	18	happiness	3	f10	0	AU12	targeted	Emotion-Inference	happiness	1
1064737	Emotion-Inference	female	18	sadness	3	f10	0	AU2	non-targeted	Emotion-Inference	sadness	1
1064737	Emotion-Inference	female	18	sadness	3	f10	0	AU10	non-targeted	Emotion-Inference	sadness	1
1064737	Emotion-Inference	female	18	sadness	3	f10	0	AU12	non-targeted	Emotion-Inference	sadness	1
1064737	Emotion-Inference	female	18	sadness	3	f10	0	AU4	targeted	Emotion-Inference	sadness	1
1064737	Emotion-Inference	female	18	surprise	3	f10	0	AU4	non-targeted	Emotion-Inference	surprise	1
1064737	Emotion-Inference	female	18	surprise	3	f10	0	AU10	non-targeted	Emotion-Inference	surprise	1
1064737	Emotion-Inference	female	18	surprise	3	f10	0	AU12	non-targeted	Emotion-Inference	surprise	1
1064737	Emotion-Inference	female	18	surprise	3	f10	0	AU2	targeted	Emotion-Inference	surprise	1
1064737	Emotion-Inference	female	18	anger	4	m10	0	AU2	non-targeted	Emotion-Inference	anger	1
1064737	Emotion-Inference	female	18	anger	4	m10	0	AU10	non-targeted	Emotion-Inference	anger	1
1064737	Emotion-Inference	female	18	anger	4	m10	0	AU12	non-targeted	Emotion-Inference	anger	1
1064737	Emotion-Inference	female	18	anger	4	m10	0	AU4	targeted	Emotion-Inference	anger	1
1064737	Emotion-Inference	female	18	disgust	4	f13	0	AU2	non-targeted	Emotion-Inference	disgust	1
1064737	Emotion-Inference	female	18	disgust	4	f13	0	AU12	non-targeted	Emotion-Inference	disgust	1
1064737	Emotion-Inference	female	18	disgust	4	f13	0	AU4	targeted	Emotion-Inference	disgust	1
1064737	Emotion-Inference	female	18	disgust	4	f13	0	AU10	targeted	Emotion-Inference	disgust	1
1064737	Emotion-Inference	female	18	fear	4	m10	0	AU2	non-targeted	Emotion-Inference	surprise	0
1064737	Emotion-Inference	female	18	fear	4	m10	0	AU10	non-targeted	Emotion-Inference	surprise	0
1064737	Emotion-Inference	female	18	fear	4	m10	0	AU12	non-targeted	Emotion-Inference	surprise	0
1064737	Emotion-Inference	female	18	fear	4	m10	0	AU4	targeted	Emotion-Inference	surprise	0
1064737	Emotion-Inference	female	18	happiness	4	m1	0	AU2	non-targeted	Emotion-Inference	happiness	1
1064737	Emotion-Inference	female	18	happiness	4	m1	0	AU4	non-targeted	Emotion-Inference	happiness	1
1064737	Emotion-Inference	female	18	happiness	4	m1	0	AU10	non-targeted	Emotion-Inference	happiness	1
1064737	Emotion-Inference	female	18	happiness	4	m1	0	AU12	targeted	Emotion-Inference	happiness	1
1064737	Emotion-Inference	female	18	sadness	4	m1	0	AU2	non-targeted	Emotion-Inference	sadness	1
1064737	Emotion-Inference	female	18	sadness	4	m1	0	AU10	non-targeted	Emotion-Inference	sadness	1
1064737	Emotion-Inference	female	18	sadness	4	m1	0	AU12	non-targeted	Emotion-Inference	sadness	1
1064737	Emotion-Inference	female	18	sadness	4	m1	0	AU4	targeted	Emotion-Inference	sadness	1
1064737	Emotion-Inference	female	18	surprise	4	m10	0	AU4	non-targeted	Emotion-Inference	surprise	1
1064737	Emotion-Inference	female	18	surprise	4	m10	0	AU10	non-targeted	Emotion-Inference	surprise	1
1064737	Emotion-Inference	female	18	surprise	4	m10	0	AU12	non-targeted	Emotion-Inference	surprise	1
1064737	Emotion-Inference	female	18	surprise	4	m10	0	AU2	targeted	Emotion-Inference	surprise	1
1064774	Emotion-Inference	female	19	anger	1	f3		AU2	non-targeted	Emotion-Inference	disgust	0
1064774	Emotion-Inference	female	19	anger	1	f3	0	AU10	non-targeted	Emotion-Inference	disgust	0
1064774	Emotion-Inference	female	19	anger	1	f3	0	AU12	non-targeted	Emotion-Inference	disgust	0
1064774	Emotion-Inference	female	19	anger	1	f3		AU4	targeted	Emotion-Inference	disgust	0
1064774	Emotion-Inference	female	19	disgust	1	m6		AU2	non-targeted	Emotion-Inference	sadness	0
1064774	Emotion-Inference	female	19	disgust	1	m6	0	AU12	non-targeted	Emotion-Inference	sadness	0
1064774	Emotion-Inference	female	19	disgust	1	m6		AU4	targeted	Emotion-Inference	sadness	0
1064774	Emotion-Inference	female	19	disgust	1	m6	0	AU10	targeted	Emotion-Inference	sadness	0
1064774	Emotion-Inference	female	19	fear	1	f3		AU2	non-targeted	Emotion-Inference	fear	1
1064774	Emotion-Inference	female	19	fear	1	f3	0	AU10	non-targeted	Emotion-Inference	fear	1
1064774	Emotion-Inference	female	19	fear	1	f3	0	AU12	non-targeted	Emotion-Inference	fear	1
1064774	Emotion-Inference	female	19	fear	1	f3		AU4	targeted	Emotion-Inference	fear	1
1064774	Emotion-Inference	female	19	happiness	1	m6		AU2	non-targeted	Emotion-Inference	happiness	1
1064774	Emotion-Inference	female	19	happiness	1	m6	0	AU4	non-targeted	Emotion-Inference	happiness	1
1064774	Emotion-Inference	female	19	happiness	1	m6	0	AU10	non-targeted	Emotion-Inference	happiness	1
1064774	Emotion-Inference	female	19	happiness	1	m6	1	AU12	targeted	Emotion-Inference	happiness	1
1064774	Emotion-Inference	female	19	sadness	1	f16		AU2	non-targeted	Emotion-Inference	fear	0
1064774	Emotion-Inference	female	19	sadness	1	f16	0	AU10	non-targeted	Emotion-Inference	fear	0
1064774	Emotion-Inference	female	19	sadness	1	f16	0	AU12	non-targeted	Emotion-Inference	fear	0
1064774	Emotion-Inference	female	19	sadness	1	f16		AU4	targeted	Emotion-Inference	fear	0
1064774	Emotion-Inference	female	19	surprise	1	f3		AU4	non-targeted	Emotion-Inference	surprise	1
1064774	Emotion-Inference	female	19	surprise	1	f3	0	AU10	non-targeted	Emotion-Inference	surprise	1
1064774	Emotion-Inference	female	19	surprise	1	f3	0	AU12	non-targeted	Emotion-Inference	surprise	1
1064774	Emotion-Inference	female	19	surprise	1	f3		AU2	targeted	Emotion-Inference	surprise	1
1064774	Emotion-Inference	female	19	anger	2	m9	1	AU2	non-targeted	Emotion-Inference	anger	1
1064774	Emotion-Inference	female	19	anger	2	m9	0	AU10	non-targeted	Emotion-Inference	anger	1
1064774	Emotion-Inference	female	19	anger	2	m9	0	AU12	non-targeted	Emotion-Inference	anger	1
1064774	Emotion-Inference	female	19	anger	2	m9		AU4	targeted	Emotion-Inference	anger	1
1064774	Emotion-Inference	female	19	disgust	2	f3		AU2	non-targeted	Emotion-Inference	disgust	1
1064774	Emotion-Inference	female	19	disgust	2	f3	0	AU12	non-targeted	Emotion-Inference	disgust	1
1064774	Emotion-Inference	female	19	disgust	2	f3		AU4	targeted	Emotion-Inference	disgust	1
1064774	Emotion-Inference	female	19	disgust	2	f3	0	AU10	targeted	Emotion-Inference	disgust	1
1064774	Emotion-Inference	female	19	fear	2	m9		AU2	non-targeted	Emotion-Inference	surprise	0
1064774	Emotion-Inference	female	19	fear	2	m9	0	AU10	non-targeted	Emotion-Inference	surprise	0
1064774	Emotion-Inference	female	19	fear	2	m9	0	AU12	non-targeted	Emotion-Inference	surprise	0
1064774	Emotion-Inference	female	19	fear	2	m9		AU4	targeted	Emotion-Inference	surprise	0
1064774	Emotion-Inference	female	19	happiness	2	f16		AU2	non-targeted	Emotion-Inference	happiness	1
1064774	Emotion-Inference	female	19	happiness	2	f16		AU4	non-targeted	Emotion-Inference	happiness	1
1064774	Emotion-Inference	female	19	happiness	2	f16	0	AU10	non-targeted	Emotion-Inference	happiness	1
1064774	Emotion-Inference	female	19	happiness	2	f16	0	AU12	targeted	Emotion-Inference	happiness	1
1064774	Emotion-Inference	female	19	sadness	2	m9		AU2	non-targeted	Emotion-Inference	sadness	1
1064774	Emotion-Inference	female	19	sadness	2	m9	0	AU10	non-targeted	Emotion-Inference	sadness	1
1064774	Emotion-Inference	female	19	sadness	2	m9	0	AU12	non-targeted	Emotion-Inference	sadness	1
1064774	Emotion-Inference	female	19	sadness	2	m9		AU4	targeted	Emotion-Inference	sadness	1
1064774	Emotion-Inference	female	19	surprise	2	m9		AU4	non-targeted	Emotion-Inference	surprise	1
1064774	Emotion-Inference	female	19	surprise	2	m9	0	AU10	non-targeted	Emotion-Inference	surprise	1
1064774	Emotion-Inference	female	19	surprise	2	m9	0	AU12	non-targeted	Emotion-Inference	surprise	1
1064774	Emotion-Inference	female	19	surprise	2	m9		AU2	targeted	Emotion-Inference	surprise	1
1064774	Emotion-Inference	female	19	anger	3	f13		AU2	non-targeted	Emotion-Inference	anger	1
1064774	Emotion-Inference	female	19	anger	3	f13	0	AU10	non-targeted	Emotion-Inference	anger	1
1064774	Emotion-Inference	female	19	anger	3	f13	0	AU12	non-targeted	Emotion-Inference	anger	1
1064774	Emotion-Inference	female	19	anger	3	f13		AU4	targeted	Emotion-Inference	anger	1
1064774	Emotion-Inference	female	19	disgust	3	m1		AU2	non-targeted	Emotion-Inference	disgust	1
1064774	Emotion-Inference	female	19	disgust	3	m1	0	AU12	non-targeted	Emotion-Inference	disgust	1
1064774	Emotion-Inference	female	19	disgust	3	m1		AU4	targeted	Emotion-Inference	disgust	1
1064774	Emotion-Inference	female	19	disgust	3	m1	0	AU10	targeted	Emotion-Inference	disgust	1
1064774	Emotion-Inference	female	19	fear	3	f13		AU2	non-targeted	Emotion-Inference	surprise	0
1064774	Emotion-Inference	female	19	fear	3	f13	0	AU10	non-targeted	Emotion-Inference	surprise	0
1064774	Emotion-Inference	female	19	fear	3	f13	0	AU12	non-targeted	Emotion-Inference	surprise	0
1064774	Emotion-Inference	female	19	fear	3	f13		AU4	targeted	Emotion-Inference	surprise	0
1064774	Emotion-Inference	female	19	happiness	3	f10		AU2	non-targeted	Emotion-Inference	happiness	1
1064774	Emotion-Inference	female	19	happiness	3	f10		AU4	non-targeted	Emotion-Inference	happiness	1
1064774	Emotion-Inference	female	19	happiness	3	f10	0	AU10	non-targeted	Emotion-Inference	happiness	1
1064774	Emotion-Inference	female	19	happiness	3	f10	0	AU12	targeted	Emotion-Inference	happiness	1
1064774	Emotion-Inference	female	19	sadness	3	f10		AU2	non-targeted	Emotion-Inference	sadness	1
1064774	Emotion-Inference	female	19	sadness	3	f10	0	AU10	non-targeted	Emotion-Inference	sadness	1
1064774	Emotion-Inference	female	19	sadness	3	f10	0	AU12	non-targeted	Emotion-Inference	sadness	1
1064774	Emotion-Inference	female	19	sadness	3	f10		AU4	targeted	Emotion-Inference	sadness	1
1064774	Emotion-Inference	female	19	surprise	3	f10		AU4	non-targeted	Emotion-Inference	surprise	1
1064774	Emotion-Inference	female	19	surprise	3	f10	0	AU10	non-targeted	Emotion-Inference	surprise	1
1064774	Emotion-Inference	female	19	surprise	3	f10	0	AU12	non-targeted	Emotion-Inference	surprise	1
1064774	Emotion-Inference	female	19	surprise	3	f10		AU2	targeted	Emotion-Inference	surprise	1
1064774	Emotion-Inference	female	19	anger	4	m10		AU2	non-targeted	Emotion-Inference	anger	1
1064774	Emotion-Inference	female	19	anger	4	m10	0	AU10	non-targeted	Emotion-Inference	anger	1
1064774	Emotion-Inference	female	19	anger	4	m10	0	AU12	non-targeted	Emotion-Inference	anger	1
1064774	Emotion-Inference	female	19	anger	4	m10		AU4	targeted	Emotion-Inference	anger	1
1064774	Emotion-Inference	female	19	disgust	4	f13		AU2	non-targeted	Emotion-Inference	fear	0
1064774	Emotion-Inference	female	19	disgust	4	f13	0	AU12	non-targeted	Emotion-Inference	fear	0
1064774	Emotion-Inference	female	19	disgust	4	f13		AU4	targeted	Emotion-Inference	fear	0
1064774	Emotion-Inference	female	19	disgust	4	f13	0	AU10	targeted	Emotion-Inference	fear	0
1064774	Emotion-Inference	female	19	fear	4	m10		AU2	non-targeted	Emotion-Inference	disgust	0
1064774	Emotion-Inference	female	19	fear	4	m10	0	AU10	non-targeted	Emotion-Inference	disgust	0
1064774	Emotion-Inference	female	19	fear	4	m10	0	AU12	non-targeted	Emotion-Inference	disgust	0
1064774	Emotion-Inference	female	19	fear	4	m10		AU4	targeted	Emotion-Inference	disgust	0
1064774	Emotion-Inference	female	19	happiness	4	m1		AU2	non-targeted	Emotion-Inference	happiness	1
1064774	Emotion-Inference	female	19	happiness	4	m1		AU4	non-targeted	Emotion-Inference	happiness	1
1064774	Emotion-Inference	female	19	happiness	4	m1	0	AU10	non-targeted	Emotion-Inference	happiness	1
1064774	Emotion-Inference	female	19	happiness	4	m1	0	AU12	targeted	Emotion-Inference	happiness	1
1064774	Emotion-Inference	female	19	sadness	4	m1		AU2	non-targeted	Emotion-Inference	sadness	1
1064774	Emotion-Inference	female	19	sadness	4	m1	0	AU10	non-targeted	Emotion-Inference	sadness	1
1064774	Emotion-Inference	female	19	sadness	4	m1	0	AU12	non-targeted	Emotion-Inference	sadness	1
1064774	Emotion-Inference	female	19	sadness	4	m1		AU4	targeted	Emotion-Inference	sadness	1
1064774	Emotion-Inference	female	19	surprise	4	m10		AU4	non-targeted	Emotion-Inference	surprise	1
1064774	Emotion-Inference	female	19	surprise	4	m10	0	AU10	non-targeted	Emotion-Inference	surprise	1
1064774	Emotion-Inference	female	19	surprise	4	m10	0	AU12	non-targeted	Emotion-Inference	surprise	1
1064774	Emotion-Inference	female	19	surprise	4	m10		AU2	targeted	Emotion-Inference	surprise	1
1064787	Emotion-Inference	male	26	anger	1	m10	0	AU2	non-targeted	Emotion-Inference	anger	1
1064787	Emotion-Inference	male	26	anger	1	m10	0	AU10	non-targeted	Emotion-Inference	anger	1
1064787	Emotion-Inference	male	26	anger	1	m10	0	AU12	non-targeted	Emotion-Inference	anger	1
1064787	Emotion-Inference	male	26	anger	1	m10	0	AU4	targeted	Emotion-Inference	anger	1
1064787	Emotion-Inference	male	26	disgust	1	f13	0	AU2	non-targeted	Emotion-Inference	sadness	0
1064787	Emotion-Inference	male	26	disgust	1	f13	0	AU12	non-targeted	Emotion-Inference	sadness	0
1064787	Emotion-Inference	male	26	disgust	1	f13	0	AU4	targeted	Emotion-Inference	sadness	0
1064787	Emotion-Inference	male	26	disgust	1	f13	0	AU10	targeted	Emotion-Inference	sadness	0
1064787	Emotion-Inference	male	26	fear	1	m10	0	AU2	non-targeted	Emotion-Inference	anger	0
1064787	Emotion-Inference	male	26	fear	1	m10	0	AU10	non-targeted	Emotion-Inference	anger	0
1064787	Emotion-Inference	male	26	fear	1	m10	0	AU12	non-targeted	Emotion-Inference	anger	0
1064787	Emotion-Inference	male	26	fear	1	m10	0	AU4	targeted	Emotion-Inference	anger	0
1064787	Emotion-Inference	male	26	happiness	1	m1	0	AU2	non-targeted	Emotion-Inference	happiness	1
1064787	Emotion-Inference	male	26	happiness	1	m1	0	AU4	non-targeted	Emotion-Inference	happiness	1
1064787	Emotion-Inference	male	26	happiness	1	m1	0	AU10	non-targeted	Emotion-Inference	happiness	1
1064787	Emotion-Inference	male	26	happiness	1	m1	0	AU12	targeted	Emotion-Inference	happiness	1
1064787	Emotion-Inference	male	26	sadness	1	m1	0	AU2	non-targeted	Emotion-Inference	sadness	1
1064787	Emotion-Inference	male	26	sadness	1	m1	0	AU10	non-targeted	Emotion-Inference	sadness	1
1064787	Emotion-Inference	male	26	sadness	1	m1	0	AU12	non-targeted	Emotion-Inference	sadness	1
1064787	Emotion-Inference	male	26	sadness	1	m1	0	AU4	targeted	Emotion-Inference	sadness	1
1064787	Emotion-Inference	male	26	surprise	1	m10	0	AU4	non-targeted	Emotion-Inference	surprise	1
1064787	Emotion-Inference	male	26	surprise	1	m10	0	AU10	non-targeted	Emotion-Inference	surprise	1
1064787	Emotion-Inference	male	26	surprise	1	m10	0	AU12	non-targeted	Emotion-Inference	surprise	1
1064787	Emotion-Inference	male	26	surprise	1	m10	0	AU2	targeted	Emotion-Inference	surprise	1
1064787	Emotion-Inference	male	26	anger	2	f13	0	AU2	non-targeted	Emotion-Inference	anger	1
1064787	Emotion-Inference	male	26	anger	2	f13	0	AU10	non-targeted	Emotion-Inference	anger	1
1064787	Emotion-Inference	male	26	anger	2	f13	0	AU12	non-targeted	Emotion-Inference	anger	1
1064787	Emotion-Inference	male	26	anger	2	f13	0	AU4	targeted	Emotion-Inference	anger	1
1064787	Emotion-Inference	male	26	disgust	2	m1	0	AU2	non-targeted	Emotion-Inference	anger	0
1064787	Emotion-Inference	male	26	disgust	2	m1	0	AU12	non-targeted	Emotion-Inference	anger	0
1064787	Emotion-Inference	male	26	disgust	2	m1	0	AU4	targeted	Emotion-Inference	anger	0
1064787	Emotion-Inference	male	26	disgust	2	m1	0	AU10	targeted	Emotion-Inference	anger	0
1064787	Emotion-Inference	male	26	fear	2	f13	0	AU2	non-targeted	Emotion-Inference	disgust	0
1064787	Emotion-Inference	male	26	fear	2	f13	0	AU10	non-targeted	Emotion-Inference	disgust	0
1064787	Emotion-Inference	male	26	fear	2	f13	0	AU12	non-targeted	Emotion-Inference	disgust	0
1064787	Emotion-Inference	male	26	fear	2	f13	0	AU4	targeted	Emotion-Inference	disgust	0
1064787	Emotion-Inference	male	26	happiness	2	f10	0	AU2	non-targeted	Emotion-Inference	happiness	1
1064787	Emotion-Inference	male	26	happiness	2	f10	0	AU4	non-targeted	Emotion-Inference	happiness	1
1064787	Emotion-Inference	male	26	happiness	2	f10	0	AU10	non-targeted	Emotion-Inference	happiness	1
1064787	Emotion-Inference	male	26	happiness	2	f10	0	AU12	targeted	Emotion-Inference	happiness	1
1064787	Emotion-Inference	male	26	sadness	2	f10	0	AU2	non-targeted	Emotion-Inference	sadness	1
1064787	Emotion-Inference	male	26	sadness	2	f10	0	AU10	non-targeted	Emotion-Inference	sadness	1
1064787	Emotion-Inference	male	26	sadness	2	f10	0	AU12	non-targeted	Emotion-Inference	sadness	1
1064787	Emotion-Inference	male	26	sadness	2	f10	0	AU4	targeted	Emotion-Inference	sadness	1
1064787	Emotion-Inference	male	26	surprise	2	f10	0	AU4	non-targeted	Emotion-Inference	surprise	1
1064787	Emotion-Inference	male	26	surprise	2	f10	0	AU10	non-targeted	Emotion-Inference	surprise	1
1064787	Emotion-Inference	male	26	surprise	2	f10	0	AU12	non-targeted	Emotion-Inference	surprise	1
1064787	Emotion-Inference	male	26	surprise	2	f10	0	AU2	targeted	Emotion-Inference	surprise	1
1064787	Emotion-Inference	male	26	anger	3	m9	0	AU2	non-targeted	Emotion-Inference	anger	1
1064787	Emotion-Inference	male	26	anger	3	m9	0	AU10	non-targeted	Emotion-Inference	anger	1
1064787	Emotion-Inference	male	26	anger	3	m9	0	AU12	non-targeted	Emotion-Inference	anger	1
1064787	Emotion-Inference	male	26	anger	3	m9	0	AU4	targeted	Emotion-Inference	anger	1
1064787	Emotion-Inference	male	26	disgust	3	f3	0	AU2	non-targeted	Emotion-Inference	disgust	1
1064787	Emotion-Inference	male	26	disgust	3	f3	0	AU12	non-targeted	Emotion-Inference	disgust	1
1064787	Emotion-Inference	male	26	disgust	3	f3	0	AU4	targeted	Emotion-Inference	disgust	1
1064787	Emotion-Inference	male	26	disgust	3	f3	0	AU10	targeted	Emotion-Inference	disgust	1
1064787	Emotion-Inference	male	26	fear	3	m9	0	AU2	non-targeted	Emotion-Inference	fear	1
1064787	Emotion-Inference	male	26	fear	3	m9	0	AU10	non-targeted	Emotion-Inference	fear	1
1064787	Emotion-Inference	male	26	fear	3	m9	0	AU12	non-targeted	Emotion-Inference	fear	1
1064787	Emotion-Inference	male	26	fear	3	m9	0	AU4	targeted	Emotion-Inference	fear	1
1064787	Emotion-Inference	male	26	happiness	3	f16	0	AU2	non-targeted	Emotion-Inference	happiness	1
1064787	Emotion-Inference	male	26	happiness	3	f16	0	AU4	non-targeted	Emotion-Inference	happiness	1
1064787	Emotion-Inference	male	26	happiness	3	f16	0	AU10	non-targeted	Emotion-Inference	happiness	1
1064787	Emotion-Inference	male	26	happiness	3	f16	0	AU12	targeted	Emotion-Inference	happiness	1
1064787	Emotion-Inference	male	26	sadness	3	m9	0	AU2	non-targeted	Emotion-Inference	sadness	1
1064787	Emotion-Inference	male	26	sadness	3	m9	0	AU10	non-targeted	Emotion-Inference	sadness	1
1064787	Emotion-Inference	male	26	sadness	3	m9	0	AU12	non-targeted	Emotion-Inference	sadness	1
1064787	Emotion-Inference	male	26	sadness	3	m9	0	AU4	targeted	Emotion-Inference	sadness	1
1064787	Emotion-Inference	male	26	surprise	3	m9	0	AU4	non-targeted	Emotion-Inference	surprise	1
1064787	Emotion-Inference	male	26	surprise	3	m9	0	AU10	non-targeted	Emotion-Inference	surprise	1
1064787	Emotion-Inference	male	26	surprise	3	m9	0	AU12	non-targeted	Emotion-Inference	surprise	1
1064787	Emotion-Inference	male	26	surprise	3	m9	0	AU2	targeted	Emotion-Inference	surprise	1
1064787	Emotion-Inference	male	26	anger	4	f3	0	AU2	non-targeted	Emotion-Inference	anger	1
1064787	Emotion-Inference	male	26	anger	4	f3	0	AU10	non-targeted	Emotion-Inference	anger	1
1064787	Emotion-Inference	male	26	anger	4	f3	0	AU12	non-targeted	Emotion-Inference	anger	1
1064787	Emotion-Inference	male	26	anger	4	f3	0	AU4	targeted	Emotion-Inference	anger	1
1064787	Emotion-Inference	male	26	disgust	4	m6		AU2	non-targeted	Emotion-Inference	sadness	0
1064787	Emotion-Inference	male	26	disgust	4	m6		AU12	non-targeted	Emotion-Inference	sadness	0
1064787	Emotion-Inference	male	26	disgust	4	m6		AU4	targeted	Emotion-Inference	sadness	0
1064787	Emotion-Inference	male	26	disgust	4	m6		AU10	targeted	Emotion-Inference	sadness	0
1064787	Emotion-Inference	male	26	fear	4	f3	0	AU2	non-targeted	Emotion-Inference	fear	1
1064787	Emotion-Inference	male	26	fear	4	f3	0	AU10	non-targeted	Emotion-Inference	fear	1
1064787	Emotion-Inference	male	26	fear	4	f3	0	AU12	non-targeted	Emotion-Inference	fear	1
1064787	Emotion-Inference	male	26	fear	4	f3	0	AU4	targeted	Emotion-Inference	fear	1
1064787	Emotion-Inference	male	26	happiness	4	m6	0	AU2	non-targeted	Emotion-Inference	happiness	1
1064787	Emotion-Inference	male	26	happiness	4	m6	0	AU4	non-targeted	Emotion-Inference	happiness	1
1064787	Emotion-Inference	male	26	happiness	4	m6	0	AU10	non-targeted	Emotion-Inference	happiness	1
1064787	Emotion-Inference	male	26	happiness	4	m6	0	AU12	targeted	Emotion-Inference	happiness	1
1064787	Emotion-Inference	male	26	sadness	4	f16	0	AU2	non-targeted	Emotion-Inference	sadness	1
1064787	Emotion-Inference	male	26	sadness	4	f16	0	AU10	non-targeted	Emotion-Inference	sadness	1
1064787	Emotion-Inference	male	26	sadness	4	f16	0	AU12	non-targeted	Emotion-Inference	sadness	1
1064787	Emotion-Inference	male	26	sadness	4	f16	0	AU4	targeted	Emotion-Inference	sadness	1
1064787	Emotion-Inference	male	26	surprise	4	f3	0	AU4	non-targeted	Emotion-Inference	surprise	1
1064787	Emotion-Inference	male	26	surprise	4	f3	0	AU10	non-targeted	Emotion-Inference	surprise	1
1064787	Emotion-Inference	male	26	surprise	4	f3	0	AU12	non-targeted	Emotion-Inference	surprise	1
1064787	Emotion-Inference	male	26	surprise	4	f3	0	AU2	targeted	Emotion-Inference	surprise	1
1064841	Emotion-Inference	female	19	anger	1	m10	0	AU2	non-targeted	Emotion-Inference	anger	1
1064841	Emotion-Inference	female	19	anger	1	m10	0	AU10	non-targeted	Emotion-Inference	anger	1
1064841	Emotion-Inference	female	19	anger	1	m10	0	AU12	non-targeted	Emotion-Inference	anger	1
1064841	Emotion-Inference	female	19	anger	1	m10	1	AU4	targeted	Emotion-Inference	anger	1
1064841	Emotion-Inference	female	19	disgust	1	f13	0	AU2	non-targeted	Emotion-Inference	sadness	0
1064841	Emotion-Inference	female	19	disgust	1	f13	0	AU12	non-targeted	Emotion-Inference	sadness	0
1064841	Emotion-Inference	female	19	disgust	1	f13	1	AU4	targeted	Emotion-Inference	sadness	0
1064841	Emotion-Inference	female	19	disgust	1	f13	0	AU10	targeted	Emotion-Inference	sadness	0
1064841	Emotion-Inference	female	19	fear	1	m10	0	AU2	non-targeted	Emotion-Inference	anger	0
1064841	Emotion-Inference	female	19	fear	1	m10	0	AU10	non-targeted	Emotion-Inference	anger	0
1064841	Emotion-Inference	female	19	fear	1	m10	0	AU12	non-targeted	Emotion-Inference	anger	0
1064841	Emotion-Inference	female	19	fear	1	m10	0	AU4	targeted	Emotion-Inference	anger	0
1064841	Emotion-Inference	female	19	happiness	1	m1	0	AU2	non-targeted	Emotion-Inference	happiness	1
1064841	Emotion-Inference	female	19	happiness	1	m1		AU4	non-targeted	Emotion-Inference	happiness	1
1064841	Emotion-Inference	female	19	happiness	1	m1	0	AU10	non-targeted	Emotion-Inference	happiness	1
1064841	Emotion-Inference	female	19	happiness	1	m1	0	AU12	targeted	Emotion-Inference	happiness	1
1064841	Emotion-Inference	female	19	sadness	1	m1	0	AU2	non-targeted	Emotion-Inference	sadness	1
1064841	Emotion-Inference	female	19	sadness	1	m1	0	AU10	non-targeted	Emotion-Inference	sadness	1
1064841	Emotion-Inference	female	19	sadness	1	m1	0	AU12	non-targeted	Emotion-Inference	sadness	1
1064841	Emotion-Inference	female	19	sadness	1	m1	1	AU4	targeted	Emotion-Inference	sadness	1
1064841	Emotion-Inference	female	19	surprise	1	m10	0	AU4	non-targeted	Emotion-Inference	surprise	1
1064841	Emotion-Inference	female	19	surprise	1	m10	0	AU10	non-targeted	Emotion-Inference	surprise	1
1064841	Emotion-Inference	female	19	surprise	1	m10	0	AU12	non-targeted	Emotion-Inference	surprise	1
1064841	Emotion-Inference	female	19	surprise	1	m10	1	AU2	targeted	Emotion-Inference	surprise	1
1064841	Emotion-Inference	female	19	anger	2	f13	0	AU2	non-targeted	Emotion-Inference	anger	1
1064841	Emotion-Inference	female	19	anger	2	f13	0	AU10	non-targeted	Emotion-Inference	anger	1
1064841	Emotion-Inference	female	19	anger	2	f13	0	AU12	non-targeted	Emotion-Inference	anger	1
1064841	Emotion-Inference	female	19	anger	2	f13	0	AU4	targeted	Emotion-Inference	anger	1
1064841	Emotion-Inference	female	19	disgust	2	m1	0	AU2	non-targeted	Emotion-Inference	disgust	1
1064841	Emotion-Inference	female	19	disgust	2	m1	0	AU12	non-targeted	Emotion-Inference	disgust	1
1064841	Emotion-Inference	female	19	disgust	2	m1	0	AU4	targeted	Emotion-Inference	disgust	1
1064841	Emotion-Inference	female	19	disgust	2	m1	0	AU10	targeted	Emotion-Inference	disgust	1
1064841	Emotion-Inference	female	19	fear	2	f13	0	AU2	non-targeted	Emotion-Inference	disgust	0
1064841	Emotion-Inference	female	19	fear	2	f13	0	AU10	non-targeted	Emotion-Inference	disgust	0
1064841	Emotion-Inference	female	19	fear	2	f13	0	AU12	non-targeted	Emotion-Inference	disgust	0
1064841	Emotion-Inference	female	19	fear	2	f13	1	AU4	targeted	Emotion-Inference	disgust	0
1064841	Emotion-Inference	female	19	happiness	2	f10	0	AU2	non-targeted	Emotion-Inference	happiness	1
1064841	Emotion-Inference	female	19	happiness	2	f10	0	AU4	non-targeted	Emotion-Inference	happiness	1
1064841	Emotion-Inference	female	19	happiness	2	f10	0	AU10	non-targeted	Emotion-Inference	happiness	1
1064841	Emotion-Inference	female	19	happiness	2	f10	0	AU12	targeted	Emotion-Inference	happiness	1
1064841	Emotion-Inference	female	19	sadness	2	f10	0	AU2	non-targeted	Emotion-Inference	sadness	1
1064841	Emotion-Inference	female	19	sadness	2	f10	0	AU10	non-targeted	Emotion-Inference	sadness	1
1064841	Emotion-Inference	female	19	sadness	2	f10	0	AU12	non-targeted	Emotion-Inference	sadness	1
1064841	Emotion-Inference	female	19	sadness	2	f10	1	AU4	targeted	Emotion-Inference	sadness	1
1064841	Emotion-Inference	female	19	surprise	2	f10	0	AU4	non-targeted	Emotion-Inference	surprise	1
1064841	Emotion-Inference	female	19	surprise	2	f10	0	AU10	non-targeted	Emotion-Inference	surprise	1
1064841	Emotion-Inference	female	19	surprise	2	f10	0	AU12	non-targeted	Emotion-Inference	surprise	1
1064841	Emotion-Inference	female	19	surprise	2	f10	0	AU2	targeted	Emotion-Inference	surprise	1
1064841	Emotion-Inference	female	19	anger	3	m9	0	AU2	non-targeted	Emotion-Inference	anger	1
1064841	Emotion-Inference	female	19	anger	3	m9	0	AU10	non-targeted	Emotion-Inference	anger	1
1064841	Emotion-Inference	female	19	anger	3	m9	0	AU12	non-targeted	Emotion-Inference	anger	1
1064841	Emotion-Inference	female	19	anger	3	m9	0	AU4	targeted	Emotion-Inference	anger	1
1064841	Emotion-Inference	female	19	disgust	3	f3		AU2	non-targeted	Emotion-Inference	disgust	1
1064841	Emotion-Inference	female	19	disgust	3	f3		AU12	non-targeted	Emotion-Inference	disgust	1
1064841	Emotion-Inference	female	19	disgust	3	f3		AU4	targeted	Emotion-Inference	disgust	1
1064841	Emotion-Inference	female	19	disgust	3	f3		AU10	targeted	Emotion-Inference	disgust	1
1064841	Emotion-Inference	female	19	fear	3	m9	0	AU2	non-targeted	Emotion-Inference	disgust	0
1064841	Emotion-Inference	female	19	fear	3	m9	0	AU10	non-targeted	Emotion-Inference	disgust	0
1064841	Emotion-Inference	female	19	fear	3	m9	0	AU12	non-targeted	Emotion-Inference	disgust	0
1064841	Emotion-Inference	female	19	fear	3	m9	0	AU4	targeted	Emotion-Inference	disgust	0
1064841	Emotion-Inference	female	19	happiness	3	f16	0	AU2	non-targeted	Emotion-Inference	happiness	1
1064841	Emotion-Inference	female	19	happiness	3	f16	0	AU4	non-targeted	Emotion-Inference	happiness	1
1064841	Emotion-Inference	female	19	happiness	3	f16	0	AU10	non-targeted	Emotion-Inference	happiness	1
1064841	Emotion-Inference	female	19	happiness	3	f16	0	AU12	targeted	Emotion-Inference	happiness	1
1064841	Emotion-Inference	female	19	sadness	3	m9	0	AU2	non-targeted	Emotion-Inference	sadness	1
1064841	Emotion-Inference	female	19	sadness	3	m9	0	AU10	non-targeted	Emotion-Inference	sadness	1
1064841	Emotion-Inference	female	19	sadness	3	m9	0	AU12	non-targeted	Emotion-Inference	sadness	1
1064841	Emotion-Inference	female	19	sadness	3	m9	1	AU4	targeted	Emotion-Inference	sadness	1
1064841	Emotion-Inference	female	19	surprise	3	m9	0	AU4	non-targeted	Emotion-Inference	surprise	1
1064841	Emotion-Inference	female	19	surprise	3	m9	0	AU10	non-targeted	Emotion-Inference	surprise	1
1064841	Emotion-Inference	female	19	surprise	3	m9	0	AU12	non-targeted	Emotion-Inference	surprise	1
1064841	Emotion-Inference	female	19	surprise	3	m9	0	AU2	targeted	Emotion-Inference	surprise	1
1064841	Emotion-Inference	female	19	anger	4	f3	0	AU2	non-targeted	Emotion-Inference	anger	1
1064841	Emotion-Inference	female	19	anger	4	f3	0	AU10	non-targeted	Emotion-Inference	anger	1
1064841	Emotion-Inference	female	19	anger	4	f3	0	AU12	non-targeted	Emotion-Inference	anger	1
1064841	Emotion-Inference	female	19	anger	4	f3		AU4	targeted	Emotion-Inference	anger	1
1064841	Emotion-Inference	female	19	disgust	4	m6	0	AU2	non-targeted	Emotion-Inference	disgust	1
1064841	Emotion-Inference	female	19	disgust	4	m6	0	AU12	non-targeted	Emotion-Inference	disgust	1
1064841	Emotion-Inference	female	19	disgust	4	m6	0	AU4	targeted	Emotion-Inference	disgust	1
1064841	Emotion-Inference	female	19	disgust	4	m6	0	AU10	targeted	Emotion-Inference	disgust	1
1064841	Emotion-Inference	female	19	fear	4	f3	0	AU2	non-targeted	Emotion-Inference	sadness	0
1064841	Emotion-Inference	female	19	fear	4	f3	0	AU10	non-targeted	Emotion-Inference	sadness	0
1064841	Emotion-Inference	female	19	fear	4	f3	0	AU12	non-targeted	Emotion-Inference	sadness	0
1064841	Emotion-Inference	female	19	fear	4	f3	0	AU4	targeted	Emotion-Inference	sadness	0
1064841	Emotion-Inference	female	19	happiness	4	m6	0	AU2	non-targeted	Emotion-Inference	happiness	1
1064841	Emotion-Inference	female	19	happiness	4	m6	0	AU4	non-targeted	Emotion-Inference	happiness	1
1064841	Emotion-Inference	female	19	happiness	4	m6	0	AU10	non-targeted	Emotion-Inference	happiness	1
1064841	Emotion-Inference	female	19	happiness	4	m6	0	AU12	targeted	Emotion-Inference	happiness	1
1064841	Emotion-Inference	female	19	sadness	4	f16	0	AU2	non-targeted	Emotion-Inference	disgust	0
1064841	Emotion-Inference	female	19	sadness	4	f16	0	AU10	non-targeted	Emotion-Inference	disgust	0
1064841	Emotion-Inference	female	19	sadness	4	f16	0	AU12	non-targeted	Emotion-Inference	disgust	0
1064841	Emotion-Inference	female	19	sadness	4	f16	1	AU4	targeted	Emotion-Inference	disgust	0
1064841	Emotion-Inference	female	19	surprise	4	f3	0	AU4	non-targeted	Emotion-Inference	surprise	1
1064841	Emotion-Inference	female	19	surprise	4	f3	0	AU10	non-targeted	Emotion-Inference	surprise	1
1064841	Emotion-Inference	female	19	surprise	4	f3	0	AU12	non-targeted	Emotion-Inference	surprise	1
1064841	Emotion-Inference	female	19	surprise	4	f3	1	AU2	targeted	Emotion-Inference	surprise	1
1064910	Emotion-Inference	female	20	anger	1	m10	0	AU2	non-targeted	Emotion-Inference	anger	1
1064910	Emotion-Inference	female	20	anger	1	m10	0	AU10	non-targeted	Emotion-Inference	anger	1
1064910	Emotion-Inference	female	20	anger	1	m10	0	AU12	non-targeted	Emotion-Inference	anger	1
1064910	Emotion-Inference	female	20	anger	1	m10	0	AU4	targeted	Emotion-Inference	anger	1
1064910	Emotion-Inference	female	20	disgust	1	f13	0	AU2	non-targeted	Emotion-Inference	sadness	0
1064910	Emotion-Inference	female	20	disgust	1	f13	0	AU12	non-targeted	Emotion-Inference	sadness	0
1064910	Emotion-Inference	female	20	disgust	1	f13	1	AU4	targeted	Emotion-Inference	sadness	0
1064910	Emotion-Inference	female	20	disgust	1	f13	0	AU10	targeted	Emotion-Inference	sadness	0
1064910	Emotion-Inference	female	20	fear	1	m10	0	AU2	non-targeted	Emotion-Inference	surprise	0
1064910	Emotion-Inference	female	20	fear	1	m10	0	AU10	non-targeted	Emotion-Inference	surprise	0
1064910	Emotion-Inference	female	20	fear	1	m10	0	AU12	non-targeted	Emotion-Inference	surprise	0
1064910	Emotion-Inference	female	20	fear	1	m10	0	AU4	targeted	Emotion-Inference	surprise	0
1064910	Emotion-Inference	female	20	happiness	1	m1	0	AU2	non-targeted	Emotion-Inference	happiness	1
1064910	Emotion-Inference	female	20	happiness	1	m1	0	AU4	non-targeted	Emotion-Inference	happiness	1
1064910	Emotion-Inference	female	20	happiness	1	m1	1	AU10	non-targeted	Emotion-Inference	happiness	1
1064910	Emotion-Inference	female	20	happiness	1	m1	0	AU12	targeted	Emotion-Inference	happiness	1
1064910	Emotion-Inference	female	20	sadness	1	m1	0	AU2	non-targeted	Emotion-Inference	sadness	1
1064910	Emotion-Inference	female	20	sadness	1	m1	0	AU10	non-targeted	Emotion-Inference	sadness	1
1064910	Emotion-Inference	female	20	sadness	1	m1	0	AU12	non-targeted	Emotion-Inference	sadness	1
1064910	Emotion-Inference	female	20	sadness	1	m1	0	AU4	targeted	Emotion-Inference	sadness	1
1064910	Emotion-Inference	female	20	surprise	1	m10	0	AU4	non-targeted	Emotion-Inference	surprise	1
1064910	Emotion-Inference	female	20	surprise	1	m10	0	AU10	non-targeted	Emotion-Inference	surprise	1
1064910	Emotion-Inference	female	20	surprise	1	m10	0	AU12	non-targeted	Emotion-Inference	surprise	1
1064910	Emotion-Inference	female	20	surprise	1	m10	0	AU2	targeted	Emotion-Inference	surprise	1
1064910	Emotion-Inference	female	20	anger	2	f13	0	AU2	non-targeted	Emotion-Inference	anger	1
1064910	Emotion-Inference	female	20	anger	2	f13	0	AU10	non-targeted	Emotion-Inference	anger	1
1064910	Emotion-Inference	female	20	anger	2	f13	0	AU12	non-targeted	Emotion-Inference	anger	1
1064910	Emotion-Inference	female	20	anger	2	f13	0	AU4	targeted	Emotion-Inference	anger	1
1064910	Emotion-Inference	female	20	disgust	2	m1	0	AU2	non-targeted	Emotion-Inference	disgust	1
1064910	Emotion-Inference	female	20	disgust	2	m1	0	AU12	non-targeted	Emotion-Inference	disgust	1
1064910	Emotion-Inference	female	20	disgust	2	m1	0	AU4	targeted	Emotion-Inference	disgust	1
1064910	Emotion-Inference	female	20	disgust	2	m1	0	AU10	targeted	Emotion-Inference	disgust	1
1064910	Emotion-Inference	female	20	fear	2	f13	0	AU2	non-targeted	Emotion-Inference	disgust	0
1064910	Emotion-Inference	female	20	fear	2	f13	0	AU10	non-targeted	Emotion-Inference	disgust	0
1064910	Emotion-Inference	female	20	fear	2	f13	0	AU12	non-targeted	Emotion-Inference	disgust	0
1064910	Emotion-Inference	female	20	fear	2	f13	0	AU4	targeted	Emotion-Inference	disgust	0
1064910	Emotion-Inference	female	20	happiness	2	f10	0	AU2	non-targeted	Emotion-Inference	happiness	1
1064910	Emotion-Inference	female	20	happiness	2	f10	0	AU4	non-targeted	Emotion-Inference	happiness	1
1064910	Emotion-Inference	female	20	happiness	2	f10	1	AU10	non-targeted	Emotion-Inference	happiness	1
1064910	Emotion-Inference	female	20	happiness	2	f10	0	AU12	targeted	Emotion-Inference	happiness	1
1064910	Emotion-Inference	female	20	sadness	2	f10	0	AU2	non-targeted	Emotion-Inference	disgust	0
1064910	Emotion-Inference	female	20	sadness	2	f10	0	AU10	non-targeted	Emotion-Inference	disgust	0
1064910	Emotion-Inference	female	20	sadness	2	f10	0	AU12	non-targeted	Emotion-Inference	disgust	0
1064910	Emotion-Inference	female	20	sadness	2	f10	1	AU4	targeted	Emotion-Inference	disgust	0
1064910	Emotion-Inference	female	20	surprise	2	f10	0	AU4	non-targeted	Emotion-Inference	surprise	1
1064910	Emotion-Inference	female	20	surprise	2	f10	0	AU10	non-targeted	Emotion-Inference	surprise	1
1064910	Emotion-Inference	female	20	surprise	2	f10	0	AU12	non-targeted	Emotion-Inference	surprise	1
1064910	Emotion-Inference	female	20	surprise	2	f10	0	AU2	targeted	Emotion-Inference	surprise	1
1064910	Emotion-Inference	female	20	anger	3	m9	0	AU2	non-targeted	Emotion-Inference	anger	1
1064910	Emotion-Inference	female	20	anger	3	m9	0	AU10	non-targeted	Emotion-Inference	anger	1
1064910	Emotion-Inference	female	20	anger	3	m9	0	AU12	non-targeted	Emotion-Inference	anger	1
1064910	Emotion-Inference	female	20	anger	3	m9	0	AU4	targeted	Emotion-Inference	anger	1
1064910	Emotion-Inference	female	20	disgust	3	f3	0	AU2	non-targeted	Emotion-Inference	disgust	1
1064910	Emotion-Inference	female	20	disgust	3	f3	0	AU12	non-targeted	Emotion-Inference	disgust	1
1064910	Emotion-Inference	female	20	disgust	3	f3	0	AU4	targeted	Emotion-Inference	disgust	1
1064910	Emotion-Inference	female	20	disgust	3	f3	0	AU10	targeted	Emotion-Inference	disgust	1
1064910	Emotion-Inference	female	20	fear	3	m9	0	AU2	non-targeted	Emotion-Inference	fear	1
1064910	Emotion-Inference	female	20	fear	3	m9	0	AU10	non-targeted	Emotion-Inference	fear	1
1064910	Emotion-Inference	female	20	fear	3	m9	0	AU12	non-targeted	Emotion-Inference	fear	1
1064910	Emotion-Inference	female	20	fear	3	m9	0	AU4	targeted	Emotion-Inference	fear	1
1064910	Emotion-Inference	female	20	happiness	3	f16	0	AU2	non-targeted	Emotion-Inference	happiness	1
1064910	Emotion-Inference	female	20	happiness	3	f16	0	AU4	non-targeted	Emotion-Inference	happiness	1
1064910	Emotion-Inference	female	20	happiness	3	f16	0	AU10	non-targeted	Emotion-Inference	happiness	1
1064910	Emotion-Inference	female	20	happiness	3	f16	0	AU12	targeted	Emotion-Inference	happiness	1
1064910	Emotion-Inference	female	20	sadness	3	m9	0	AU2	non-targeted	Emotion-Inference	sadness	1
1064910	Emotion-Inference	female	20	sadness	3	m9	0	AU10	non-targeted	Emotion-Inference	sadness	1
1064910	Emotion-Inference	female	20	sadness	3	m9	0	AU12	non-targeted	Emotion-Inference	sadness	1
1064910	Emotion-Inference	female	20	sadness	3	m9	1	AU4	targeted	Emotion-Inference	sadness	1
1064910	Emotion-Inference	female	20	surprise	3	m9	0	AU4	non-targeted	Emotion-Inference	surprise	1
1064910	Emotion-Inference	female	20	surprise	3	m9	0	AU10	non-targeted	Emotion-Inference	surprise	1
1064910	Emotion-Inference	female	20	surprise	3	m9	0	AU12	non-targeted	Emotion-Inference	surprise	1
1064910	Emotion-Inference	female	20	surprise	3	m9	0	AU2	targeted	Emotion-Inference	surprise	1
1064910	Emotion-Inference	female	20	anger	4	f3	0	AU2	non-targeted	Emotion-Inference	anger	1
1064910	Emotion-Inference	female	20	anger	4	f3	0	AU10	non-targeted	Emotion-Inference	anger	1
1064910	Emotion-Inference	female	20	anger	4	f3	0	AU12	non-targeted	Emotion-Inference	anger	1
1064910	Emotion-Inference	female	20	anger	4	f3	0	AU4	targeted	Emotion-Inference	anger	1
1064910	Emotion-Inference	female	20	disgust	4	m6	0	AU2	non-targeted	Emotion-Inference	disgust	1
1064910	Emotion-Inference	female	20	disgust	4	m6	0	AU12	non-targeted	Emotion-Inference	disgust	1
1064910	Emotion-Inference	female	20	disgust	4	m6	0	AU4	targeted	Emotion-Inference	disgust	1
1064910	Emotion-Inference	female	20	disgust	4	m6	0	AU10	targeted	Emotion-Inference	disgust	1
1064910	Emotion-Inference	female	20	fear	4	f3	0	AU2	non-targeted	Emotion-Inference	fear	1
1064910	Emotion-Inference	female	20	fear	4	f3	0	AU10	non-targeted	Emotion-Inference	fear	1
1064910	Emotion-Inference	female	20	fear	4	f3	0	AU12	non-targeted	Emotion-Inference	fear	1
1064910	Emotion-Inference	female	20	fear	4	f3	0	AU4	targeted	Emotion-Inference	fear	1
1064910	Emotion-Inference	female	20	happiness	4	m6	0	AU2	non-targeted	Emotion-Inference	happiness	1
1064910	Emotion-Inference	female	20	happiness	4	m6	0	AU4	non-targeted	Emotion-Inference	happiness	1
1064910	Emotion-Inference	female	20	happiness	4	m6	0	AU10	non-targeted	Emotion-Inference	happiness	1
1064910	Emotion-Inference	female	20	happiness	4	m6	0	AU12	targeted	Emotion-Inference	happiness	1
1064910	Emotion-Inference	female	20	sadness	4	f16	0	AU2	non-targeted	Emotion-Inference	sadness	1
1064910	Emotion-Inference	female	20	sadness	4	f16	0	AU10	non-targeted	Emotion-Inference	sadness	1
1064910	Emotion-Inference	female	20	sadness	4	f16	0	AU12	non-targeted	Emotion-Inference	sadness	1
1064910	Emotion-Inference	female	20	sadness	4	f16	1	AU4	targeted	Emotion-Inference	sadness	1
1064910	Emotion-Inference	female	20	surprise	4	f3	0	AU4	non-targeted	Emotion-Inference	surprise	1
1064910	Emotion-Inference	female	20	surprise	4	f3	0	AU10	non-targeted	Emotion-Inference	surprise	1
1064910	Emotion-Inference	female	20	surprise	4	f3	0	AU12	non-targeted	Emotion-Inference	surprise	1
1064910	Emotion-Inference	female	20	surprise	4	f3	0	AU2	targeted	Emotion-Inference	surprise	1
1064920	Emotion-Inference	male	19	anger	1	f3	0	AU2	non-targeted	Emotion-Inference	anger	1
1064920	Emotion-Inference	male	19	anger	1	f3	0	AU10	non-targeted	Emotion-Inference	anger	1
1064920	Emotion-Inference	male	19	anger	1	f3	0	AU12	non-targeted	Emotion-Inference	anger	1
1064920	Emotion-Inference	male	19	anger	1	f3	0	AU4	targeted	Emotion-Inference	anger	1
1064920	Emotion-Inference	male	19	disgust	1	m6	0	AU2	non-targeted	Emotion-Inference	disgust	1
1064920	Emotion-Inference	male	19	disgust	1	m6	0	AU12	non-targeted	Emotion-Inference	disgust	1
1064920	Emotion-Inference	male	19	disgust	1	m6	1	AU4	targeted	Emotion-Inference	disgust	1
1064920	Emotion-Inference	male	19	disgust	1	m6	0	AU10	targeted	Emotion-Inference	disgust	1
1064920	Emotion-Inference	male	19	fear	1	f3	0	AU2	non-targeted	Emotion-Inference	fear	1
1064920	Emotion-Inference	male	19	fear	1	f3	0	AU10	non-targeted	Emotion-Inference	fear	1
1064920	Emotion-Inference	male	19	fear	1	f3	0	AU12	non-targeted	Emotion-Inference	fear	1
1064920	Emotion-Inference	male	19	fear	1	f3	0	AU4	targeted	Emotion-Inference	fear	1
1064920	Emotion-Inference	male	19	happiness	1	m6	0	AU2	non-targeted	Emotion-Inference	happiness	1
1064920	Emotion-Inference	male	19	happiness	1	m6	0	AU4	non-targeted	Emotion-Inference	happiness	1
1064920	Emotion-Inference	male	19	happiness	1	m6	0	AU10	non-targeted	Emotion-Inference	happiness	1
1064920	Emotion-Inference	male	19	happiness	1	m6	0	AU12	targeted	Emotion-Inference	happiness	1
1064920	Emotion-Inference	male	19	sadness	1	f16	0	AU2	non-targeted	Emotion-Inference	sadness	1
1064920	Emotion-Inference	male	19	sadness	1	f16	0	AU10	non-targeted	Emotion-Inference	sadness	1
1064920	Emotion-Inference	male	19	sadness	1	f16	0	AU12	non-targeted	Emotion-Inference	sadness	1
1064920	Emotion-Inference	male	19	sadness	1	f16	0	AU4	targeted	Emotion-Inference	sadness	1
1064920	Emotion-Inference	male	19	surprise	1	f3	0	AU4	non-targeted	Emotion-Inference	surprise	1
1064920	Emotion-Inference	male	19	surprise	1	f3	0	AU10	non-targeted	Emotion-Inference	surprise	1
1064920	Emotion-Inference	male	19	surprise	1	f3	0	AU12	non-targeted	Emotion-Inference	surprise	1
1064920	Emotion-Inference	male	19	surprise	1	f3	0	AU2	targeted	Emotion-Inference	surprise	1
1064920	Emotion-Inference	male	19	anger	2	m9	0	AU2	non-targeted	Emotion-Inference	anger	1
1064920	Emotion-Inference	male	19	anger	2	m9	0	AU10	non-targeted	Emotion-Inference	anger	1
1064920	Emotion-Inference	male	19	anger	2	m9	0	AU12	non-targeted	Emotion-Inference	anger	1
1064920	Emotion-Inference	male	19	anger	2	m9	1	AU4	targeted	Emotion-Inference	anger	1
1064920	Emotion-Inference	male	19	disgust	2	f3	0	AU2	non-targeted	Emotion-Inference	disgust	1
1064920	Emotion-Inference	male	19	disgust	2	f3	0	AU12	non-targeted	Emotion-Inference	disgust	1
1064920	Emotion-Inference	male	19	disgust	2	f3	0	AU4	targeted	Emotion-Inference	disgust	1
1064920	Emotion-Inference	male	19	disgust	2	f3	0	AU10	targeted	Emotion-Inference	disgust	1
1064920	Emotion-Inference	male	19	fear	2	m9	0	AU2	non-targeted	Emotion-Inference	fear	1
1064920	Emotion-Inference	male	19	fear	2	m9	0	AU10	non-targeted	Emotion-Inference	fear	1
1064920	Emotion-Inference	male	19	fear	2	m9	0	AU12	non-targeted	Emotion-Inference	fear	1
1064920	Emotion-Inference	male	19	fear	2	m9	0	AU4	targeted	Emotion-Inference	fear	1
1064920	Emotion-Inference	male	19	happiness	2	f16	0	AU2	non-targeted	Emotion-Inference	happiness	1
1064920	Emotion-Inference	male	19	happiness	2	f16	0	AU4	non-targeted	Emotion-Inference	happiness	1
1064920	Emotion-Inference	male	19	happiness	2	f16	0	AU10	non-targeted	Emotion-Inference	happiness	1
1064920	Emotion-Inference	male	19	happiness	2	f16	0	AU12	targeted	Emotion-Inference	happiness	1
1064920	Emotion-Inference	male	19	sadness	2	m9	0	AU2	non-targeted	Emotion-Inference	sadness	1
1064920	Emotion-Inference	male	19	sadness	2	m9	0	AU10	non-targeted	Emotion-Inference	sadness	1
1064920	Emotion-Inference	male	19	sadness	2	m9	0	AU12	non-targeted	Emotion-Inference	sadness	1
1064920	Emotion-Inference	male	19	sadness	2	m9	0	AU4	targeted	Emotion-Inference	sadness	1
1064920	Emotion-Inference	male	19	surprise	2	m9	0	AU4	non-targeted	Emotion-Inference	surprise	1
1064920	Emotion-Inference	male	19	surprise	2	m9	0	AU10	non-targeted	Emotion-Inference	surprise	1
1064920	Emotion-Inference	male	19	surprise	2	m9	0	AU12	non-targeted	Emotion-Inference	surprise	1
1064920	Emotion-Inference	male	19	surprise	2	m9	0	AU2	targeted	Emotion-Inference	surprise	1
1064920	Emotion-Inference	male	19	anger	3	f13	0	AU2	non-targeted	Emotion-Inference	anger	1
1064920	Emotion-Inference	male	19	anger	3	f13	0	AU10	non-targeted	Emotion-Inference	anger	1
1064920	Emotion-Inference	male	19	anger	3	f13	0	AU12	non-targeted	Emotion-Inference	anger	1
1064920	Emotion-Inference	male	19	anger	3	f13	0	AU4	targeted	Emotion-Inference	anger	1
1064920	Emotion-Inference	male	19	disgust	3	m1	0	AU2	non-targeted	Emotion-Inference	disgust	1
1064920	Emotion-Inference	male	19	disgust	3	m1	0	AU12	non-targeted	Emotion-Inference	disgust	1
1064920	Emotion-Inference	male	19	disgust	3	m1	0	AU4	targeted	Emotion-Inference	disgust	1
1064920	Emotion-Inference	male	19	disgust	3	m1	0	AU10	targeted	Emotion-Inference	disgust	1
1064920	Emotion-Inference	male	19	fear	3	f13	0	AU2	non-targeted	Emotion-Inference	fear	1
1064920	Emotion-Inference	male	19	fear	3	f13	0	AU10	non-targeted	Emotion-Inference	fear	1
1064920	Emotion-Inference	male	19	fear	3	f13	0	AU12	non-targeted	Emotion-Inference	fear	1
1064920	Emotion-Inference	male	19	fear	3	f13	0	AU4	targeted	Emotion-Inference	fear	1
1064920	Emotion-Inference	male	19	happiness	3	f10	0	AU2	non-targeted	Emotion-Inference	happiness	1
1064920	Emotion-Inference	male	19	happiness	3	f10	0	AU4	non-targeted	Emotion-Inference	happiness	1
1064920	Emotion-Inference	male	19	happiness	3	f10	0	AU10	non-targeted	Emotion-Inference	happiness	1
1064920	Emotion-Inference	male	19	happiness	3	f10	0	AU12	targeted	Emotion-Inference	happiness	1
1064920	Emotion-Inference	male	19	sadness	3	f10	0	AU2	non-targeted	Emotion-Inference	sadness	1
1064920	Emotion-Inference	male	19	sadness	3	f10	0	AU10	non-targeted	Emotion-Inference	sadness	1
1064920	Emotion-Inference	male	19	sadness	3	f10	0	AU12	non-targeted	Emotion-Inference	sadness	1
1064920	Emotion-Inference	male	19	sadness	3	f10	0	AU4	targeted	Emotion-Inference	sadness	1
1064920	Emotion-Inference	male	19	surprise	3	f10	0	AU4	non-targeted	Emotion-Inference	surprise	1
1064920	Emotion-Inference	male	19	surprise	3	f10	0	AU10	non-targeted	Emotion-Inference	surprise	1
1064920	Emotion-Inference	male	19	surprise	3	f10	0	AU12	non-targeted	Emotion-Inference	surprise	1
1064920	Emotion-Inference	male	19	surprise	3	f10	0	AU2	targeted	Emotion-Inference	surprise	1
1064920	Emotion-Inference	male	19	anger	4	m10	0	AU2	non-targeted	Emotion-Inference	anger	1
1064920	Emotion-Inference	male	19	anger	4	m10	0	AU10	non-targeted	Emotion-Inference	anger	1
1064920	Emotion-Inference	male	19	anger	4	m10	0	AU12	non-targeted	Emotion-Inference	anger	1
1064920	Emotion-Inference	male	19	anger	4	m10	0	AU4	targeted	Emotion-Inference	anger	1
1064920	Emotion-Inference	male	19	disgust	4	f13	0	AU2	non-targeted	Emotion-Inference	disgust	1
1064920	Emotion-Inference	male	19	disgust	4	f13	0	AU12	non-targeted	Emotion-Inference	disgust	1
1064920	Emotion-Inference	male	19	disgust	4	f13	0	AU4	targeted	Emotion-Inference	disgust	1
1064920	Emotion-Inference	male	19	disgust	4	f13	0	AU10	targeted	Emotion-Inference	disgust	1
1064920	Emotion-Inference	male	19	fear	4	m10	0	AU2	non-targeted	Emotion-Inference	fear	1
1064920	Emotion-Inference	male	19	fear	4	m10	0	AU10	non-targeted	Emotion-Inference	fear	1
1064920	Emotion-Inference	male	19	fear	4	m10	0	AU12	non-targeted	Emotion-Inference	fear	1
1064920	Emotion-Inference	male	19	fear	4	m10	0	AU4	targeted	Emotion-Inference	fear	1
1064920	Emotion-Inference	male	19	happiness	4	m1	0	AU2	non-targeted	Emotion-Inference	happiness	1
1064920	Emotion-Inference	male	19	happiness	4	m1	0	AU4	non-targeted	Emotion-Inference	happiness	1
1064920	Emotion-Inference	male	19	happiness	4	m1	0	AU10	non-targeted	Emotion-Inference	happiness	1
1064920	Emotion-Inference	male	19	happiness	4	m1	0	AU12	targeted	Emotion-Inference	happiness	1
1064920	Emotion-Inference	male	19	sadness	4	m1	0	AU2	non-targeted	Emotion-Inference	sadness	1
1064920	Emotion-Inference	male	19	sadness	4	m1	0	AU10	non-targeted	Emotion-Inference	sadness	1
1064920	Emotion-Inference	male	19	sadness	4	m1	0	AU12	non-targeted	Emotion-Inference	sadness	1
1064920	Emotion-Inference	male	19	sadness	4	m1	0	AU4	targeted	Emotion-Inference	sadness	1
1064920	Emotion-Inference	male	19	surprise	4	m10	0	AU4	non-targeted	Emotion-Inference	surprise	1
1064920	Emotion-Inference	male	19	surprise	4	m10	0	AU10	non-targeted	Emotion-Inference	surprise	1
1064920	Emotion-Inference	male	19	surprise	4	m10	0	AU12	non-targeted	Emotion-Inference	surprise	1
1064920	Emotion-Inference	male	19	surprise	4	m10	0	AU2	targeted	Emotion-Inference	surprise	1
1065051	Emotion-Inference	male	20	anger	1	m10	0	AU2	non-targeted	Emotion-Inference	anger	1
1065051	Emotion-Inference	male	20	anger	1	m10	0	AU10	non-targeted	Emotion-Inference	anger	1
1065051	Emotion-Inference	male	20	anger	1	m10	0	AU12	non-targeted	Emotion-Inference	anger	1
1065051	Emotion-Inference	male	20	anger	1	m10	0	AU4	targeted	Emotion-Inference	anger	1
1065051	Emotion-Inference	male	20	disgust	1	f13	0	AU2	non-targeted	Emotion-Inference	sadness	0
1065051	Emotion-Inference	male	20	disgust	1	f13	0	AU12	non-targeted	Emotion-Inference	sadness	0
1065051	Emotion-Inference	male	20	disgust	1	f13	0	AU4	targeted	Emotion-Inference	sadness	0
1065051	Emotion-Inference	male	20	disgust	1	f13	0	AU10	targeted	Emotion-Inference	sadness	0
1065051	Emotion-Inference	male	20	fear	1	m10	0	AU2	non-targeted	Emotion-Inference	surprise	0
1065051	Emotion-Inference	male	20	fear	1	m10	0	AU10	non-targeted	Emotion-Inference	surprise	0
1065051	Emotion-Inference	male	20	fear	1	m10	0	AU12	non-targeted	Emotion-Inference	surprise	0
1065051	Emotion-Inference	male	20	fear	1	m10	0	AU4	targeted	Emotion-Inference	surprise	0
1065051	Emotion-Inference	male	20	happiness	1	m1	0	AU2	non-targeted	Emotion-Inference	happiness	1
1065051	Emotion-Inference	male	20	happiness	1	m1	0	AU4	non-targeted	Emotion-Inference	happiness	1
1065051	Emotion-Inference	male	20	happiness	1	m1	0	AU10	non-targeted	Emotion-Inference	happiness	1
1065051	Emotion-Inference	male	20	happiness	1	m1	0	AU12	targeted	Emotion-Inference	happiness	1
1065051	Emotion-Inference	male	20	sadness	1	m1	0	AU2	non-targeted	Emotion-Inference	sadness	1
1065051	Emotion-Inference	male	20	sadness	1	m1	0	AU10	non-targeted	Emotion-Inference	sadness	1
1065051	Emotion-Inference	male	20	sadness	1	m1	0	AU12	non-targeted	Emotion-Inference	sadness	1
1065051	Emotion-Inference	male	20	sadness	1	m1	0	AU4	targeted	Emotion-Inference	sadness	1
1065051	Emotion-Inference	male	20	surprise	1	m10	0	AU4	non-targeted	Emotion-Inference	fear	0
1065051	Emotion-Inference	male	20	surprise	1	m10	0	AU10	non-targeted	Emotion-Inference	fear	0
1065051	Emotion-Inference	male	20	surprise	1	m10	0	AU12	non-targeted	Emotion-Inference	fear	0
1065051	Emotion-Inference	male	20	surprise	1	m10	0	AU2	targeted	Emotion-Inference	fear	0
1065051	Emotion-Inference	male	20	anger	2	f13	0	AU2	non-targeted	Emotion-Inference	anger	1
1065051	Emotion-Inference	male	20	anger	2	f13	0	AU10	non-targeted	Emotion-Inference	anger	1
1065051	Emotion-Inference	male	20	anger	2	f13	0	AU12	non-targeted	Emotion-Inference	anger	1
1065051	Emotion-Inference	male	20	anger	2	f13	0	AU4	targeted	Emotion-Inference	anger	1
1065051	Emotion-Inference	male	20	disgust	2	m1	0	AU2	non-targeted	Emotion-Inference	disgust	1
1065051	Emotion-Inference	male	20	disgust	2	m1	0	AU12	non-targeted	Emotion-Inference	disgust	1
1065051	Emotion-Inference	male	20	disgust	2	m1	0	AU4	targeted	Emotion-Inference	disgust	1
1065051	Emotion-Inference	male	20	disgust	2	m1	0	AU10	targeted	Emotion-Inference	disgust	1
1065051	Emotion-Inference	male	20	fear	2	f13	0	AU2	non-targeted	Emotion-Inference	fear	1
1065051	Emotion-Inference	male	20	fear	2	f13	0	AU10	non-targeted	Emotion-Inference	fear	1
1065051	Emotion-Inference	male	20	fear	2	f13	0	AU12	non-targeted	Emotion-Inference	fear	1
1065051	Emotion-Inference	male	20	fear	2	f13	0	AU4	targeted	Emotion-Inference	fear	1
1065051	Emotion-Inference	male	20	happiness	2	f10	0	AU2	non-targeted	Emotion-Inference	happiness	1
1065051	Emotion-Inference	male	20	happiness	2	f10	0	AU4	non-targeted	Emotion-Inference	happiness	1
1065051	Emotion-Inference	male	20	happiness	2	f10	0	AU10	non-targeted	Emotion-Inference	happiness	1
1065051	Emotion-Inference	male	20	happiness	2	f10	0	AU12	targeted	Emotion-Inference	happiness	1
1065051	Emotion-Inference	male	20	sadness	2	f10	0	AU2	non-targeted	Emotion-Inference	sadness	1
1065051	Emotion-Inference	male	20	sadness	2	f10	0	AU10	non-targeted	Emotion-Inference	sadness	1
1065051	Emotion-Inference	male	20	sadness	2	f10	0	AU12	non-targeted	Emotion-Inference	sadness	1
1065051	Emotion-Inference	male	20	sadness	2	f10	0	AU4	targeted	Emotion-Inference	sadness	1
1065051	Emotion-Inference	male	20	surprise	2	f10	0	AU4	non-targeted	Emotion-Inference	surprise	1
1065051	Emotion-Inference	male	20	surprise	2	f10	0	AU10	non-targeted	Emotion-Inference	surprise	1
1065051	Emotion-Inference	male	20	surprise	2	f10	0	AU12	non-targeted	Emotion-Inference	surprise	1
1065051	Emotion-Inference	male	20	surprise	2	f10	0	AU2	targeted	Emotion-Inference	surprise	1
1065051	Emotion-Inference	male	20	anger	3	m9	0	AU2	non-targeted	Emotion-Inference	anger	1
1065051	Emotion-Inference	male	20	anger	3	m9	0	AU10	non-targeted	Emotion-Inference	anger	1
1065051	Emotion-Inference	male	20	anger	3	m9	0	AU12	non-targeted	Emotion-Inference	anger	1
1065051	Emotion-Inference	male	20	anger	3	m9	0	AU4	targeted	Emotion-Inference	anger	1
1065051	Emotion-Inference	male	20	disgust	3	f3	0	AU2	non-targeted	Emotion-Inference	fear	0
1065051	Emotion-Inference	male	20	disgust	3	f3	0	AU12	non-targeted	Emotion-Inference	fear	0
1065051	Emotion-Inference	male	20	disgust	3	f3	0	AU4	targeted	Emotion-Inference	fear	0
1065051	Emotion-Inference	male	20	disgust	3	f3	0	AU10	targeted	Emotion-Inference	fear	0
1065051	Emotion-Inference	male	20	fear	3	m9	0	AU2	non-targeted	Emotion-Inference	fear	1
1065051	Emotion-Inference	male	20	fear	3	m9	0	AU10	non-targeted	Emotion-Inference	fear	1
1065051	Emotion-Inference	male	20	fear	3	m9	0	AU12	non-targeted	Emotion-Inference	fear	1
1065051	Emotion-Inference	male	20	fear	3	m9	0	AU4	targeted	Emotion-Inference	fear	1
1065051	Emotion-Inference	male	20	happiness	3	f16	0	AU2	non-targeted	Emotion-Inference	happiness	1
1065051	Emotion-Inference	male	20	happiness	3	f16	0	AU4	non-targeted	Emotion-Inference	happiness	1
1065051	Emotion-Inference	male	20	happiness	3	f16	0	AU10	non-targeted	Emotion-Inference	happiness	1
1065051	Emotion-Inference	male	20	happiness	3	f16	0	AU12	targeted	Emotion-Inference	happiness	1
1065051	Emotion-Inference	male	20	sadness	3	m9	0	AU2	non-targeted	Emotion-Inference	sadness	1
1065051	Emotion-Inference	male	20	sadness	3	m9	0	AU10	non-targeted	Emotion-Inference	sadness	1
1065051	Emotion-Inference	male	20	sadness	3	m9	0	AU12	non-targeted	Emotion-Inference	sadness	1
1065051	Emotion-Inference	male	20	sadness	3	m9	0	AU4	targeted	Emotion-Inference	sadness	1
1065051	Emotion-Inference	male	20	surprise	3	m9	0	AU4	non-targeted	Emotion-Inference	surprise	1
1065051	Emotion-Inference	male	20	surprise	3	m9	0	AU10	non-targeted	Emotion-Inference	surprise	1
1065051	Emotion-Inference	male	20	surprise	3	m9	0	AU12	non-targeted	Emotion-Inference	surprise	1
1065051	Emotion-Inference	male	20	surprise	3	m9	0	AU2	targeted	Emotion-Inference	surprise	1
1065051	Emotion-Inference	male	20	anger	4	f3	0	AU2	non-targeted	Emotion-Inference	anger	1
1065051	Emotion-Inference	male	20	anger	4	f3	0	AU10	non-targeted	Emotion-Inference	anger	1
1065051	Emotion-Inference	male	20	anger	4	f3	0	AU12	non-targeted	Emotion-Inference	anger	1
1065051	Emotion-Inference	male	20	anger	4	f3	0	AU4	targeted	Emotion-Inference	anger	1
1065051	Emotion-Inference	male	20	disgust	4	m6	0	AU2	non-targeted	Emotion-Inference	sadness	0
1065051	Emotion-Inference	male	20	disgust	4	m6	0	AU12	non-targeted	Emotion-Inference	sadness	0
1065051	Emotion-Inference	male	20	disgust	4	m6	0	AU4	targeted	Emotion-Inference	sadness	0
1065051	Emotion-Inference	male	20	disgust	4	m6	0	AU10	targeted	Emotion-Inference	sadness	0
1065051	Emotion-Inference	male	20	fear	4	f3	0	AU2	non-targeted	Emotion-Inference	fear	1
1065051	Emotion-Inference	male	20	fear	4	f3	0	AU10	non-targeted	Emotion-Inference	fear	1
1065051	Emotion-Inference	male	20	fear	4	f3	0	AU12	non-targeted	Emotion-Inference	fear	1
1065051	Emotion-Inference	male	20	fear	4	f3	0	AU4	targeted	Emotion-Inference	fear	1
1065051	Emotion-Inference	male	20	happiness	4	m6	0	AU2	non-targeted	Emotion-Inference	happiness	1
1065051	Emotion-Inference	male	20	happiness	4	m6	0	AU4	non-targeted	Emotion-Inference	happiness	1
1065051	Emotion-Inference	male	20	happiness	4	m6	0	AU10	non-targeted	Emotion-Inference	happiness	1
1065051	Emotion-Inference	male	20	happiness	4	m6	0	AU12	targeted	Emotion-Inference	happiness	1
1065051	Emotion-Inference	male	20	sadness	4	f16	0	AU2	non-targeted	Emotion-Inference	disgust	0
1065051	Emotion-Inference	male	20	sadness	4	f16	0	AU10	non-targeted	Emotion-Inference	disgust	0
1065051	Emotion-Inference	male	20	sadness	4	f16	0	AU12	non-targeted	Emotion-Inference	disgust	0
1065051	Emotion-Inference	male	20	sadness	4	f16	0	AU4	targeted	Emotion-Inference	disgust	0
1065051	Emotion-Inference	male	20	surprise	4	f3	0	AU4	non-targeted	Emotion-Inference	surprise	1
1065051	Emotion-Inference	male	20	surprise	4	f3	0	AU10	non-targeted	Emotion-Inference	surprise	1
1065051	Emotion-Inference	male	20	surprise	4	f3	0	AU12	non-targeted	Emotion-Inference	surprise	1
1065051	Emotion-Inference	male	20	surprise	4	f3	0	AU2	targeted	Emotion-Inference	surprise	1
1065059	Emotion-Inference	female	19	anger	1	f3	0	AU2	non-targeted	Emotion-Inference	anger	1
1065059	Emotion-Inference	female	19	anger	1	f3	0	AU10	non-targeted	Emotion-Inference	anger	1
1065059	Emotion-Inference	female	19	anger	1	f3	0	AU12	non-targeted	Emotion-Inference	anger	1
1065059	Emotion-Inference	female	19	anger	1	f3	1	AU4	targeted	Emotion-Inference	anger	1
1065059	Emotion-Inference	female	19	disgust	1	m6	0	AU2	non-targeted	Emotion-Inference	sadness	0
1065059	Emotion-Inference	female	19	disgust	1	m6	0	AU12	non-targeted	Emotion-Inference	sadness	0
1065059	Emotion-Inference	female	19	disgust	1	m6		AU4	targeted	Emotion-Inference	sadness	0
1065059	Emotion-Inference	female	19	disgust	1	m6	0	AU10	targeted	Emotion-Inference	sadness	0
1065059	Emotion-Inference	female	19	fear	1	f3	0	AU2	non-targeted	Emotion-Inference	disgust	0
1065059	Emotion-Inference	female	19	fear	1	f3	0	AU10	non-targeted	Emotion-Inference	disgust	0
1065059	Emotion-Inference	female	19	fear	1	f3	0	AU12	non-targeted	Emotion-Inference	disgust	0
1065059	Emotion-Inference	female	19	fear	1	f3	0	AU4	targeted	Emotion-Inference	disgust	0
1065059	Emotion-Inference	female	19	happiness	1	m6	0	AU2	non-targeted	Emotion-Inference	happiness	1
1065059	Emotion-Inference	female	19	happiness	1	m6	0	AU4	non-targeted	Emotion-Inference	happiness	1
1065059	Emotion-Inference	female	19	happiness	1	m6	0	AU10	non-targeted	Emotion-Inference	happiness	1
1065059	Emotion-Inference	female	19	happiness	1	m6	1	AU12	targeted	Emotion-Inference	happiness	1
1065059	Emotion-Inference	female	19	sadness	1	f16	0	AU2	non-targeted	Emotion-Inference	sadness	1
1065059	Emotion-Inference	female	19	sadness	1	f16	0	AU10	non-targeted	Emotion-Inference	sadness	1
1065059	Emotion-Inference	female	19	sadness	1	f16	0	AU12	non-targeted	Emotion-Inference	sadness	1
1065059	Emotion-Inference	female	19	sadness	1	f16	0	AU4	targeted	Emotion-Inference	sadness	1
1065059	Emotion-Inference	female	19	surprise	1	f3	0	AU4	non-targeted	Emotion-Inference	surprise	1
1065059	Emotion-Inference	female	19	surprise	1	f3	0	AU10	non-targeted	Emotion-Inference	surprise	1
1065059	Emotion-Inference	female	19	surprise	1	f3	0	AU12	non-targeted	Emotion-Inference	surprise	1
1065059	Emotion-Inference	female	19	surprise	1	f3	0	AU2	targeted	Emotion-Inference	surprise	1
1065059	Emotion-Inference	female	19	anger	2	m9	0	AU2	non-targeted	Emotion-Inference	anger	1
1065059	Emotion-Inference	female	19	anger	2	m9	0	AU10	non-targeted	Emotion-Inference	anger	1
1065059	Emotion-Inference	female	19	anger	2	m9	0	AU12	non-targeted	Emotion-Inference	anger	1
1065059	Emotion-Inference	female	19	anger	2	m9	1	AU4	targeted	Emotion-Inference	anger	1
1065059	Emotion-Inference	female	19	disgust	2	f3	0	AU2	non-targeted	Emotion-Inference	disgust	1
1065059	Emotion-Inference	female	19	disgust	2	f3	0	AU12	non-targeted	Emotion-Inference	disgust	1
1065059	Emotion-Inference	female	19	disgust	2	f3	0	AU4	targeted	Emotion-Inference	disgust	1
1065059	Emotion-Inference	female	19	disgust	2	f3	0	AU10	targeted	Emotion-Inference	disgust	1
1065059	Emotion-Inference	female	19	fear	2	m9	0	AU2	non-targeted	Emotion-Inference	fear	1
1065059	Emotion-Inference	female	19	fear	2	m9	0	AU10	non-targeted	Emotion-Inference	fear	1
1065059	Emotion-Inference	female	19	fear	2	m9	0	AU12	non-targeted	Emotion-Inference	fear	1
1065059	Emotion-Inference	female	19	fear	2	m9	0	AU4	targeted	Emotion-Inference	fear	1
1065059	Emotion-Inference	female	19	happiness	2	f16	0	AU2	non-targeted	Emotion-Inference	happiness	1
1065059	Emotion-Inference	female	19	happiness	2	f16	0	AU4	non-targeted	Emotion-Inference	happiness	1
1065059	Emotion-Inference	female	19	happiness	2	f16	0	AU10	non-targeted	Emotion-Inference	happiness	1
1065059	Emotion-Inference	female	19	happiness	2	f16	0	AU12	targeted	Emotion-Inference	happiness	1
1065059	Emotion-Inference	female	19	sadness	2	m9	0	AU2	non-targeted	Emotion-Inference	sadness	1
1065059	Emotion-Inference	female	19	sadness	2	m9	0	AU10	non-targeted	Emotion-Inference	sadness	1
1065059	Emotion-Inference	female	19	sadness	2	m9	0	AU12	non-targeted	Emotion-Inference	sadness	1
1065059	Emotion-Inference	female	19	sadness	2	m9		AU4	targeted	Emotion-Inference	sadness	1
1065059	Emotion-Inference	female	19	surprise	2	m9	0	AU4	non-targeted	Emotion-Inference	surprise	1
1065059	Emotion-Inference	female	19	surprise	2	m9	0	AU10	non-targeted	Emotion-Inference	surprise	1
1065059	Emotion-Inference	female	19	surprise	2	m9	0	AU12	non-targeted	Emotion-Inference	surprise	1
1065059	Emotion-Inference	female	19	surprise	2	m9	0	AU2	targeted	Emotion-Inference	surprise	1
1065059	Emotion-Inference	female	19	anger	3	f13	0	AU2	non-targeted	Emotion-Inference	anger	1
1065059	Emotion-Inference	female	19	anger	3	f13	0	AU10	non-targeted	Emotion-Inference	anger	1
1065059	Emotion-Inference	female	19	anger	3	f13	0	AU12	non-targeted	Emotion-Inference	anger	1
1065059	Emotion-Inference	female	19	anger	3	f13	1	AU4	targeted	Emotion-Inference	anger	1
1065059	Emotion-Inference	female	19	disgust	3	m1	0	AU2	non-targeted	Emotion-Inference	disgust	1
1065059	Emotion-Inference	female	19	disgust	3	m1	0	AU12	non-targeted	Emotion-Inference	disgust	1
1065059	Emotion-Inference	female	19	disgust	3	m1	1	AU4	targeted	Emotion-Inference	disgust	1
1065059	Emotion-Inference	female	19	disgust	3	m1	0	AU10	targeted	Emotion-Inference	disgust	1
1065059	Emotion-Inference	female	19	fear	3	f13	0	AU2	non-targeted	Emotion-Inference	surprise	0
1065059	Emotion-Inference	female	19	fear	3	f13	0	AU10	non-targeted	Emotion-Inference	surprise	0
1065059	Emotion-Inference	female	19	fear	3	f13	0	AU12	non-targeted	Emotion-Inference	surprise	0
1065059	Emotion-Inference	female	19	fear	3	f13	0	AU4	targeted	Emotion-Inference	surprise	0
1065059	Emotion-Inference	female	19	happiness	3	f10	0	AU2	non-targeted	Emotion-Inference	happiness	1
1065059	Emotion-Inference	female	19	happiness	3	f10	0	AU4	non-targeted	Emotion-Inference	happiness	1
1065059	Emotion-Inference	female	19	happiness	3	f10	0	AU10	non-targeted	Emotion-Inference	happiness	1
1065059	Emotion-Inference	female	19	happiness	3	f10	0	AU12	targeted	Emotion-Inference	happiness	1
1065059	Emotion-Inference	female	19	sadness	3	f10	0	AU2	non-targeted	Emotion-Inference	sadness	1
1065059	Emotion-Inference	female	19	sadness	3	f10	0	AU10	non-targeted	Emotion-Inference	sadness	1
1065059	Emotion-Inference	female	19	sadness	3	f10	0	AU12	non-targeted	Emotion-Inference	sadness	1
1065059	Emotion-Inference	female	19	sadness	3	f10	1	AU4	targeted	Emotion-Inference	sadness	1
1065059	Emotion-Inference	female	19	surprise	3	f10	0	AU4	non-targeted	Emotion-Inference	surprise	1
1065059	Emotion-Inference	female	19	surprise	3	f10	0	AU10	non-targeted	Emotion-Inference	surprise	1
1065059	Emotion-Inference	female	19	surprise	3	f10	0	AU12	non-targeted	Emotion-Inference	surprise	1
1065059	Emotion-Inference	female	19	surprise	3	f10	0	AU2	targeted	Emotion-Inference	surprise	1
1065059	Emotion-Inference	female	19	anger	4	m10	0	AU2	non-targeted	Emotion-Inference	anger	1
1065059	Emotion-Inference	female	19	anger	4	m10	0	AU10	non-targeted	Emotion-Inference	anger	1
1065059	Emotion-Inference	female	19	anger	4	m10	0	AU12	non-targeted	Emotion-Inference	anger	1
1065059	Emotion-Inference	female	19	anger	4	m10	1	AU4	targeted	Emotion-Inference	anger	1
1065059	Emotion-Inference	female	19	disgust	4	f13	0	AU2	non-targeted	Emotion-Inference	disgust	1
1065059	Emotion-Inference	female	19	disgust	4	f13	0	AU12	non-targeted	Emotion-Inference	disgust	1
1065059	Emotion-Inference	female	19	disgust	4	f13	1	AU4	targeted	Emotion-Inference	disgust	1
1065059	Emotion-Inference	female	19	disgust	4	f13	0	AU10	targeted	Emotion-Inference	disgust	1
1065059	Emotion-Inference	female	19	fear	4	m10	0	AU2	non-targeted	Emotion-Inference	disgust	0
1065059	Emotion-Inference	female	19	fear	4	m10	0	AU10	non-targeted	Emotion-Inference	disgust	0
1065059	Emotion-Inference	female	19	fear	4	m10	0	AU12	non-targeted	Emotion-Inference	disgust	0
1065059	Emotion-Inference	female	19	fear	4	m10	0	AU4	targeted	Emotion-Inference	disgust	0
1065059	Emotion-Inference	female	19	happiness	4	m1	0	AU2	non-targeted	Emotion-Inference	happiness	1
1065059	Emotion-Inference	female	19	happiness	4	m1	0	AU4	non-targeted	Emotion-Inference	happiness	1
1065059	Emotion-Inference	female	19	happiness	4	m1	0	AU10	non-targeted	Emotion-Inference	happiness	1
1065059	Emotion-Inference	female	19	happiness	4	m1	0	AU12	targeted	Emotion-Inference	happiness	1
1065059	Emotion-Inference	female	19	sadness	4	m1	0	AU2	non-targeted	Emotion-Inference	sadness	1
1065059	Emotion-Inference	female	19	sadness	4	m1	0	AU10	non-targeted	Emotion-Inference	sadness	1
1065059	Emotion-Inference	female	19	sadness	4	m1	0	AU12	non-targeted	Emotion-Inference	sadness	1
1065059	Emotion-Inference	female	19	sadness	4	m1	0	AU4	targeted	Emotion-Inference	sadness	1
1065059	Emotion-Inference	female	19	surprise	4	m10	0	AU4	non-targeted	Emotion-Inference	surprise	1
1065059	Emotion-Inference	female	19	surprise	4	m10	0	AU10	non-targeted	Emotion-Inference	surprise	1
1065059	Emotion-Inference	female	19	surprise	4	m10	0	AU12	non-targeted	Emotion-Inference	surprise	1
1065059	Emotion-Inference	female	19	surprise	4	m10	0	AU2	targeted	Emotion-Inference	surprise	1
1065112	Emotion-Inference	male	18	anger	1	m10	0	AU2	non-targeted	Emotion-Inference	anger	1
1065112	Emotion-Inference	male	18	anger	1	m10	0	AU10	non-targeted	Emotion-Inference	anger	1
1065112	Emotion-Inference	male	18	anger	1	m10	0	AU12	non-targeted	Emotion-Inference	anger	1
1065112	Emotion-Inference	male	18	anger	1	m10	0	AU4	targeted	Emotion-Inference	anger	1
1065112	Emotion-Inference	male	18	disgust	1	f13	0	AU2	non-targeted	Emotion-Inference	disgust	1
1065112	Emotion-Inference	male	18	disgust	1	f13	0	AU12	non-targeted	Emotion-Inference	disgust	1
1065112	Emotion-Inference	male	18	disgust	1	f13	0	AU4	targeted	Emotion-Inference	disgust	1
1065112	Emotion-Inference	male	18	disgust	1	f13	0	AU10	targeted	Emotion-Inference	disgust	1
1065112	Emotion-Inference	male	18	fear	1	m10		AU2	non-targeted	Emotion-Inference	anger	0
1065112	Emotion-Inference	male	18	fear	1	m10		AU10	non-targeted	Emotion-Inference	anger	0
1065112	Emotion-Inference	male	18	fear	1	m10		AU12	non-targeted	Emotion-Inference	anger	0
1065112	Emotion-Inference	male	18	fear	1	m10		AU4	targeted	Emotion-Inference	anger	0
1065112	Emotion-Inference	male	18	happiness	1	m1	0	AU2	non-targeted	Emotion-Inference	happiness	1
1065112	Emotion-Inference	male	18	happiness	1	m1	0	AU4	non-targeted	Emotion-Inference	happiness	1
1065112	Emotion-Inference	male	18	happiness	1	m1	0	AU10	non-targeted	Emotion-Inference	happiness	1
1065112	Emotion-Inference	male	18	happiness	1	m1	1	AU12	targeted	Emotion-Inference	happiness	1
1065112	Emotion-Inference	male	18	sadness	1	m1	0	AU2	non-targeted	Emotion-Inference	sadness	1
1065112	Emotion-Inference	male	18	sadness	1	m1	0	AU10	non-targeted	Emotion-Inference	sadness	1
1065112	Emotion-Inference	male	18	sadness	1	m1	0	AU12	non-targeted	Emotion-Inference	sadness	1
1065112	Emotion-Inference	male	18	sadness	1	m1	0	AU4	targeted	Emotion-Inference	sadness	1
1065112	Emotion-Inference	male	18	surprise	1	m10	0	AU4	non-targeted	Emotion-Inference	surprise	1
1065112	Emotion-Inference	male	18	surprise	1	m10	0	AU10	non-targeted	Emotion-Inference	surprise	1
1065112	Emotion-Inference	male	18	surprise	1	m10	0	AU12	non-targeted	Emotion-Inference	surprise	1
1065112	Emotion-Inference	male	18	surprise	1	m10	0	AU2	targeted	Emotion-Inference	surprise	1
1065112	Emotion-Inference	male	18	anger	2	f13	0	AU2	non-targeted	Emotion-Inference	anger	1
1065112	Emotion-Inference	male	18	anger	2	f13	0	AU10	non-targeted	Emotion-Inference	anger	1
1065112	Emotion-Inference	male	18	anger	2	f13	0	AU12	non-targeted	Emotion-Inference	anger	1
1065112	Emotion-Inference	male	18	anger	2	f13	0	AU4	targeted	Emotion-Inference	anger	1
1065112	Emotion-Inference	male	18	disgust	2	m1	0	AU2	non-targeted	Emotion-Inference	disgust	1
1065112	Emotion-Inference	male	18	disgust	2	m1	0	AU12	non-targeted	Emotion-Inference	disgust	1
1065112	Emotion-Inference	male	18	disgust	2	m1	0	AU4	targeted	Emotion-Inference	disgust	1
1065112	Emotion-Inference	male	18	disgust	2	m1	0	AU10	targeted	Emotion-Inference	disgust	1
1065112	Emotion-Inference	male	18	fear	2	f13	0	AU2	non-targeted	Emotion-Inference	disgust	0
1065112	Emotion-Inference	male	18	fear	2	f13	0	AU10	non-targeted	Emotion-Inference	disgust	0
1065112	Emotion-Inference	male	18	fear	2	f13	0	AU12	non-targeted	Emotion-Inference	disgust	0
1065112	Emotion-Inference	male	18	fear	2	f13	0	AU4	targeted	Emotion-Inference	disgust	0
1065112	Emotion-Inference	male	18	happiness	2	f10	0	AU2	non-targeted	Emotion-Inference	happiness	1
1065112	Emotion-Inference	male	18	happiness	2	f10	0	AU4	non-targeted	Emotion-Inference	happiness	1
1065112	Emotion-Inference	male	18	happiness	2	f10	0	AU10	non-targeted	Emotion-Inference	happiness	1
1065112	Emotion-Inference	male	18	happiness	2	f10	1	AU12	targeted	Emotion-Inference	happiness	1
1065112	Emotion-Inference	male	18	sadness	2	f10	0	AU2	non-targeted	Emotion-Inference	disgust	0
1065112	Emotion-Inference	male	18	sadness	2	f10	0	AU10	non-targeted	Emotion-Inference	disgust	0
1065112	Emotion-Inference	male	18	sadness	2	f10	0	AU12	non-targeted	Emotion-Inference	disgust	0
1065112	Emotion-Inference	male	18	sadness	2	f10	0	AU4	targeted	Emotion-Inference	disgust	0
1065112	Emotion-Inference	male	18	surprise	2	f10	0	AU4	non-targeted	Emotion-Inference	surprise	1
1065112	Emotion-Inference	male	18	surprise	2	f10	0	AU10	non-targeted	Emotion-Inference	surprise	1
1065112	Emotion-Inference	male	18	surprise	2	f10	0	AU12	non-targeted	Emotion-Inference	surprise	1
1065112	Emotion-Inference	male	18	surprise	2	f10	0	AU2	targeted	Emotion-Inference	surprise	1
1065112	Emotion-Inference	male	18	anger	3	m9	0	AU2	non-targeted	Emotion-Inference	anger	1
1065112	Emotion-Inference	male	18	anger	3	m9		AU10	non-targeted	Emotion-Inference	anger	1
1065112	Emotion-Inference	male	18	anger	3	m9		AU12	non-targeted	Emotion-Inference	anger	1
1065112	Emotion-Inference	male	18	anger	3	m9	0	AU4	targeted	Emotion-Inference	anger	1
1065112	Emotion-Inference	male	18	disgust	3	f3	0	AU2	non-targeted	Emotion-Inference	disgust	1
1065112	Emotion-Inference	male	18	disgust	3	f3	1	AU12	non-targeted	Emotion-Inference	disgust	1
1065112	Emotion-Inference	male	18	disgust	3	f3	0	AU4	targeted	Emotion-Inference	disgust	1
1065112	Emotion-Inference	male	18	disgust	3	f3	0	AU10	targeted	Emotion-Inference	disgust	1
1065112	Emotion-Inference	male	18	fear	3	m9	0	AU2	non-targeted	Emotion-Inference	fear	1
1065112	Emotion-Inference	male	18	fear	3	m9	0	AU10	non-targeted	Emotion-Inference	fear	1
1065112	Emotion-Inference	male	18	fear	3	m9	0	AU12	non-targeted	Emotion-Inference	fear	1
1065112	Emotion-Inference	male	18	fear	3	m9	0	AU4	targeted	Emotion-Inference	fear	1
1065112	Emotion-Inference	male	18	happiness	3	f16	0	AU2	non-targeted	Emotion-Inference	happiness	1
1065112	Emotion-Inference	male	18	happiness	3	f16	0	AU4	non-targeted	Emotion-Inference	happiness	1
1065112	Emotion-Inference	male	18	happiness	3	f16	0	AU10	non-targeted	Emotion-Inference	happiness	1
1065112	Emotion-Inference	male	18	happiness	3	f16	1	AU12	targeted	Emotion-Inference	happiness	1
1065112	Emotion-Inference	male	18	sadness	3	m9	0	AU2	non-targeted	Emotion-Inference	disgust	0
1065112	Emotion-Inference	male	18	sadness	3	m9	0	AU10	non-targeted	Emotion-Inference	disgust	0
1065112	Emotion-Inference	male	18	sadness	3	m9	0	AU12	non-targeted	Emotion-Inference	disgust	0
1065112	Emotion-Inference	male	18	sadness	3	m9	0	AU4	targeted	Emotion-Inference	disgust	0
1065112	Emotion-Inference	male	18	surprise	3	m9		AU4	non-targeted	Emotion-Inference	surprise	1
1065112	Emotion-Inference	male	18	surprise	3	m9		AU10	non-targeted	Emotion-Inference	surprise	1
1065112	Emotion-Inference	male	18	surprise	3	m9		AU12	non-targeted	Emotion-Inference	surprise	1
1065112	Emotion-Inference	male	18	surprise	3	m9		AU2	targeted	Emotion-Inference	surprise	1
1065112	Emotion-Inference	male	18	anger	4	f3	0	AU2	non-targeted	Emotion-Inference	anger	1
1065112	Emotion-Inference	male	18	anger	4	f3	0	AU10	non-targeted	Emotion-Inference	anger	1
1065112	Emotion-Inference	male	18	anger	4	f3	0	AU12	non-targeted	Emotion-Inference	anger	1
1065112	Emotion-Inference	male	18	anger	4	f3	0	AU4	targeted	Emotion-Inference	anger	1
1065112	Emotion-Inference	male	18	disgust	4	m6	0	AU2	non-targeted	Emotion-Inference	disgust	1
1065112	Emotion-Inference	male	18	disgust	4	m6	1	AU12	non-targeted	Emotion-Inference	disgust	1
1065112	Emotion-Inference	male	18	disgust	4	m6	0	AU4	targeted	Emotion-Inference	disgust	1
1065112	Emotion-Inference	male	18	disgust	4	m6	0	AU10	targeted	Emotion-Inference	disgust	1
1065112	Emotion-Inference	male	18	fear	4	f3	0	AU2	non-targeted	Emotion-Inference	fear	1
1065112	Emotion-Inference	male	18	fear	4	f3	0	AU10	non-targeted	Emotion-Inference	fear	1
1065112	Emotion-Inference	male	18	fear	4	f3	0	AU12	non-targeted	Emotion-Inference	fear	1
1065112	Emotion-Inference	male	18	fear	4	f3	0	AU4	targeted	Emotion-Inference	fear	1
1065112	Emotion-Inference	male	18	happiness	4	m6	0	AU2	non-targeted	Emotion-Inference	happiness	1
1065112	Emotion-Inference	male	18	happiness	4	m6	0	AU4	non-targeted	Emotion-Inference	happiness	1
1065112	Emotion-Inference	male	18	happiness	4	m6	0	AU10	non-targeted	Emotion-Inference	happiness	1
1065112	Emotion-Inference	male	18	happiness	4	m6	1	AU12	targeted	Emotion-Inference	happiness	1
1065112	Emotion-Inference	male	18	sadness	4	f16	0	AU2	non-targeted	Emotion-Inference	disgust	0
1065112	Emotion-Inference	male	18	sadness	4	f16	0	AU10	non-targeted	Emotion-Inference	disgust	0
1065112	Emotion-Inference	male	18	sadness	4	f16		AU12	non-targeted	Emotion-Inference	disgust	0
1065112	Emotion-Inference	male	18	sadness	4	f16	0	AU4	targeted	Emotion-Inference	disgust	0
1065112	Emotion-Inference	male	18	surprise	4	f3	0	AU4	non-targeted	Emotion-Inference	surprise	1
1065112	Emotion-Inference	male	18	surprise	4	f3	0	AU10	non-targeted	Emotion-Inference	surprise	1
1065112	Emotion-Inference	male	18	surprise	4	f3	1	AU12	non-targeted	Emotion-Inference	surprise	1
1065112	Emotion-Inference	male	18	surprise	4	f3	0	AU2	targeted	Emotion-Inference	surprise	1
1065190	Emotion-Inference	female	19	anger	1	f3	0	AU2	non-targeted	Emotion-Inference	anger	1
1065190	Emotion-Inference	female	19	anger	1	f3	0	AU10	non-targeted	Emotion-Inference	anger	1
1065190	Emotion-Inference	female	19	anger	1	f3	0	AU12	non-targeted	Emotion-Inference	anger	1
1065190	Emotion-Inference	female	19	anger	1	f3	0	AU4	targeted	Emotion-Inference	anger	1
1065190	Emotion-Inference	female	19	disgust	1	m6	0	AU2	non-targeted	Emotion-Inference	disgust	1
1065190	Emotion-Inference	female	19	disgust	1	m6	0	AU12	non-targeted	Emotion-Inference	disgust	1
1065190	Emotion-Inference	female	19	disgust	1	m6	0	AU4	targeted	Emotion-Inference	disgust	1
1065190	Emotion-Inference	female	19	disgust	1	m6	0	AU10	targeted	Emotion-Inference	disgust	1
1065190	Emotion-Inference	female	19	fear	1	f3	0	AU2	non-targeted	Emotion-Inference	fear	1
1065190	Emotion-Inference	female	19	fear	1	f3	0	AU10	non-targeted	Emotion-Inference	fear	1
1065190	Emotion-Inference	female	19	fear	1	f3	0	AU12	non-targeted	Emotion-Inference	fear	1
1065190	Emotion-Inference	female	19	fear	1	f3	0	AU4	targeted	Emotion-Inference	fear	1
1065190	Emotion-Inference	female	19	happiness	1	m6	0	AU2	non-targeted	Emotion-Inference	happiness	1
1065190	Emotion-Inference	female	19	happiness	1	m6	0	AU4	non-targeted	Emotion-Inference	happiness	1
1065190	Emotion-Inference	female	19	happiness	1	m6	0	AU10	non-targeted	Emotion-Inference	happiness	1
1065190	Emotion-Inference	female	19	happiness	1	m6	0	AU12	targeted	Emotion-Inference	happiness	1
1065190	Emotion-Inference	female	19	sadness	1	f16	0	AU2	non-targeted	Emotion-Inference	disgust	0
1065190	Emotion-Inference	female	19	sadness	1	f16	0	AU10	non-targeted	Emotion-Inference	disgust	0
1065190	Emotion-Inference	female	19	sadness	1	f16	0	AU12	non-targeted	Emotion-Inference	disgust	0
1065190	Emotion-Inference	female	19	sadness	1	f16	0	AU4	targeted	Emotion-Inference	disgust	0
1065190	Emotion-Inference	female	19	surprise	1	f3	0	AU4	non-targeted	Emotion-Inference	surprise	1
1065190	Emotion-Inference	female	19	surprise	1	f3	0	AU10	non-targeted	Emotion-Inference	surprise	1
1065190	Emotion-Inference	female	19	surprise	1	f3	0	AU12	non-targeted	Emotion-Inference	surprise	1
1065190	Emotion-Inference	female	19	surprise	1	f3	1	AU2	targeted	Emotion-Inference	surprise	1
1065190	Emotion-Inference	female	19	anger	2	m9	0	AU2	non-targeted	Emotion-Inference	anger	1
1065190	Emotion-Inference	female	19	anger	2	m9	0	AU10	non-targeted	Emotion-Inference	anger	1
1065190	Emotion-Inference	female	19	anger	2	m9	0	AU12	non-targeted	Emotion-Inference	anger	1
1065190	Emotion-Inference	female	19	anger	2	m9	0	AU4	targeted	Emotion-Inference	anger	1
1065190	Emotion-Inference	female	19	disgust	2	f3	0	AU2	non-targeted	Emotion-Inference	disgust	1
1065190	Emotion-Inference	female	19	disgust	2	f3	0	AU12	non-targeted	Emotion-Inference	disgust	1
1065190	Emotion-Inference	female	19	disgust	2	f3	0	AU4	targeted	Emotion-Inference	disgust	1
1065190	Emotion-Inference	female	19	disgust	2	f3	0	AU10	targeted	Emotion-Inference	disgust	1
1065190	Emotion-Inference	female	19	fear	2	m9	0	AU2	non-targeted	Emotion-Inference	fear	1
1065190	Emotion-Inference	female	19	fear	2	m9	0	AU10	non-targeted	Emotion-Inference	fear	1
1065190	Emotion-Inference	female	19	fear	2	m9	0	AU12	non-targeted	Emotion-Inference	fear	1
1065190	Emotion-Inference	female	19	fear	2	m9	0	AU4	targeted	Emotion-Inference	fear	1
1065190	Emotion-Inference	female	19	happiness	2	f16		AU2	non-targeted	Emotion-Inference	happiness	1
1065190	Emotion-Inference	female	19	happiness	2	f16		AU4	non-targeted	Emotion-Inference	happiness	1
1065190	Emotion-Inference	female	19	happiness	2	f16		AU10	non-targeted	Emotion-Inference	happiness	1
1065190	Emotion-Inference	female	19	happiness	2	f16		AU12	targeted	Emotion-Inference	happiness	1
1065190	Emotion-Inference	female	19	sadness	2	m9	0	AU2	non-targeted	Emotion-Inference	sadness	1
1065190	Emotion-Inference	female	19	sadness	2	m9	0	AU10	non-targeted	Emotion-Inference	sadness	1
1065190	Emotion-Inference	female	19	sadness	2	m9	0	AU12	non-targeted	Emotion-Inference	sadness	1
1065190	Emotion-Inference	female	19	sadness	2	m9	0	AU4	targeted	Emotion-Inference	sadness	1
1065190	Emotion-Inference	female	19	surprise	2	m9	0	AU4	non-targeted	Emotion-Inference	surprise	1
1065190	Emotion-Inference	female	19	surprise	2	m9	0	AU10	non-targeted	Emotion-Inference	surprise	1
1065190	Emotion-Inference	female	19	surprise	2	m9	0	AU12	non-targeted	Emotion-Inference	surprise	1
1065190	Emotion-Inference	female	19	surprise	2	m9	0	AU2	targeted	Emotion-Inference	surprise	1
1065190	Emotion-Inference	female	19	anger	3	f13	0	AU2	non-targeted	Emotion-Inference	anger	1
1065190	Emotion-Inference	female	19	anger	3	f13	0	AU10	non-targeted	Emotion-Inference	anger	1
1065190	Emotion-Inference	female	19	anger	3	f13	0	AU12	non-targeted	Emotion-Inference	anger	1
1065190	Emotion-Inference	female	19	anger	3	f13	0	AU4	targeted	Emotion-Inference	anger	1
1065190	Emotion-Inference	female	19	disgust	3	m1	0	AU2	non-targeted	Emotion-Inference	disgust	1
1065190	Emotion-Inference	female	19	disgust	3	m1	0	AU12	non-targeted	Emotion-Inference	disgust	1
1065190	Emotion-Inference	female	19	disgust	3	m1	0	AU4	targeted	Emotion-Inference	disgust	1
1065190	Emotion-Inference	female	19	disgust	3	m1	0	AU10	targeted	Emotion-Inference	disgust	1
1065190	Emotion-Inference	female	19	fear	3	f13	0	AU2	non-targeted	Emotion-Inference	fear	1
1065190	Emotion-Inference	female	19	fear	3	f13	0	AU10	non-targeted	Emotion-Inference	fear	1
1065190	Emotion-Inference	female	19	fear	3	f13	0	AU12	non-targeted	Emotion-Inference	fear	1
1065190	Emotion-Inference	female	19	fear	3	f13	0	AU4	targeted	Emotion-Inference	fear	1
1065190	Emotion-Inference	female	19	happiness	3	f10	0	AU2	non-targeted	Emotion-Inference	happiness	1
1065190	Emotion-Inference	female	19	happiness	3	f10	0	AU4	non-targeted	Emotion-Inference	happiness	1
1065190	Emotion-Inference	female	19	happiness	3	f10	0	AU10	non-targeted	Emotion-Inference	happiness	1
1065190	Emotion-Inference	female	19	happiness	3	f10	0	AU12	targeted	Emotion-Inference	happiness	1
1065190	Emotion-Inference	female	19	sadness	3	f10	1	AU2	non-targeted	Emotion-Inference	sadness	1
1065190	Emotion-Inference	female	19	sadness	3	f10	0	AU10	non-targeted	Emotion-Inference	sadness	1
1065190	Emotion-Inference	female	19	sadness	3	f10	0	AU12	non-targeted	Emotion-Inference	sadness	1
1065190	Emotion-Inference	female	19	sadness	3	f10	0	AU4	targeted	Emotion-Inference	sadness	1
1065190	Emotion-Inference	female	19	surprise	3	f10	0	AU4	non-targeted	Emotion-Inference	surprise	1
1065190	Emotion-Inference	female	19	surprise	3	f10	0	AU10	non-targeted	Emotion-Inference	surprise	1
1065190	Emotion-Inference	female	19	surprise	3	f10	0	AU12	non-targeted	Emotion-Inference	surprise	1
1065190	Emotion-Inference	female	19	surprise	3	f10	0	AU2	targeted	Emotion-Inference	surprise	1
1065190	Emotion-Inference	female	19	anger	4	m10	0	AU2	non-targeted	Emotion-Inference	anger	1
1065190	Emotion-Inference	female	19	anger	4	m10	0	AU10	non-targeted	Emotion-Inference	anger	1
1065190	Emotion-Inference	female	19	anger	4	m10	0	AU12	non-targeted	Emotion-Inference	anger	1
1065190	Emotion-Inference	female	19	anger	4	m10	0	AU4	targeted	Emotion-Inference	anger	1
1065190	Emotion-Inference	female	19	disgust	4	f13	1	AU2	non-targeted	Emotion-Inference	sadness	0
1065190	Emotion-Inference	female	19	disgust	4	f13	0	AU12	non-targeted	Emotion-Inference	sadness	0
1065190	Emotion-Inference	female	19	disgust	4	f13	0	AU4	targeted	Emotion-Inference	sadness	0
1065190	Emotion-Inference	female	19	disgust	4	f13	0	AU10	targeted	Emotion-Inference	sadness	0
1065190	Emotion-Inference	female	19	fear	4	m10	0	AU2	non-targeted	Emotion-Inference	fear	1
1065190	Emotion-Inference	female	19	fear	4	m10	0	AU10	non-targeted	Emotion-Inference	fear	1
1065190	Emotion-Inference	female	19	fear	4	m10	0	AU12	non-targeted	Emotion-Inference	fear	1
1065190	Emotion-Inference	female	19	fear	4	m10	0	AU4	targeted	Emotion-Inference	fear	1
1065190	Emotion-Inference	female	19	happiness	4	m1	0	AU2	non-targeted	Emotion-Inference	happiness	1
1065190	Emotion-Inference	female	19	happiness	4	m1	0	AU4	non-targeted	Emotion-Inference	happiness	1
1065190	Emotion-Inference	female	19	happiness	4	m1	0	AU10	non-targeted	Emotion-Inference	happiness	1
1065190	Emotion-Inference	female	19	happiness	4	m1	0	AU12	targeted	Emotion-Inference	happiness	1
1065190	Emotion-Inference	female	19	sadness	4	m1	0	AU2	non-targeted	Emotion-Inference	sadness	1
1065190	Emotion-Inference	female	19	sadness	4	m1	0	AU10	non-targeted	Emotion-Inference	sadness	1
1065190	Emotion-Inference	female	19	sadness	4	m1	0	AU12	non-targeted	Emotion-Inference	sadness	1
1065190	Emotion-Inference	female	19	sadness	4	m1	0	AU4	targeted	Emotion-Inference	sadness	1
1065190	Emotion-Inference	female	19	surprise	4	m10	0	AU4	non-targeted	Emotion-Inference	surprise	1
1065190	Emotion-Inference	female	19	surprise	4	m10	0	AU10	non-targeted	Emotion-Inference	surprise	1
1065190	Emotion-Inference	female	19	surprise	4	m10	0	AU12	non-targeted	Emotion-Inference	surprise	1
1065190	Emotion-Inference	female	19	surprise	4	m10	0	AU2	targeted	Emotion-Inference	surprise	1
1065214	Emotion-Inference	male	19	anger	1	f3	0	AU2	non-targeted	Emotion-Inference	disgust	0
1065214	Emotion-Inference	male	19	anger	1	f3	0	AU10	non-targeted	Emotion-Inference	disgust	0
1065214	Emotion-Inference	male	19	anger	1	f3	0	AU12	non-targeted	Emotion-Inference	disgust	0
1065214	Emotion-Inference	male	19	anger	1	f3	0	AU4	targeted	Emotion-Inference	disgust	0
1065214	Emotion-Inference	male	19	disgust	1	m6	0	AU2	non-targeted	Emotion-Inference	sadness	0
1065214	Emotion-Inference	male	19	disgust	1	m6	0	AU12	non-targeted	Emotion-Inference	sadness	0
1065214	Emotion-Inference	male	19	disgust	1	m6	0	AU4	targeted	Emotion-Inference	sadness	0
1065214	Emotion-Inference	male	19	disgust	1	m6	0	AU10	targeted	Emotion-Inference	sadness	0
1065214	Emotion-Inference	male	19	fear	1	f3	0	AU2	non-targeted	Emotion-Inference	fear	1
1065214	Emotion-Inference	male	19	fear	1	f3		AU10	non-targeted	Emotion-Inference	fear	1
1065214	Emotion-Inference	male	19	fear	1	f3		AU12	non-targeted	Emotion-Inference	fear	1
1065214	Emotion-Inference	male	19	fear	1	f3	0	AU4	targeted	Emotion-Inference	fear	1
1065214	Emotion-Inference	male	19	happiness	1	m6	0	AU2	non-targeted	Emotion-Inference	happiness	1
1065214	Emotion-Inference	male	19	happiness	1	m6	0	AU4	non-targeted	Emotion-Inference	happiness	1
1065214	Emotion-Inference	male	19	happiness	1	m6	0	AU10	non-targeted	Emotion-Inference	happiness	1
1065214	Emotion-Inference	male	19	happiness	1	m6	0	AU12	targeted	Emotion-Inference	happiness	1
1065214	Emotion-Inference	male	19	sadness	1	f16	0	AU2	non-targeted	Emotion-Inference	fear	0
1065214	Emotion-Inference	male	19	sadness	1	f16		AU10	non-targeted	Emotion-Inference	fear	0
1065214	Emotion-Inference	male	19	sadness	1	f16		AU12	non-targeted	Emotion-Inference	fear	0
1065214	Emotion-Inference	male	19	sadness	1	f16	0	AU4	targeted	Emotion-Inference	fear	0
1065214	Emotion-Inference	male	19	surprise	1	f3	0	AU4	non-targeted	Emotion-Inference	surprise	1
1065214	Emotion-Inference	male	19	surprise	1	f3		AU10	non-targeted	Emotion-Inference	surprise	1
1065214	Emotion-Inference	male	19	surprise	1	f3		AU12	non-targeted	Emotion-Inference	surprise	1
1065214	Emotion-Inference	male	19	surprise	1	f3	0	AU2	targeted	Emotion-Inference	surprise	1
1065214	Emotion-Inference	male	19	anger	2	m9	0	AU2	non-targeted	Emotion-Inference	anger	1
1065214	Emotion-Inference	male	19	anger	2	m9		AU10	non-targeted	Emotion-Inference	anger	1
1065214	Emotion-Inference	male	19	anger	2	m9		AU12	non-targeted	Emotion-Inference	anger	1
1065214	Emotion-Inference	male	19	anger	2	m9	0	AU4	targeted	Emotion-Inference	anger	1
1065214	Emotion-Inference	male	19	disgust	2	f3	0	AU2	non-targeted	Emotion-Inference	disgust	1
1065214	Emotion-Inference	male	19	disgust	2	f3		AU12	non-targeted	Emotion-Inference	disgust	1
1065214	Emotion-Inference	male	19	disgust	2	f3	0	AU4	targeted	Emotion-Inference	disgust	1
1065214	Emotion-Inference	male	19	disgust	2	f3		AU10	targeted	Emotion-Inference	disgust	1
1065214	Emotion-Inference	male	19	fear	2	m9	0	AU2	non-targeted	Emotion-Inference	fear	1
1065214	Emotion-Inference	male	19	fear	2	m9		AU10	non-targeted	Emotion-Inference	fear	1
1065214	Emotion-Inference	male	19	fear	2	m9		AU12	non-targeted	Emotion-Inference	fear	1
1065214	Emotion-Inference	male	19	fear	2	m9	1	AU4	targeted	Emotion-Inference	fear	1
1065214	Emotion-Inference	male	19	happiness	2	f16	0	AU2	non-targeted	Emotion-Inference	happiness	1
1065214	Emotion-Inference	male	19	happiness	2	f16	0	AU4	non-targeted	Emotion-Inference	happiness	1
1065214	Emotion-Inference	male	19	happiness	2	f16		AU10	non-targeted	Emotion-Inference	happiness	1
1065214	Emotion-Inference	male	19	happiness	2	f16		AU12	targeted	Emotion-Inference	happiness	1
1065214	Emotion-Inference	male	19	sadness	2	m9	0	AU2	non-targeted	Emotion-Inference	sadness	1
1065214	Emotion-Inference	male	19	sadness	2	m9		AU10	non-targeted	Emotion-Inference	sadness	1
1065214	Emotion-Inference	male	19	sadness	2	m9		AU12	non-targeted	Emotion-Inference	sadness	1
1065214	Emotion-Inference	male	19	sadness	2	m9	0	AU4	targeted	Emotion-Inference	sadness	1
1065214	Emotion-Inference	male	19	surprise	2	m9	0	AU4	non-targeted	Emotion-Inference	surprise	1
1065214	Emotion-Inference	male	19	surprise	2	m9		AU10	non-targeted	Emotion-Inference	surprise	1
1065214	Emotion-Inference	male	19	surprise	2	m9		AU12	non-targeted	Emotion-Inference	surprise	1
1065214	Emotion-Inference	male	19	surprise	2	m9	0	AU2	targeted	Emotion-Inference	surprise	1
1065214	Emotion-Inference	male	19	anger	3	f13		AU2	non-targeted	Emotion-Inference	anger	1
1065214	Emotion-Inference	male	19	anger	3	f13		AU10	non-targeted	Emotion-Inference	anger	1
1065214	Emotion-Inference	male	19	anger	3	f13		AU12	non-targeted	Emotion-Inference	anger	1
1065214	Emotion-Inference	male	19	anger	3	f13		AU4	targeted	Emotion-Inference	anger	1
1065214	Emotion-Inference	male	19	disgust	3	m1	0	AU2	non-targeted	Emotion-Inference	disgust	1
1065214	Emotion-Inference	male	19	disgust	3	m1	0	AU12	non-targeted	Emotion-Inference	disgust	1
1065214	Emotion-Inference	male	19	disgust	3	m1	0	AU4	targeted	Emotion-Inference	disgust	1
1065214	Emotion-Inference	male	19	disgust	3	m1	0	AU10	targeted	Emotion-Inference	disgust	1
1065214	Emotion-Inference	male	19	fear	3	f13		AU2	non-targeted	Emotion-Inference	fear	1
1065214	Emotion-Inference	male	19	fear	3	f13		AU10	non-targeted	Emotion-Inference	fear	1
1065214	Emotion-Inference	male	19	fear	3	f13		AU12	non-targeted	Emotion-Inference	fear	1
1065214	Emotion-Inference	male	19	fear	3	f13		AU4	targeted	Emotion-Inference	fear	1
1065214	Emotion-Inference	male	19	happiness	3	f10	0	AU2	non-targeted	Emotion-Inference	happiness	1
1065214	Emotion-Inference	male	19	happiness	3	f10	0	AU4	non-targeted	Emotion-Inference	happiness	1
1065214	Emotion-Inference	male	19	happiness	3	f10		AU10	non-targeted	Emotion-Inference	happiness	1
1065214	Emotion-Inference	male	19	happiness	3	f10		AU12	targeted	Emotion-Inference	happiness	1
1065214	Emotion-Inference	male	19	sadness	3	f10	0	AU2	non-targeted	Emotion-Inference	sadness	1
1065214	Emotion-Inference	male	19	sadness	3	f10		AU10	non-targeted	Emotion-Inference	sadness	1
1065214	Emotion-Inference	male	19	sadness	3	f10		AU12	non-targeted	Emotion-Inference	sadness	1
1065214	Emotion-Inference	male	19	sadness	3	f10	0	AU4	targeted	Emotion-Inference	sadness	1
1065214	Emotion-Inference	male	19	surprise	3	f10	0	AU4	non-targeted	Emotion-Inference	surprise	1
1065214	Emotion-Inference	male	19	surprise	3	f10		AU10	non-targeted	Emotion-Inference	surprise	1
1065214	Emotion-Inference	male	19	surprise	3	f10	1	AU12	non-targeted	Emotion-Inference	surprise	1
1065214	Emotion-Inference	male	19	surprise	3	f10	0	AU2	targeted	Emotion-Inference	surprise	1
1065214	Emotion-Inference	male	19	anger	4	m10		AU2	non-targeted	Emotion-Inference	anger	1
1065214	Emotion-Inference	male	19	anger	4	m10		AU10	non-targeted	Emotion-Inference	anger	1
1065214	Emotion-Inference	male	19	anger	4	m10	1	AU12	non-targeted	Emotion-Inference	anger	1
1065214	Emotion-Inference	male	19	anger	4	m10		AU4	targeted	Emotion-Inference	anger	1
1065214	Emotion-Inference	male	19	disgust	4	f13		AU2	non-targeted	Emotion-Inference	disgust	1
1065214	Emotion-Inference	male	19	disgust	4	f13		AU12	non-targeted	Emotion-Inference	disgust	1
1065214	Emotion-Inference	male	19	disgust	4	f13		AU4	targeted	Emotion-Inference	disgust	1
1065214	Emotion-Inference	male	19	disgust	4	f13		AU10	targeted	Emotion-Inference	disgust	1
1065214	Emotion-Inference	male	19	fear	4	m10	0	AU2	non-targeted	Emotion-Inference	disgust	0
1065214	Emotion-Inference	male	19	fear	4	m10	0	AU10	non-targeted	Emotion-Inference	disgust	0
1065214	Emotion-Inference	male	19	fear	4	m10	0	AU12	non-targeted	Emotion-Inference	disgust	0
1065214	Emotion-Inference	male	19	fear	4	m10	0	AU4	targeted	Emotion-Inference	disgust	0
1065214	Emotion-Inference	male	19	happiness	4	m1		AU2	non-targeted	Emotion-Inference	happiness	1
1065214	Emotion-Inference	male	19	happiness	4	m1		AU4	non-targeted	Emotion-Inference	happiness	1
1065214	Emotion-Inference	male	19	happiness	4	m1		AU10	non-targeted	Emotion-Inference	happiness	1
1065214	Emotion-Inference	male	19	happiness	4	m1		AU12	targeted	Emotion-Inference	happiness	1
1065214	Emotion-Inference	male	19	sadness	4	m1	0	AU2	non-targeted	Emotion-Inference	sadness	1
1065214	Emotion-Inference	male	19	sadness	4	m1	0	AU10	non-targeted	Emotion-Inference	sadness	1
1065214	Emotion-Inference	male	19	sadness	4	m1	1	AU12	non-targeted	Emotion-Inference	sadness	1
1065214	Emotion-Inference	male	19	sadness	4	m1	0	AU4	targeted	Emotion-Inference	sadness	1
1065214	Emotion-Inference	male	19	surprise	4	m10	0	AU4	non-targeted	Emotion-Inference	surprise	1
1065214	Emotion-Inference	male	19	surprise	4	m10	0	AU10	non-targeted	Emotion-Inference	surprise	1
1065214	Emotion-Inference	male	19	surprise	4	m10	0	AU12	non-targeted	Emotion-Inference	surprise	1
1065214	Emotion-Inference	male	19	surprise	4	m10	0	AU2	targeted	Emotion-Inference	surprise	1
1065240	Emotion-Inference	male	19	anger	1	m10	0	AU2	non-targeted	Emotion-Inference	disgust	0
1065240	Emotion-Inference	male	19	anger	1	m10	0	AU10	non-targeted	Emotion-Inference	disgust	0
1065240	Emotion-Inference	male	19	anger	1	m10	0	AU12	non-targeted	Emotion-Inference	disgust	0
1065240	Emotion-Inference	male	19	anger	1	m10	0	AU4	targeted	Emotion-Inference	disgust	0
1065240	Emotion-Inference	male	19	disgust	1	f13	0	AU2	non-targeted	Emotion-Inference	disgust	1
1065240	Emotion-Inference	male	19	disgust	1	f13	0	AU12	non-targeted	Emotion-Inference	disgust	1
1065240	Emotion-Inference	male	19	disgust	1	f13	0	AU4	targeted	Emotion-Inference	disgust	1
1065240	Emotion-Inference	male	19	disgust	1	f13	0	AU10	targeted	Emotion-Inference	disgust	1
1065240	Emotion-Inference	male	19	fear	1	m10	0	AU2	non-targeted	Emotion-Inference	surprise	0
1065240	Emotion-Inference	male	19	fear	1	m10	0	AU10	non-targeted	Emotion-Inference	surprise	0
1065240	Emotion-Inference	male	19	fear	1	m10	0	AU12	non-targeted	Emotion-Inference	surprise	0
1065240	Emotion-Inference	male	19	fear	1	m10	0	AU4	targeted	Emotion-Inference	surprise	0
1065240	Emotion-Inference	male	19	happiness	1	m1	0	AU2	non-targeted	Emotion-Inference	happiness	1
1065240	Emotion-Inference	male	19	happiness	1	m1	0	AU4	non-targeted	Emotion-Inference	happiness	1
1065240	Emotion-Inference	male	19	happiness	1	m1	0	AU10	non-targeted	Emotion-Inference	happiness	1
1065240	Emotion-Inference	male	19	happiness	1	m1	0	AU12	targeted	Emotion-Inference	happiness	1
1065240	Emotion-Inference	male	19	sadness	1	m1	0	AU2	non-targeted	Emotion-Inference	sadness	1
1065240	Emotion-Inference	male	19	sadness	1	m1	0	AU10	non-targeted	Emotion-Inference	sadness	1
1065240	Emotion-Inference	male	19	sadness	1	m1	0	AU12	non-targeted	Emotion-Inference	sadness	1
1065240	Emotion-Inference	male	19	sadness	1	m1	0	AU4	targeted	Emotion-Inference	sadness	1
1065240	Emotion-Inference	male	19	surprise	1	m10	0	AU4	non-targeted	Emotion-Inference	surprise	1
1065240	Emotion-Inference	male	19	surprise	1	m10	0	AU10	non-targeted	Emotion-Inference	surprise	1
1065240	Emotion-Inference	male	19	surprise	1	m10	0	AU12	non-targeted	Emotion-Inference	surprise	1
1065240	Emotion-Inference	male	19	surprise	1	m10	0	AU2	targeted	Emotion-Inference	surprise	1
1065240	Emotion-Inference	male	19	anger	2	f13	0	AU2	non-targeted	Emotion-Inference	anger	1
1065240	Emotion-Inference	male	19	anger	2	f13	0	AU10	non-targeted	Emotion-Inference	anger	1
1065240	Emotion-Inference	male	19	anger	2	f13	0	AU12	non-targeted	Emotion-Inference	anger	1
1065240	Emotion-Inference	male	19	anger	2	f13	0	AU4	targeted	Emotion-Inference	anger	1
1065240	Emotion-Inference	male	19	disgust	2	m1	0	AU2	non-targeted	Emotion-Inference	disgust	1
1065240	Emotion-Inference	male	19	disgust	2	m1	0	AU12	non-targeted	Emotion-Inference	disgust	1
1065240	Emotion-Inference	male	19	disgust	2	m1	0	AU4	targeted	Emotion-Inference	disgust	1
1065240	Emotion-Inference	male	19	disgust	2	m1	0	AU10	targeted	Emotion-Inference	disgust	1
1065240	Emotion-Inference	male	19	fear	2	f13	0	AU2	non-targeted	Emotion-Inference	fear	1
1065240	Emotion-Inference	male	19	fear	2	f13	0	AU10	non-targeted	Emotion-Inference	fear	1
1065240	Emotion-Inference	male	19	fear	2	f13	0	AU12	non-targeted	Emotion-Inference	fear	1
1065240	Emotion-Inference	male	19	fear	2	f13	0	AU4	targeted	Emotion-Inference	fear	1
1065240	Emotion-Inference	male	19	happiness	2	f10	0	AU2	non-targeted	Emotion-Inference	happiness	1
1065240	Emotion-Inference	male	19	happiness	2	f10	0	AU4	non-targeted	Emotion-Inference	happiness	1
1065240	Emotion-Inference	male	19	happiness	2	f10	0	AU10	non-targeted	Emotion-Inference	happiness	1
1065240	Emotion-Inference	male	19	happiness	2	f10	0	AU12	targeted	Emotion-Inference	happiness	1
1065240	Emotion-Inference	male	19	sadness	2	f10	0	AU2	non-targeted	Emotion-Inference	sadness	1
1065240	Emotion-Inference	male	19	sadness	2	f10	0	AU10	non-targeted	Emotion-Inference	sadness	1
1065240	Emotion-Inference	male	19	sadness	2	f10	0	AU12	non-targeted	Emotion-Inference	sadness	1
1065240	Emotion-Inference	male	19	sadness	2	f10	0	AU4	targeted	Emotion-Inference	sadness	1
1065240	Emotion-Inference	male	19	surprise	2	f10	0	AU4	non-targeted	Emotion-Inference	surprise	1
1065240	Emotion-Inference	male	19	surprise	2	f10	0	AU10	non-targeted	Emotion-Inference	surprise	1
1065240	Emotion-Inference	male	19	surprise	2	f10	0	AU12	non-targeted	Emotion-Inference	surprise	1
1065240	Emotion-Inference	male	19	surprise	2	f10	0	AU2	targeted	Emotion-Inference	surprise	1
1065240	Emotion-Inference	male	19	anger	3	m9	0	AU2	non-targeted	Emotion-Inference	anger	1
1065240	Emotion-Inference	male	19	anger	3	m9	0	AU10	non-targeted	Emotion-Inference	anger	1
1065240	Emotion-Inference	male	19	anger	3	m9	0	AU12	non-targeted	Emotion-Inference	anger	1
1065240	Emotion-Inference	male	19	anger	3	m9	0	AU4	targeted	Emotion-Inference	anger	1
1065240	Emotion-Inference	male	19	disgust	3	f3	0	AU2	non-targeted	Emotion-Inference	disgust	1
1065240	Emotion-Inference	male	19	disgust	3	f3	0	AU12	non-targeted	Emotion-Inference	disgust	1
1065240	Emotion-Inference	male	19	disgust	3	f3	0	AU4	targeted	Emotion-Inference	disgust	1
1065240	Emotion-Inference	male	19	disgust	3	f3	0	AU10	targeted	Emotion-Inference	disgust	1
1065240	Emotion-Inference	male	19	fear	3	m9	0	AU2	non-targeted	Emotion-Inference	disgust	0
1065240	Emotion-Inference	male	19	fear	3	m9	0	AU10	non-targeted	Emotion-Inference	disgust	0
1065240	Emotion-Inference	male	19	fear	3	m9	0	AU12	non-targeted	Emotion-Inference	disgust	0
1065240	Emotion-Inference	male	19	fear	3	m9	0	AU4	targeted	Emotion-Inference	disgust	0
1065240	Emotion-Inference	male	19	happiness	3	f16	0	AU2	non-targeted	Emotion-Inference	happiness	1
1065240	Emotion-Inference	male	19	happiness	3	f16	0	AU4	non-targeted	Emotion-Inference	happiness	1
1065240	Emotion-Inference	male	19	happiness	3	f16	0	AU10	non-targeted	Emotion-Inference	happiness	1
1065240	Emotion-Inference	male	19	happiness	3	f16	0	AU12	targeted	Emotion-Inference	happiness	1
1065240	Emotion-Inference	male	19	sadness	3	m9	0	AU2	non-targeted	Emotion-Inference	sadness	1
1065240	Emotion-Inference	male	19	sadness	3	m9	0	AU10	non-targeted	Emotion-Inference	sadness	1
1065240	Emotion-Inference	male	19	sadness	3	m9	0	AU12	non-targeted	Emotion-Inference	sadness	1
1065240	Emotion-Inference	male	19	sadness	3	m9	0	AU4	targeted	Emotion-Inference	sadness	1
1065240	Emotion-Inference	male	19	surprise	3	m9	0	AU4	non-targeted	Emotion-Inference	surprise	1
1065240	Emotion-Inference	male	19	surprise	3	m9	0	AU10	non-targeted	Emotion-Inference	surprise	1
1065240	Emotion-Inference	male	19	surprise	3	m9	1	AU12	non-targeted	Emotion-Inference	surprise	1
1065240	Emotion-Inference	male	19	surprise	3	m9	0	AU2	targeted	Emotion-Inference	surprise	1
1065240	Emotion-Inference	male	19	anger	4	f3	0	AU2	non-targeted	Emotion-Inference	anger	1
1065240	Emotion-Inference	male	19	anger	4	f3	0	AU10	non-targeted	Emotion-Inference	anger	1
1065240	Emotion-Inference	male	19	anger	4	f3	0	AU12	non-targeted	Emotion-Inference	anger	1
1065240	Emotion-Inference	male	19	anger	4	f3	0	AU4	targeted	Emotion-Inference	anger	1
1065240	Emotion-Inference	male	19	disgust	4	m6	0	AU2	non-targeted	Emotion-Inference	disgust	1
1065240	Emotion-Inference	male	19	disgust	4	m6	0	AU12	non-targeted	Emotion-Inference	disgust	1
1065240	Emotion-Inference	male	19	disgust	4	m6	0	AU4	targeted	Emotion-Inference	disgust	1
1065240	Emotion-Inference	male	19	disgust	4	m6	0	AU10	targeted	Emotion-Inference	disgust	1
1065240	Emotion-Inference	male	19	fear	4	f3	0	AU2	non-targeted	Emotion-Inference	fear	1
1065240	Emotion-Inference	male	19	fear	4	f3		AU10	non-targeted	Emotion-Inference	fear	1
1065240	Emotion-Inference	male	19	fear	4	f3		AU12	non-targeted	Emotion-Inference	fear	1
1065240	Emotion-Inference	male	19	fear	4	f3	0	AU4	targeted	Emotion-Inference	fear	1
1065240	Emotion-Inference	male	19	happiness	4	m6	0	AU2	non-targeted	Emotion-Inference	happiness	1
1065240	Emotion-Inference	male	19	happiness	4	m6	0	AU4	non-targeted	Emotion-Inference	happiness	1
1065240	Emotion-Inference	male	19	happiness	4	m6	0	AU10	non-targeted	Emotion-Inference	happiness	1
1065240	Emotion-Inference	male	19	happiness	4	m6	0	AU12	targeted	Emotion-Inference	happiness	1
1065240	Emotion-Inference	male	19	sadness	4	f16	0	AU2	non-targeted	Emotion-Inference	sadness	1
1065240	Emotion-Inference	male	19	sadness	4	f16		AU10	non-targeted	Emotion-Inference	sadness	1
1065240	Emotion-Inference	male	19	sadness	4	f16		AU12	non-targeted	Emotion-Inference	sadness	1
1065240	Emotion-Inference	male	19	sadness	4	f16	0	AU4	targeted	Emotion-Inference	sadness	1
1065240	Emotion-Inference	male	19	surprise	4	f3	0	AU4	non-targeted	Emotion-Inference	surprise	1
1065240	Emotion-Inference	male	19	surprise	4	f3	0	AU10	non-targeted	Emotion-Inference	surprise	1
1065240	Emotion-Inference	male	19	surprise	4	f3	0	AU12	non-targeted	Emotion-Inference	surprise	1
1065240	Emotion-Inference	male	19	surprise	4	f3	0	AU2	targeted	Emotion-Inference	surprise	1
1065291	Emotion-Inference	female	19	anger	1	m10	0	AU2	non-targeted	Emotion-Inference	anger	1
1065291	Emotion-Inference	female	19	anger	1	m10	0	AU10	non-targeted	Emotion-Inference	anger	1
1065291	Emotion-Inference	female	19	anger	1	m10	0	AU12	non-targeted	Emotion-Inference	anger	1
1065291	Emotion-Inference	female	19	anger	1	m10	1	AU4	targeted	Emotion-Inference	anger	1
1065291	Emotion-Inference	female	19	disgust	1	f13	0	AU2	non-targeted	Emotion-Inference	sadness	0
1065291	Emotion-Inference	female	19	disgust	1	f13	0	AU12	non-targeted	Emotion-Inference	sadness	0
1065291	Emotion-Inference	female	19	disgust	1	f13	0	AU4	targeted	Emotion-Inference	sadness	0
1065291	Emotion-Inference	female	19	disgust	1	f13	0	AU10	targeted	Emotion-Inference	sadness	0
1065291	Emotion-Inference	female	19	fear	1	m10	0	AU2	non-targeted	Emotion-Inference	fear	1
1065291	Emotion-Inference	female	19	fear	1	m10	0	AU10	non-targeted	Emotion-Inference	fear	1
1065291	Emotion-Inference	female	19	fear	1	m10	0	AU12	non-targeted	Emotion-Inference	fear	1
1065291	Emotion-Inference	female	19	fear	1	m10	0	AU4	targeted	Emotion-Inference	fear	1
1065291	Emotion-Inference	female	19	happiness	1	m1	0	AU2	non-targeted	Emotion-Inference	happiness	1
1065291	Emotion-Inference	female	19	happiness	1	m1	0	AU4	non-targeted	Emotion-Inference	happiness	1
1065291	Emotion-Inference	female	19	happiness	1	m1	0	AU10	non-targeted	Emotion-Inference	happiness	1
1065291	Emotion-Inference	female	19	happiness	1	m1	0	AU12	targeted	Emotion-Inference	happiness	1
1065291	Emotion-Inference	female	19	sadness	1	m1	0	AU2	non-targeted	Emotion-Inference	sadness	1
1065291	Emotion-Inference	female	19	sadness	1	m1	0	AU10	non-targeted	Emotion-Inference	sadness	1
1065291	Emotion-Inference	female	19	sadness	1	m1	0	AU12	non-targeted	Emotion-Inference	sadness	1
1065291	Emotion-Inference	female	19	sadness	1	m1	0	AU4	targeted	Emotion-Inference	sadness	1
1065291	Emotion-Inference	female	19	surprise	1	m10	0	AU4	non-targeted	Emotion-Inference	surprise	1
1065291	Emotion-Inference	female	19	surprise	1	m10	0	AU10	non-targeted	Emotion-Inference	surprise	1
1065291	Emotion-Inference	female	19	surprise	1	m10	0	AU12	non-targeted	Emotion-Inference	surprise	1
1065291	Emotion-Inference	female	19	surprise	1	m10	1	AU2	targeted	Emotion-Inference	surprise	1
1065291	Emotion-Inference	female	19	anger	2	f13	0	AU2	non-targeted	Emotion-Inference	anger	1
1065291	Emotion-Inference	female	19	anger	2	f13	0	AU10	non-targeted	Emotion-Inference	anger	1
1065291	Emotion-Inference	female	19	anger	2	f13	0	AU12	non-targeted	Emotion-Inference	anger	1
1065291	Emotion-Inference	female	19	anger	2	f13	1	AU4	targeted	Emotion-Inference	anger	1
1065291	Emotion-Inference	female	19	disgust	2	m1	0	AU2	non-targeted	Emotion-Inference	disgust	1
1065291	Emotion-Inference	female	19	disgust	2	m1	0	AU12	non-targeted	Emotion-Inference	disgust	1
1065291	Emotion-Inference	female	19	disgust	2	m1	1	AU4	targeted	Emotion-Inference	disgust	1
1065291	Emotion-Inference	female	19	disgust	2	m1	0	AU10	targeted	Emotion-Inference	disgust	1
1065291	Emotion-Inference	female	19	fear	2	f13	1	AU2	non-targeted	Emotion-Inference	fear	1
1065291	Emotion-Inference	female	19	fear	2	f13	0	AU10	non-targeted	Emotion-Inference	fear	1
1065291	Emotion-Inference	female	19	fear	2	f13	0	AU12	non-targeted	Emotion-Inference	fear	1
1065291	Emotion-Inference	female	19	fear	2	f13	0	AU4	targeted	Emotion-Inference	fear	1
1065291	Emotion-Inference	female	19	happiness	2	f10	0	AU2	non-targeted	Emotion-Inference	happiness	1
1065291	Emotion-Inference	female	19	happiness	2	f10	0	AU4	non-targeted	Emotion-Inference	happiness	1
1065291	Emotion-Inference	female	19	happiness	2	f10	0	AU10	non-targeted	Emotion-Inference	happiness	1
1065291	Emotion-Inference	female	19	happiness	2	f10	0	AU12	targeted	Emotion-Inference	happiness	1
1065291	Emotion-Inference	female	19	sadness	2	f10	0	AU2	non-targeted	Emotion-Inference	sadness	1
1065291	Emotion-Inference	female	19	sadness	2	f10	0	AU10	non-targeted	Emotion-Inference	sadness	1
1065291	Emotion-Inference	female	19	sadness	2	f10	0	AU12	non-targeted	Emotion-Inference	sadness	1
1065291	Emotion-Inference	female	19	sadness	2	f10	0	AU4	targeted	Emotion-Inference	sadness	1
1065291	Emotion-Inference	female	19	surprise	2	f10	0	AU4	non-targeted	Emotion-Inference	surprise	1
1065291	Emotion-Inference	female	19	surprise	2	f10	0	AU10	non-targeted	Emotion-Inference	surprise	1
1065291	Emotion-Inference	female	19	surprise	2	f10	0	AU12	non-targeted	Emotion-Inference	surprise	1
1065291	Emotion-Inference	female	19	surprise	2	f10	0	AU2	targeted	Emotion-Inference	surprise	1
1065291	Emotion-Inference	female	19	anger	3	m9		AU2	non-targeted	Emotion-Inference	anger	1
1065291	Emotion-Inference	female	19	anger	3	m9	0	AU10	non-targeted	Emotion-Inference	anger	1
1065291	Emotion-Inference	female	19	anger	3	m9	0	AU12	non-targeted	Emotion-Inference	anger	1
1065291	Emotion-Inference	female	19	anger	3	m9		AU4	targeted	Emotion-Inference	anger	1
1065291	Emotion-Inference	female	19	disgust	3	f3		AU2	non-targeted	Emotion-Inference	disgust	1
1065291	Emotion-Inference	female	19	disgust	3	f3	0	AU12	non-targeted	Emotion-Inference	disgust	1
1065291	Emotion-Inference	female	19	disgust	3	f3		AU4	targeted	Emotion-Inference	disgust	1
1065291	Emotion-Inference	female	19	disgust	3	f3	0	AU10	targeted	Emotion-Inference	disgust	1
1065291	Emotion-Inference	female	19	fear	3	m9		AU2	non-targeted	Emotion-Inference	fear	1
1065291	Emotion-Inference	female	19	fear	3	m9	0	AU10	non-targeted	Emotion-Inference	fear	1
1065291	Emotion-Inference	female	19	fear	3	m9	0	AU12	non-targeted	Emotion-Inference	fear	1
1065291	Emotion-Inference	female	19	fear	3	m9		AU4	targeted	Emotion-Inference	fear	1
1065291	Emotion-Inference	female	19	happiness	3	f16		AU2	non-targeted	Emotion-Inference	happiness	1
1065291	Emotion-Inference	female	19	happiness	3	f16		AU4	non-targeted	Emotion-Inference	happiness	1
1065291	Emotion-Inference	female	19	happiness	3	f16	0	AU10	non-targeted	Emotion-Inference	happiness	1
1065291	Emotion-Inference	female	19	happiness	3	f16	0	AU12	targeted	Emotion-Inference	happiness	1
1065291	Emotion-Inference	female	19	sadness	3	m9		AU2	non-targeted	Emotion-Inference	sadness	1
1065291	Emotion-Inference	female	19	sadness	3	m9		AU10	non-targeted	Emotion-Inference	sadness	1
1065291	Emotion-Inference	female	19	sadness	3	m9		AU12	non-targeted	Emotion-Inference	sadness	1
1065291	Emotion-Inference	female	19	sadness	3	m9	1	AU4	targeted	Emotion-Inference	sadness	1
1065291	Emotion-Inference	female	19	surprise	3	m9		AU4	non-targeted	Emotion-Inference	surprise	1
1065291	Emotion-Inference	female	19	surprise	3	m9	0	AU10	non-targeted	Emotion-Inference	surprise	1
1065291	Emotion-Inference	female	19	surprise	3	m9	0	AU12	non-targeted	Emotion-Inference	surprise	1
1065291	Emotion-Inference	female	19	surprise	3	m9		AU2	targeted	Emotion-Inference	surprise	1
1065291	Emotion-Inference	female	19	anger	4	f3		AU2	non-targeted	Emotion-Inference	anger	1
1065291	Emotion-Inference	female	19	anger	4	f3	0	AU10	non-targeted	Emotion-Inference	anger	1
1065291	Emotion-Inference	female	19	anger	4	f3	0	AU12	non-targeted	Emotion-Inference	anger	1
1065291	Emotion-Inference	female	19	anger	4	f3	1	AU4	targeted	Emotion-Inference	anger	1
1065291	Emotion-Inference	female	19	disgust	4	m6		AU2	non-targeted	Emotion-Inference	disgust	1
1065291	Emotion-Inference	female	19	disgust	4	m6	0	AU12	non-targeted	Emotion-Inference	disgust	1
1065291	Emotion-Inference	female	19	disgust	4	m6	1	AU4	targeted	Emotion-Inference	disgust	1
[truncated: 3,281 more rows]
